# Supplementary material for: Fluorescence chemosensing of meldonium using a cross-reactive sensor array
Source: Royal Society of Chemistry journal article supplement (doi:10.1039/d0an00209g), 2020-01-01
Supplement: d0an00209g2.pdf [file d0an00209g2.pdf]

## ELECTRONIC SUPPLEMENTARY INFORMATION 2

### Fluorescence chemosensing of meldonium using a cross-reactive sensor array

Ergin Yalcin<sup>[b]</sup>, Cem Erkmen<sup>[a]</sup>, Tugba Taskin-Tok<sup>[c-d]</sup>, Mehmet G. Caglayan<sup>[a]\*</sup>

[a] Ankara University, Faculty of Pharmacy, Department of Analytical Chemistry, Ankara, Turkey

[b] Iskenderun Technical University, Faculty of Engineering and Natural Sciences, Engineering Basic Sciences, Hatay, Turkey

[c] Gaziantep University, Faculty of Arts and Sciences, Department of Chemistry, Gaziantep, Turkey

[d] Gaziantep University, Institute of Health Sciences, Department of Bioinformatics and Computational Biology, Gaziantep, Turkey

E-mail: gcaglayan@ankara.edu.tr

#### Table of Contents

Computational data

2

## Computational data

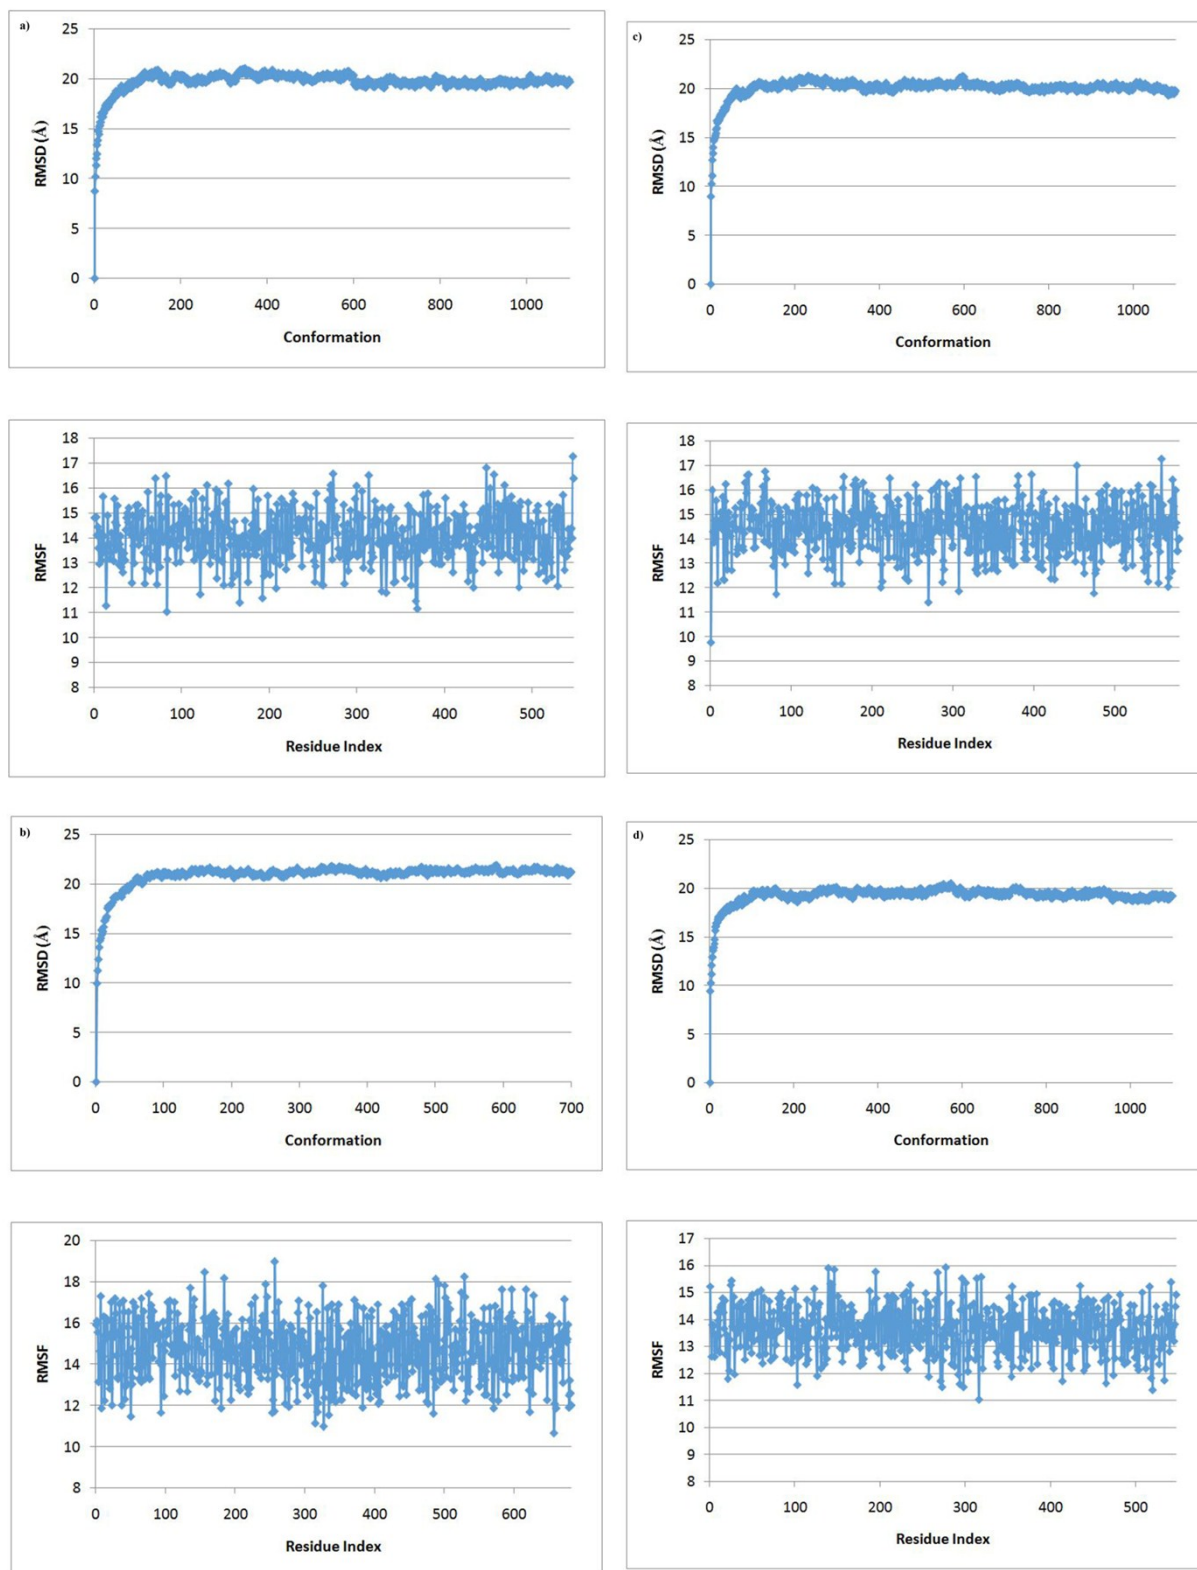

**Figure S2-1.** RMSD trajectory and RMSF profile of meldonium chemosensor (S1-S4) complexes, a, b, c, d during the MD simulation, respectively.

Geometry optimization of meldonium.

Final Coordinates (Angstroms)

---

| ATOM | X         | Y         | Z         |
|------|-----------|-----------|-----------|
| 1 O  | -1.031663 | -4.026475 | 0.130191  |
| 2 C  | -1.164447 | -2.759728 | 0.284958  |
| 3 O  | -2.134648 | -2.019100 | 0.675139  |
| 4 C  | 0.242621  | -1.987176 | -0.033044 |
| 5 C  | -0.063775 | -0.506348 | -0.412119 |
| 6 N  | 1.210654  | 0.213052  | -0.234064 |
| 7 N  | 0.856925  | 2.171933  | 0.023120  |
| 8 C  | 2.254912  | 2.702147  | 0.057521  |
| 9 C  | 0.103609  | 2.556734  | -1.212484 |
| 10 C | 0.078736  | 2.382523  | 1.285828  |
| 11 H | 0.817217  | -2.051751 | 0.903945  |
| 12 H | 0.788420  | -2.516512 | -0.815869 |
| 13 H | -0.379674 | -0.433204 | -1.457701 |
| 14 H | -0.893917 | -0.198616 | 0.247256  |
| 15 H | 1.483639  | 0.119450  | 0.771810  |
| 16 H | 2.250593  | 3.803985  | 0.102928  |
| 17 H | 2.763675  | 2.305251  | 0.941441  |
| 18 H | 2.773013  | 2.351877  | -0.836207 |
| 19 H | -0.064059 | 3.645343  | -1.230984 |
| 20 H | 0.686196  | 2.248308  | -2.084194 |
| 21 H | -0.863012 | 2.043092  | -1.217329 |
| 22 H | -0.141901 | 3.451448  | 1.433941  |
| 23 H | -0.860716 | 1.824055  | 1.228076  |
| 24 H | 0.666602  | 2.019012  | 2.135342  |

---

Geometry optimization of S1 molecules.

Final Coordinates (Angstroms)

-----

| ATOM | X         | Y         | Z         |
|------|-----------|-----------|-----------|
| 1 C  | 2.725501  | -0.946100 | 2.816753  |
| 2 C  | 2.385158  | 0.028903  | 1.873372  |
| 3 C  | 1.026287  | 0.346179  | 1.590483  |
| 4 C  | -0.019209 | -0.340646 | 2.300829  |
| 5 C  | 0.360048  | -1.349406 | 3.223906  |
| 6 C  | 1.695192  | -1.663572 | 3.487651  |
| 7 C  | 0.707061  | 1.315762  | 0.584557  |
| 8 N  | -0.598549 | 1.686949  | 0.363812  |
| 9 C  | -1.674336 | 1.058363  | 1.059664  |
| 10 C | -1.396388 | 0.031143  | 2.019515  |
| 11 C | -3.004925 | 1.452768  | 0.787454  |
| 12 C | -4.072042 | 0.833325  | 1.451851  |
| 13 C | -3.815110 | -0.201387 | 2.389286  |
| 14 C | -2.507235 | -0.585552 | 2.660096  |
| 15 N | -5.436011 | 1.187939  | 1.218243  |
| 16 N | 4.115972  | -1.152337 | 3.067941  |
| 17 C | 1.808147  | 1.925214  | -0.244505 |
| 18 C | 2.483094  | 3.091169  | 0.182801  |
| 19 C | 3.533575  | 3.623675  | -0.586360 |
| 20 C | 3.913765  | 2.996035  | -1.785546 |
| 21 C | 3.246927  | 1.832818  | -2.209523 |
| 22 C | 2.198421  | 1.289330  | -1.447776 |
| 23 C | -0.923590 | 2.607989  | -0.800115 |
| 24 C | -1.287588 | 4.044533  | -0.356960 |

|    |   |            |           |           |
|----|---|------------|-----------|-----------|
| 25 | C | 4.751201   | -2.031702 | 3.953544  |
| 26 | C | 6.278809   | -1.880884 | 4.009631  |
| 27 | O | 4.134213   | -2.874251 | 4.668535  |
| 28 | C | 6.802853   | -1.787398 | 5.477910  |
| 29 | N | 8.282947   | -1.618428 | 5.508707  |
| 30 | C | -5.955545  | 2.264540  | 0.488307  |
| 31 | C | -7.488688  | 2.355048  | 0.494498  |
| 32 | C | -8.021474  | 3.120219  | -0.747367 |
| 33 | N | -9.507603  | 3.068987  | -0.837631 |
| 34 | O | -5.225975  | 3.106388  | -0.112720 |
| 35 | C | 9.033685   | -2.570953 | 6.376641  |
| 36 | C | 10.543176  | -2.452516 | 6.082429  |
| 37 | O | 11.007250  | -1.049402 | 6.289621  |
| 38 | C | 10.260920  | -0.113627 | 5.405909  |
| 39 | C | 8.744860   | -0.210496 | 5.677398  |
| 40 | C | -10.020822 | 3.374381  | -2.209503 |
| 41 | C | -11.534071 | 3.095631  | -2.275770 |
| 42 | O | -12.257669 | 3.905815  | -1.255237 |
| 43 | C | -11.744671 | 3.598677  | 0.106906  |
| 44 | C | -10.228545 | 3.870019  | 0.198051  |
| 45 | H | 3.164243   | 0.556916  | 1.330650  |
| 46 | H | -0.404163  | -1.910409 | 3.753233  |
| 47 | H | 1.962729   | -2.441298 | 4.192768  |
| 48 | H | -3.231676  | 2.217966  | 0.063852  |
| 49 | H | -4.644783  | -0.694361 | 2.895336  |
| 50 | H | -2.336798  | -1.378853 | 3.381547  |
| 51 | H | -6.124195  | 0.580850  | 1.663444  |
| 52 | H | 4.737156   | -0.553083 | 2.524996  |
| 53 | H | 2.186523   | 3.575345  | 1.112118  |
| 54 | H | 4.044277   | 4.524476  | -0.250421 |

|    |   |            |           |           |
|----|---|------------|-----------|-----------|
| 55 | H | 4.722774   | 3.410921  | -2.384977 |
| 56 | H | 3.534750   | 1.348414  | -3.140847 |
| 57 | H | 1.637534   | 0.412009  | -1.782540 |
| 58 | H | -0.032550  | 2.629637  | -1.427517 |
| 59 | H | -1.691455  | 2.097960  | -1.391087 |
| 60 | H | -0.461772  | 4.486150  | 0.217825  |
| 61 | H | -1.447763  | 4.660855  | -1.253359 |
| 62 | H | -2.202894  | 4.085283  | 0.245943  |
| 63 | H | 6.736415   | -2.768843 | 3.548175  |
| 64 | H | 6.621319   | -1.004101 | 3.442643  |
| 65 | H | 6.304187   | -0.951514 | 6.004049  |
| 66 | H | 6.521751   | -2.707272 | 6.006174  |
| 67 | H | -7.945780  | 1.354946  | 0.512311  |
| 68 | H | -7.795965  | 2.870829  | 1.419142  |
| 69 | H | -7.629719  | 4.155562  | -0.733958 |
| 70 | H | -7.621548  | 2.638150  | -1.650129 |
| 71 | H | 8.701081   | -3.591950 | 6.143150  |
| 72 | H | 8.854735   | -2.379581 | 7.456127  |
| 73 | H | 10.756669  | -2.758156 | 5.044667  |
| 74 | H | 11.138688  | -3.049142 | 6.779564  |
| 75 | H | 10.482094  | -0.345346 | 4.349879  |
| 76 | H | 10.646523  | 0.879793  | 5.659045  |
| 77 | H | 8.201446   | 0.426024  | 4.965907  |
| 78 | H | 8.540723   | 0.163650  | 6.705880  |
| 79 | H | -9.489621  | 2.731505  | -2.924102 |
| 80 | H | -9.836165  | 4.433557  | -2.487820 |
| 81 | H | -11.736721 | 2.025240  | -2.101167 |
| 82 | H | -11.957866 | 3.406864  | -3.235579 |
| 83 | H | -11.956153 | 2.542520  | 0.348329  |
| 84 | H | -12.312270 | 4.253082  | 0.775776  |

|    |    |            |           |           |
|----|----|------------|-----------|-----------|
| 85 | H  | -9.876799  | 3.570501  | 1.195208  |
| 86 | H  | -10.036081 | 4.956086  | 0.073096  |
| 87 | Br | -0.774896  | -0.753622 | -1.959220 |

-----

Geometry optimization of S2 molecules.

Final Coordinates (Angstroms)

-----

| ATOM | X         | Y         | Z         |
|------|-----------|-----------|-----------|
| 1 C  | -1.258316 | -3.863454 | 1.683005  |
| 2 C  | -1.491996 | -2.566287 | 1.216581  |
| 3 C  | -0.401371 | -1.666890 | 1.033883  |
| 4 C  | 0.935998  | -2.094341 | 1.318645  |
| 5 C  | 1.134617  | -3.404971 | 1.814145  |
| 6 C  | 0.063995  | -4.275558 | 1.997018  |
| 7 C  | -0.641270 | -0.323646 | 0.557441  |
| 8 N  | 0.422491  | 0.449831  | 0.127283  |
| 9 C  | 1.768772  | 0.072913  | 0.415447  |
| 10 C | 2.029557  | -1.165503 | 1.080110  |
| 11 C | 2.834856  | 0.927756  | 0.061513  |
| 12 C | 4.151626  | 0.610922  | 0.423382  |
| 13 C | 4.419670  | -0.580256 | 1.139311  |
| 14 C | 3.372563  | -1.447152 | 1.442911  |
| 15 N | 5.231851  | 1.503607  | 0.123250  |
| 16 N | -2.301094 | -4.826525 | 1.876107  |
| 17 C | -2.053123 | 0.138741  | 0.277953  |
| 18 C | -2.623950 | -0.057923 | -1.003575 |

|    |   |           |            |           |
|----|---|-----------|------------|-----------|
| 19 | C | -3.934624 | 0.375857   | -1.266317 |
| 20 | C | -4.690116 | 0.994249   | -0.253946 |
| 21 | C | -4.136421 | 1.165531   | 1.026131  |
| 22 | C | -2.827848 | 0.731988   | 1.300581  |
| 23 | C | 0.163394  | 1.854254   | -0.394523 |
| 24 | C | 0.322783  | 2.947985   | 0.691470  |
| 25 | C | -3.545323 | -4.918442  | 1.231678  |
| 26 | C | -4.346100 | -6.179716  | 1.579543  |
| 27 | O | -3.954191 | -4.061118  | 0.398103  |
| 28 | C | -3.803875 | -7.472940  | 0.866924  |
| 29 | N | -4.744075 | -8.605356  | 1.057167  |
| 30 | C | 5.274625  | 2.439758   | -0.917972 |
| 31 | C | 6.459421  | 3.408108   | -0.915529 |
| 32 | C | 5.927482  | 4.868134   | -1.082384 |
| 33 | N | 7.029632  | 5.858087   | -1.238732 |
| 34 | O | 4.369240  | 2.515111   | -1.801202 |
| 35 | C | -4.183083 | -9.951756  | 1.386364  |
| 36 | C | -3.810599 | -10.767222 | 0.104873  |
| 37 | N | -4.938233 | -10.839660 | -0.870097 |
| 38 | C | -5.470772 | -9.483346  | -1.205500 |
| 39 | C | -5.872227 | -8.678584  | 0.075453  |
| 40 | C | 6.659202  | 7.257439   | -0.831000 |
| 41 | C | 5.753855  | 7.952865   | -1.900959 |
| 42 | N | 6.363191  | 7.926731   | -3.264633 |
| 43 | C | 6.786464  | 6.552978   | -3.673030 |
| 44 | C | 7.685161  | 5.864450   | -2.592088 |
| 45 | C | 7.308123  | 9.027129   | -3.571576 |
| 46 | C | -5.960757 | -11.885302 | -0.616445 |
| 47 | H | -2.499914 | -2.251269  | 0.985490  |
| 48 | H | 2.137691  | -3.750731  | 2.043644  |



|    |   |           |            |           |
|----|---|-----------|------------|-----------|
| 49 | H | 0.242216  | -5.291518  | 2.349572  |
| 50 | H | 2.659404  | 1.841588   | -0.482355 |
| 51 | H | 5.439248  | -0.822074  | 1.433265  |
| 52 | H | 3.597029  | -2.364192  | 1.979895  |
| 53 | H | 6.042330  | 1.458333   | 0.739668  |
| 54 | H | -2.076339 | -5.578872  | 2.526930  |
| 55 | H | -2.047561 | -0.549107  | -1.786114 |
| 56 | H | -4.367158 | 0.221077   | -2.253513 |
| 57 | H | -5.704858 | 1.329814   | -0.461642 |
| 58 | H | -4.714911 | 1.641098   | 1.816933  |
| 59 | H | -2.363944 | 0.853258   | 2.282958  |
| 60 | H | 0.829892  | 2.013310   | -1.251290 |
| 61 | H | -0.859517 | 1.856124   | -0.772672 |
| 62 | H | 0.062927  | 3.920548   | 0.246156  |
| 63 | H | -0.328522 | 2.737283   | 1.548336  |
| 64 | H | 1.347250  | 2.998573   | 1.077954  |
| 65 | H | -4.364861 | -6.364484  | 2.664972  |
| 66 | H | -5.376362 | -5.995364  | 1.257287  |
| 67 | H | -3.623492 | -7.242247  | -0.199790 |
| 68 | H | -2.835777 | -7.753390  | 1.307857  |
| 69 | H | 7.066243  | 3.338522   | -0.001804 |
| 70 | H | 7.104819  | 3.155693   | -1.769631 |
| 71 | H | 5.205529  | 4.862842   | -1.917904 |
| 72 | H | 5.369831  | 5.143838   | -0.175838 |
| 73 | H | -4.951602 | -10.499131 | 1.957415  |
| 74 | H | -3.309629 | -9.823405  | 2.042815  |
| 75 | H | -3.511138 | -11.792330 | 0.367019  |
| 76 | H | -2.955274 | -10.284489 | -0.398876 |
| 77 | H | -6.331266 | -9.600691  | -1.880647 |
| 78 | H | -4.682393 | -8.939895  | -1.751915 |

|    |    |           |            |           |
|----|----|-----------|------------|-----------|
| 79 | H  | -6.731209 | -9.164936  | 0.566595  |
| 80 | H  | -6.178845 | -7.656947  | -0.185722 |
| 81 | H  | 7.593049  | 7.827226   | -0.703902 |
| 82 | H  | 6.152190  | 7.217160   | 0.142875  |
| 83 | H  | 5.554981  | 8.999421   | -1.629506 |
| 84 | H  | 4.783680  | 7.432526   | -1.946870 |
| 85 | H  | 7.312886  | 6.614886   | -4.635587 |
| 86 | H  | 5.880245  | 5.945916   | -3.831692 |
| 87 | H  | 8.635936  | 6.409374   | -2.493337 |
| 88 | H  | 7.924094  | 4.831397   | -2.880829 |
| 89 | H  | 8.259135  | 9.015710   | -2.994431 |
| 90 | H  | 7.558536  | 8.993224   | -4.642215 |
| 91 | H  | 6.804029  | 9.984469   | -3.372700 |
| 92 | H  | -6.620604 | -11.700488 | 0.259373  |
| 93 | H  | -6.597630 | -11.978736 | -1.508749 |
| 94 | H  | -5.451300 | -12.847964 | -0.459301 |
| 95 | Br | -0.202068 | 0.703574   | 3.570360  |

-----

Geometry optimization of S3 molecules.

Final Coordinates (Angstroms)

-----

| ATOM | X | Y         | Z         |           |
|------|---|-----------|-----------|-----------|
| 1    | C | -2.327084 | -2.429860 | -2.913760 |
| 2    | C | -2.173468 | -1.725006 | -1.714441 |
| 3    | C | -0.971566 | -1.006939 | -1.457834 |
| 4    | C | 0.087100  | -0.994383 | -2.423926 |
| 5    | C | -0.082600 | -1.750680 | -3.608808 |
| 6    | C | -1.255927 | -2.459949 | -3.849107 |

|    |   |           |           |           |
|----|---|-----------|-----------|-----------|
| 7  | C | -0.825547 | -0.261794 | -0.226958 |
| 8  | N | 0.198993  | 0.653255  | -0.094553 |
| 9  | C | 1.306317  | 0.650118  | -0.992646 |
| 10 | C | 1.279141  | -0.205823 | -2.137614 |
| 11 | C | 2.420184  | 1.484428  | -0.742636 |
| 12 | C | 3.526216  | 1.465523  | -1.602666 |
| 13 | C | 3.527814  | 0.597256  | -2.722426 |
| 14 | C | 2.426674  | -0.214634 | -2.972029 |
| 15 | N | 4.681763  | 2.276336  | -1.374140 |
| 16 | N | -3.526950 | -3.106953 | -3.287645 |
| 17 | C | -1.958391 | -0.252183 | 0.770738  |
| 18 | C | -3.016535 | 0.679789  | 0.634220  |
| 19 | C | -4.107731 | 0.647537  | 1.519129  |
| 20 | C | -4.162160 | -0.319844 | 2.538214  |
| 21 | C | -3.118169 | -1.249693 | 2.671236  |
| 22 | C | -2.018998 | -1.219527 | 1.796518  |
| 23 | C | 0.286829  | 1.504231  | 1.159388  |
| 24 | C | 1.132826  | 0.851694  | 2.280846  |
| 25 | C | -4.811276 | -3.004002 | -2.725446 |
| 26 | C | -5.925031 | -3.616357 | -3.576472 |
| 27 | O | -5.049958 | -2.365479 | -1.660108 |
| 28 | C | -6.556160 | -2.528594 | -4.529975 |
| 29 | N | -7.660695 | -3.090021 | -5.338005 |
| 30 | C | 4.820141  | 3.379221  | -0.518016 |
| 31 | C | 6.222786  | 3.992826  | -0.475406 |
| 32 | C | 6.676769  | 4.296837  | 0.988366  |
| 33 | N | 8.090427  | 4.755360  | 1.025158  |
| 34 | O | 3.867674  | 3.829334  | 0.185073  |
| 35 | C | -7.656333 | -2.834334 | -6.806742 |
| 36 | C | -8.323862 | -1.476057 | -7.191164 |

|    |   |           |           |           |
|----|---|-----------|-----------|-----------|
| 37 | C | -9.756880 | -1.383715 | -6.582878 |
| 38 | C | -9.723115 | -1.633022 | -5.046862 |
| 39 | C | -9.025170 | -2.996584 | -4.736781 |
| 40 | C | 8.842289  | 4.449213  | 2.281098  |
| 41 | C | 8.566494  | 5.467268  | 3.436777  |
| 42 | C | 8.841228  | 6.922737  | 2.953274  |
| 43 | C | 8.055501  | 7.233565  | 1.643890  |
| 44 | C | 8.350630  | 6.150776  | 0.554465  |
| 45 | H | -2.974951 | -1.719086 | -0.990249 |
| 46 | H | 0.701100  | -1.773581 | -4.359324 |
| 47 | H | -1.364443 | -3.024090 | -4.776577 |
| 48 | H | 2.456835  | 2.135014  | 0.115339  |
| 49 | H | 4.391442  | 0.564686  | -3.386365 |
| 50 | H | 2.456888  | -0.880748 | -3.828361 |
| 51 | H | 5.510228  | 2.015409  | -1.908639 |
| 52 | H | -3.453546 | -3.679771 | -4.128070 |
| 53 | H | -2.989825 | 1.418184  | -0.166834 |
| 54 | H | -4.914622 | 1.369510  | 1.405177  |
| 55 | H | -5.010796 | -0.348727 | 3.219787  |
| 56 | H | -3.156262 | -2.006868 | 3.452753  |
| 57 | H | -1.200473 | -1.935279 | 1.878273  |
| 58 | H | 0.694243  | 2.472012  | 0.852995  |
| 59 | H | -0.738732 | 1.672766  | 1.494047  |
| 60 | H | 2.046011  | 0.397355  | 1.880841  |
| 61 | H | 1.404943  | 1.621698  | 3.016916  |
| 62 | H | 0.580487  | 0.044262  | 2.773773  |
| 63 | H | -5.577284 | -4.457012 | -4.193646 |
| 64 | H | -6.703000 | -3.984703 | -2.897908 |
| 65 | H | -6.881123 | -1.677514 | -3.904592 |
| 66 | H | -5.773400 | -2.158996 | -5.207178 |

|    |    |            |           |           |
|----|----|------------|-----------|-----------|
| 67 | H  | 6.974542   | 3.341341  | -0.942193 |
| 68 | H  | 6.198225   | 4.934097  | -1.045718 |
| 69 | H  | 5.954011   | 5.003258  | 1.439821  |
| 70 | H  | 6.624383   | 3.364973  | 1.568732  |
| 71 | H  | -8.202811  | -3.659171 | -7.298746 |
| 72 | H  | -6.618287  | -2.871560 | -7.165029 |
| 73 | H  | -8.368145  | -1.370497 | -8.286450 |
| 74 | H  | -7.703935  | -0.647012 | -6.810055 |
| 75 | H  | -10.392211 | -2.155007 | -7.054364 |
| 76 | H  | -10.214988 | -0.407178 | -6.809040 |
| 77 | H  | -10.742357 | -1.631961 | -4.628189 |
| 78 | H  | -9.168059  | -0.818137 | -4.552216 |
| 79 | H  | -9.636499  | -3.822178 | -5.140334 |
| 80 | H  | -8.939136  | -3.157888 | -3.653377 |
| 81 | H  | 9.919346   | 4.467070  | 2.038134  |
| 82 | H  | 8.592741   | 3.424661  | 2.586469  |
| 83 | H  | 9.201543   | 5.224901  | 4.303068  |
| 84 | H  | 7.517389   | 5.379639  | 3.764883  |
| 85 | H  | 9.923461   | 7.046639  | 2.766118  |
| 86 | H  | 8.567531   | 7.644057  | 3.736696  |
| 87 | H  | 8.327865   | 8.228507  | 1.257882  |
| 88 | H  | 6.974546   | 7.253285  | 1.860444  |
| 89 | H  | 9.414310   | 6.203725  | 0.270430  |
| 90 | H  | 7.758987   | 6.336285  | -0.352859 |
| 91 | Br | 1.114935   | -2.548037 | 0.793593  |

-----

Geometry optimization of S4 molecules.

Final Coordinates (Angstroms)

-----

| ATOM | X         | Y         | Z         |
|------|-----------|-----------|-----------|
| 1 C  | -0.499824 | -4.092056 | 1.024417  |
| 2 C  | -0.932100 | -2.805047 | 0.694540  |
| 3 C  | 0.014233  | -1.746507 | 0.559935  |
| 4 C  | 1.414304  | -1.991501 | 0.770632  |
| 5 C  | 1.813937  | -3.302656 | 1.129729  |
| 6 C  | 0.885565  | -4.333120 | 1.251930  |
| 7 C  | -0.430758 | -0.437231 | 0.167047  |
| 8 N  | 0.488815  | 0.520495  | -0.205531 |
| 9 C  | 1.872885  | 0.368156  | 0.098599  |
| 10 C | 2.342028  | -0.878849 | 0.622518  |
| 11 C | 2.763923  | 1.445431  | -0.112372 |
| 12 C | 4.124475  | 1.310805  | 0.195415  |
| 13 C | 4.600549  | 0.090716  | 0.742021  |
| 14 C | 3.721885  | -0.968310 | 0.949764  |
| 15 N | 5.059702  | 2.371412  | -0.011835 |
| 16 N | -1.377074 | -5.216205 | 1.117699  |
| 17 C | -1.895338 | -0.147225 | -0.031370 |
| 18 C | -2.530943 | -0.469022 | -1.254272 |
| 19 C | -3.892655 | -0.172179 | -1.438382 |
| 20 C | -4.630295 | 0.427799  | -0.402331 |
| 21 C | -4.007659 | 0.723867  | 0.822671  |
| 22 C | -2.644982 | 0.430987  | 1.017451  |
| 23 C | 0.004811  | 1.859821  | -0.737374 |
| 24 C | -0.238500 | 2.902481  | 0.386730  |
| 25 C | -2.728587 | -5.318783 | 0.752891  |
| 26 C | -3.310733 | -6.731724 | 0.816906  |
| 27 O | -3.407537 | -4.340382 | 0.324883  |
| 28 C | -3.558310 | -7.294225 | -0.637397 |
| 29 N | -4.329140 | -8.538243 | -0.657503 |

|    |   |           |            |           |
|----|---|-----------|------------|-----------|
| 30 | C | 4.888866  | 3.542621   | -0.765738 |
| 31 | C | 6.127337  | 4.444316   | -0.860374 |
| 32 | C | 5.736911  | 5.949089   | -0.799255 |
| 33 | N | 6.921259  | 6.832019   | -0.858438 |
| 34 | O | 3.797678  | 3.839778   | -1.334982 |
| 35 | C | -3.751843 | -9.767087  | -1.287309 |
| 36 | C | -5.001294 | -10.603244 | -1.706813 |
| 37 | C | -6.101369 | -9.524325  | -1.953531 |
| 38 | C | -5.811444 | -8.480290  | -0.831255 |
| 39 | C | 6.734306  | 8.205717   | -0.286618 |
| 40 | C | 7.943328  | 8.991514   | -0.853354 |
| 41 | C | 8.053713  | 8.442285   | -2.313075 |
| 42 | C | 7.607707  | 6.945143   | -2.199301 |
| 43 | H | -1.985950 | -2.621134  | 0.532367  |
| 44 | H | 2.863897  | -3.524758  | 1.302600  |
| 45 | H | 1.219620  | -5.338663  | 1.505826  |
| 46 | H | 2.426445  | 2.394519   | -0.493980 |
| 47 | H | 5.654444  | -0.018652  | 0.998665  |
| 48 | H | 4.112719  | -1.884110  | 1.382160  |
| 49 | H | 5.982204  | 2.233729   | 0.401141  |
| 50 | H | -0.952392 | -6.066231  | 1.486380  |
| 51 | H | -1.962723 | -0.955778  | -2.045355 |
| 52 | H | -4.380474 | -0.429154  | -2.377358 |
| 53 | H | -5.686221 | 0.653787   | -0.550135 |
| 54 | H | -4.578376 | 1.173013   | 1.634279  |
| 55 | H | -2.134477 | 0.619796   | 1.965207  |
| 56 | H | 0.758271  | 2.196240   | -1.454467 |
| 57 | H | -0.913813 | 1.657370   | -1.294086 |
| 58 | H | -0.173986 | 3.916759   | -0.031358 |
| 59 | H | -1.230152 | 2.761990   | 0.833403  |

|    |    |           |            |           |
|----|----|-----------|------------|-----------|
| 60 | H  | 0.482244  | 2.775874   | 1.203935  |
| 61 | H  | -2.672949 | -7.430749  | 1.376055  |
| 62 | H  | -4.281412 | -6.679194  | 1.325137  |
| 63 | H  | -4.076684 | -6.498036  | -1.204973 |
| 64 | H  | -2.583474 | -7.467744  | -1.124189 |
| 65 | H  | 6.850480  | 4.229663   | -0.060071 |
| 66 | H  | 6.633819  | 4.236983   | -1.818590 |
| 67 | H  | 5.015456  | 6.160865   | -1.615814 |
| 68 | H  | 5.218688  | 6.141694   | 0.150403  |
| 69 | H  | -3.109622 | -10.324639 | -0.586166 |
| 70 | H  | -3.136203 | -9.499894  | -2.169508 |
| 71 | H  | -5.304675 | -11.259649 | -0.879306 |
| 72 | H  | -4.805320 | -11.231764 | -2.585714 |
| 73 | H  | -5.957553 | -9.053490  | -2.939393 |
| 74 | H  | -7.119941 | -9.929990  | -1.911314 |
| 75 | H  | -6.340857 | -8.748060  | 0.101248  |
| 76 | H  | -6.121879 | -7.459809  | -1.107686 |
| 77 | H  | 6.719612  | 8.156431   | 0.810730  |
| 78 | H  | 5.783489  | 8.674558   | -0.624067 |
| 79 | H  | 8.850019  | 8.746606   | -0.281759 |
| 80 | H  | 7.791389  | 10.077659  | -0.823614 |
| 81 | H  | 7.365061  | 8.995306   | -2.969059 |
| 82 | H  | 9.065841  | 8.544299   | -2.727123 |
| 83 | H  | 8.469542  | 6.260896   | -2.240689 |
| 84 | H  | 6.922069  | 6.674546   | -3.024483 |
| 85 | Br | 0.128893  | 0.659875   | 3.261455  |

-----

**Table S2** .RMSD and RMSF values of RMSD-S1- Meldonium.



| <b>Index</b> | <b>RMSD-S1- Meldonium</b> | <b>Residue</b> | <b>RMSF-S1- Meldonium</b> |
|--------------|---------------------------|----------------|---------------------------|
| 1            | 0                         | UNK0           | 14.816                    |
| 2            | 8.73079                   | TIP2           | 14.8243                   |
| 3            | 10.2276                   | TIP3           | 14.1111                   |
| 4            | 11.3352                   | TIP4           | 14.432                    |
| 5            | 12.0494                   | TIP5           | 13.6014                   |
| 6            | 12.4452                   | TIP6           | 12.969                    |
| 7            | 13.3419                   | TIP7           | 14.2314                   |
| 8            | 13.8415                   | TIP8           | 13.1088                   |
| 9            | 14.8003                   | TIP9           | 13.3696                   |
| 10           | 14.7049                   | TIP10          | 15.6459                   |
| 11           | 14.424                    | TIP11          | 14.09                     |
| 12           | 15.2005                   | TIP12          | 13.6044                   |
| 13           | 15.3578                   | TIP13          | 13.62                     |
| 14           | 15.6868                   | TIP14          | 11.2982                   |
| 15           | 15.6887                   | TIP15          | 14.8899                   |
| 16           | 16.1998                   | TIP16          | 13.7681                   |
| 17           | 16.5662                   | TIP17          | 13.6819                   |
| 18           | 16.477                    | TIP18          | 13.1569                   |
| 19           | 16.6734                   | TIP19          | 13.4144                   |
| 20           | 16.5101                   | TIP20          | 14.1941                   |
| 21           | 16.2077                   | TIP21          | 14.1524                   |
| 22           | 16.5404                   | TIP22          | 13.0802                   |
| 23           | 16.6126                   | TIP23          | 15.5516                   |
| 24           | 17.0303                   | TIP24          | 14.623                    |
| 25           | 16.8764                   | TIP25          | 13.5246                   |
| 26           | 17.2973                   | TIP26          | 14.5072                   |
| 27           | 17.1801                   | TIP27          | 15.2949                   |
| 28           | 17.181                    | TIP28          | 12.9394                   |
| 29           | 17.4978                   | TIP29          | 13.7524                   |
| 30           | 17.5463                   | TIP30          | 14.0876                   |
| 31           | 17.5465                   | TIP31          | 12.8411                   |
| 32           | 17.5971                   | TIP32          | 13.4616                   |
| 33           | 17.172                    | TIP33          | 12.6096                   |
| 34           | 17.3968                   | TIP34          | 13.3945                   |
| 35           | 17.6357                   | TIP35          | 13.0999                   |
| 36           | 17.5952                   | TIP36          | 14.3107                   |
| 37           | 17.8313                   | TIP37          | 14.8011                   |
| 38           | 17.7494                   | TIP38          | 14.9823                   |
| 39           | 18.0497                   | TIP39          | 14.6286                   |
| 40           | 17.8314                   | TIP40          | 15.2085                   |
| 41           | 17.7813                   | TIP41          | 14.1443                   |
| 42           | 17.9667                   | TIP42          | 14.4224                   |
| 43           | 18.1086                   | TIP43          | 12.2002                   |

|    |         |       |         |
|----|---------|-------|---------|
| 44 | 18.1522 | TIP44 | 14.8976 |
| 45 | 18.1639 | TIP45 | 13.6956 |
| 46 | 18.4211 | TIP46 | 12.9906 |
| 47 | 18.4766 | TIP47 | 15.2814 |
| 48 | 18.1655 | TIP48 | 14.0541 |
| 49 | 18.2986 | TIP49 | 14.7594 |
| 50 | 18.5541 | TIP50 | 15.3311 |
| 51 | 18.7327 | TIP51 | 13.7123 |
| 52 | 18.6389 | TIP52 | 13.9261 |
| 53 | 18.4944 | TIP53 | 13.9274 |
| 54 | 18.3696 | TIP54 | 14.8965 |
| 55 | 18.4984 | TIP55 | 15.0876 |
| 56 | 18.6814 | TIP56 | 14.177  |
| 57 | 18.8033 | TIP57 | 13.4158 |
| 58 | 18.7864 | TIP58 | 12.1791 |
| 59 | 18.827  | TIP59 | 12.7774 |
| 60 | 18.8576 | TIP60 | 13.5979 |
| 61 | 18.7158 | TIP61 | 15.8276 |
| 62 | 19.1429 | TIP62 | 14.3091 |
| 63 | 19.3077 | TIP63 | 14.3921 |
| 64 | 19.1877 | TIP64 | 12.6851 |
| 65 | 18.8657 | TIP65 | 13.306  |
| 66 | 18.9073 | TIP66 | 14.7448 |
| 67 | 18.7343 | TIP67 | 13.9078 |
| 68 | 18.5192 | TIP68 | 14.2032 |
| 69 | 18.8873 | TIP69 | 13.1517 |
| 70 | 18.8886 | TIP70 | 16.3959 |
| 71 | 18.7544 | TIP71 | 13.4927 |
| 72 | 18.7274 | TIP72 | 12.1403 |
| 73 | 18.7503 | TIP73 | 14.2157 |
| 74 | 19.1369 | TIP74 | 15.3538 |
| 75 | 19.2969 | TIP75 | 12.8418 |
| 76 | 19.1572 | TIP76 | 15.6967 |
| 77 | 18.9156 | TIP77 | 13.9454 |
| 78 | 19.0347 | TIP78 | 14.8136 |
| 79 | 19.5467 | TIP79 | 13.8257 |
| 80 | 19.4785 | TIP80 | 13.9999 |
| 81 | 19.323  | TIP81 | 14.0798 |
| 82 | 19.0456 | TIP82 | 16.4642 |
| 83 | 19.2767 | TIP83 | 11.0467 |
| 84 | 19.2177 | TIP84 | 13.1498 |
| 85 | 19.0698 | TIP85 | 15.6235 |
| 86 | 19.253  | TIP86 | 13.7156 |
| 87 | 19.5114 | TIP87 | 13.8709 |
| 88 | 19.7273 | TIP88 | 13.9648 |

|     |         |        |         |
|-----|---------|--------|---------|
| 89  | 19.6201 | TIP89  | 14.3699 |
| 90  | 19.7205 | TIP90  | 14.2517 |
| 91  | 19.3678 | TIP91  | 15.3352 |
| 92  | 19.6368 | TIP92  | 13.708  |
| 93  | 19.5305 | TIP93  | 13.0015 |
| 94  | 19.7596 | TIP94  | 13.6441 |
| 95  | 19.6605 | TIP95  | 14.5124 |
| 96  | 19.5057 | TIP96  | 13.9624 |
| 97  | 19.4909 | TIP97  | 15.35   |
| 98  | 19.5515 | TIP98  | 14.5494 |
| 99  | 19.4492 | TIP99  | 13.0326 |
| 100 | 19.4783 | TIP100 | 14.9309 |
| 101 | 19.9049 | TIP101 | 14.0004 |
| 102 | 19.7994 | TIP102 | 14.9181 |
| 103 | 20.0488 | TIP103 | 14.5847 |
| 104 | 20.0848 | TIP104 | 15.1767 |
| 105 | 20.1583 | TIP105 | 15.0799 |
| 106 | 19.9986 | TIP106 | 13.5795 |
| 107 | 19.7305 | TIP107 | 14.8132 |
| 108 | 19.7534 | TIP108 | 13.6313 |
| 109 | 19.7595 | TIP109 | 14.6167 |
| 110 | 19.7906 | TIP110 | 14.2911 |
| 111 | 20.1858 | TIP111 | 15.5219 |
| 112 | 20.3975 | TIP112 | 13.6771 |
| 113 | 20.0611 | TIP113 | 14.1456 |
| 114 | 20.1768 | TIP114 | 13.1171 |
| 115 | 20.1066 | TIP115 | 15.8476 |
| 116 | 20.5466 | TIP116 | 15.7629 |
| 117 | 20.6647 | TIP117 | 14.2298 |
| 118 | 20.5173 | TIP118 | 13.3305 |
| 119 | 20.2186 | TIP119 | 14.2564 |
| 120 | 20.3493 | TIP120 | 13.5829 |
| 121 | 20.3046 | TIP121 | 11.7389 |
| 122 | 20.3495 | TIP122 | 13.2351 |
| 123 | 20.2219 | TIP123 | 14.7235 |
| 124 | 20.2574 | TIP124 | 15.5683 |
| 125 | 20.2906 | TIP125 | 13.3175 |
| 126 | 20.1472 | TIP126 | 14.3806 |
| 127 | 20.5014 | TIP127 | 13.4497 |
| 128 | 20.5176 | TIP128 | 15.1857 |
| 129 | 20.5395 | TIP129 | 16.1006 |
| 130 | 20.2773 | TIP130 | 13.904  |
| 131 | 20.2224 | TIP131 | 14.0259 |
| 132 | 20.1138 | TIP132 | 12.9611 |
| 133 | 20.6196 | TIP133 | 14.1763 |

|     |         |        |         |
|-----|---------|--------|---------|
| 134 | 20.1277 | TIP134 | 13.4786 |
| 135 | 20.0555 | TIP135 | 14.9142 |
| 136 | 20.1328 | TIP136 | 13.305  |
| 137 | 20.1604 | TIP137 | 14.638  |
| 138 | 20.4618 | TIP138 | 14.9514 |
| 139 | 20.5708 | TIP139 | 15.9253 |
| 140 | 20.6024 | TIP140 | 12.3836 |
| 141 | 20.7859 | TIP141 | 15.1343 |
| 142 | 20.8223 | TIP142 | 13.1423 |
| 143 | 20.7689 | TIP143 | 15.797  |
| 144 | 20.3163 | TIP144 | 14.6513 |
| 145 | 20.3679 | TIP145 | 13.7235 |
| 146 | 20.5027 | TIP146 | 13.039  |
| 147 | 20.8804 | TIP147 | 14.4307 |
| 148 | 20.8379 | TIP148 | 12.1072 |
| 149 | 20.5936 | TIP149 | 13.543  |
| 150 | 20.6823 | TIP150 | 15.3785 |
| 151 | 20.6793 | TIP151 | 15.4522 |
| 152 | 20.5219 | TIP152 | 14.222  |
| 153 | 20.2795 | TIP153 | 16.1817 |
| 154 | 19.9447 | TIP154 | 14.3372 |
| 155 | 20.1867 | TIP155 | 13.7188 |
| 156 | 19.6616 | TIP156 | 14.0227 |
| 157 | 19.7106 | TIP157 | 12.1254 |
| 158 | 19.9566 | TIP158 | 12.3938 |
| 159 | 20.1508 | TIP159 | 14.1075 |
| 160 | 19.9604 | TIP160 | 14.6439 |
| 161 | 20.1237 | TIP161 | 13.782  |
| 162 | 19.8788 | TIP162 | 13.3208 |
| 163 | 20.0465 | TIP163 | 13.977  |
| 164 | 20.0195 | TIP164 | 12.5591 |
| 165 | 20.3306 | TIP165 | 13.9766 |
| 166 | 20.037  | TIP166 | 11.4105 |
| 167 | 19.9195 | TIP167 | 13.9384 |
| 168 | 20.0183 | TIP168 | 13.9571 |
| 169 | 19.8594 | TIP169 | 13.6468 |
| 170 | 19.8007 | TIP170 | 14.0659 |
| 171 | 19.5487 | TIP171 | 13.3158 |
| 172 | 19.4698 | TIP172 | 14.6913 |
| 173 | 19.6438 | TIP173 | 14.1232 |
| 174 | 19.465  | TIP174 | 13.6744 |
| 175 | 19.478  | TIP175 | 13.7515 |
| 176 | 19.7806 | TIP176 | 12.2295 |
| 177 | 19.6623 | TIP177 | 13.2768 |
| 178 | 19.5822 | TIP178 | 13.9981 |

|     |         |        |         |
|-----|---------|--------|---------|
| 179 | 19.4694 | TIP179 | 14.2667 |
| 180 | 19.6789 | TIP180 | 14.5405 |
| 181 | 19.8518 | TIP181 | 13.5779 |
| 182 | 19.8693 | TIP182 | 15.963  |
| 183 | 19.8104 | TIP183 | 13.3429 |
| 184 | 20.1481 | TIP184 | 15.0176 |
| 185 | 20.2091 | TIP185 | 13.3275 |
| 186 | 19.9174 | TIP186 | 14.3653 |
| 187 | 20.2508 | TIP187 | 15.5262 |
| 188 | 20.538  | TIP188 | 13.6346 |
| 189 | 20.3839 | TIP189 | 13.9095 |
| 190 | 20.2081 | TIP190 | 13.9733 |
| 191 | 20.2012 | TIP191 | 13.8609 |
| 192 | 20.4593 | TIP192 | 11.5993 |
| 193 | 20.4427 | TIP193 | 13.1814 |
| 194 | 20.3764 | TIP194 | 12.4844 |
| 195 | 20.2708 | TIP195 | 14.1715 |
| 196 | 20.0632 | TIP196 | 13.73   |
| 197 | 19.9684 | TIP197 | 12.5962 |
| 198 | 20.2142 | TIP198 | 15.6934 |
| 199 | 20.3269 | TIP199 | 14.2309 |
| 200 | 20.3097 | TIP200 | 13.3302 |
| 201 | 19.9009 | TIP201 | 12.5303 |
| 202 | 20.3446 | TIP202 | 15.0141 |
| 203 | 20.1641 | TIP203 | 14.3467 |
| 204 | 20.2248 | TIP204 | 14.3973 |
| 205 | 20.3414 | TIP205 | 13.071  |
| 206 | 20.0951 | TIP206 | 13.2326 |
| 207 | 20.1357 | TIP207 | 14.7099 |
| 208 | 20.2151 | TIP208 | 11.9778 |
| 209 | 20.3036 | TIP209 | 15.3669 |
| 210 | 19.9934 | TIP210 | 14.9257 |
| 211 | 20.1133 | TIP211 | 13.5272 |
| 212 | 19.8787 | TIP212 | 12.9397 |
| 213 | 19.7505 | TIP213 | 14.1298 |
| 214 | 19.704  | TIP214 | 15.5629 |
| 215 | 20.0618 | TIP215 | 15.0779 |
| 216 | 19.7688 | TIP216 | 13.4887 |
| 217 | 19.6672 | TIP217 | 13.5008 |
| 218 | 19.4506 | TIP218 | 15.3552 |
| 219 | 19.4926 | TIP219 | 12.75   |
| 220 | 19.6947 | TIP220 | 13.5559 |
| 221 | 19.8527 | TIP221 | 15.0464 |
| 222 | 19.4988 | TIP222 | 13.7507 |
| 223 | 19.517  | TIP223 | 13.23   |

|     |         |        |         |
|-----|---------|--------|---------|
| 224 | 19.5207 | TIP224 | 15.2596 |
| 225 | 19.6093 | TIP225 | 13.7918 |
| 226 | 19.7923 | TIP226 | 13.2842 |
| 227 | 19.6052 | TIP227 | 15.7789 |
| 228 | 19.7226 | TIP228 | 15.481  |
| 229 | 19.5833 | TIP229 | 15.4612 |
| 230 | 19.8742 | TIP230 | 14.4398 |
| 231 | 19.8578 | TIP231 | 14.1912 |
| 232 | 19.6531 | TIP232 | 14.7122 |
| 233 | 19.9929 | TIP233 | 14.7242 |
| 234 | 19.9333 | TIP234 | 14.7905 |
| 235 | 19.4713 | TIP235 | 14.332  |
| 236 | 19.9159 | TIP236 | 14.6133 |
| 237 | 19.8044 | TIP237 | 12.8682 |
| 238 | 19.898  | TIP238 | 13.9483 |
| 239 | 20.1044 | TIP239 | 14.4893 |
| 240 | 20.2374 | TIP240 | 14.7783 |
| 241 | 20.0392 | TIP241 | 14.4598 |
| 242 | 20.0271 | TIP242 | 15.3107 |
| 243 | 19.9495 | TIP243 | 14.2861 |
| 244 | 19.9644 | TIP244 | 13.8236 |
| 245 | 19.705  | TIP245 | 13.5168 |
| 246 | 19.8341 | TIP246 | 13.6025 |
| 247 | 19.6826 | TIP247 | 14.7765 |
| 248 | 19.9702 | TIP248 | 15.2019 |
| 249 | 20.0964 | TIP249 | 13.7132 |
| 250 | 19.5681 | TIP250 | 13.6829 |
| 251 | 19.8019 | TIP251 | 13.0889 |
| 252 | 19.9311 | TIP252 | 12.2439 |
| 253 | 19.9987 | TIP253 | 12.8698 |
| 254 | 19.9019 | TIP254 | 15.7741 |
| 255 | 19.9975 | TIP255 | 13.685  |
| 256 | 19.9243 | TIP256 | 13.5039 |
| 257 | 19.6272 | TIP257 | 14.2085 |
| 258 | 19.9236 | TIP258 | 13.9794 |
| 259 | 19.6624 | TIP259 | 14.5682 |
| 260 | 19.8253 | TIP260 | 12.1274 |
| 261 | 19.8051 | TIP261 | 14.4981 |
| 262 | 19.9901 | TIP262 | 12.0961 |
| 263 | 19.9295 | TIP263 | 13.9386 |
| 264 | 19.828  | TIP264 | 14.3801 |
| 265 | 19.9676 | TIP265 | 13.9024 |
| 266 | 19.884  | TIP266 | 13.9986 |
| 267 | 19.978  | TIP267 | 15.5124 |
| 268 | 20.0613 | TIP268 | 13.9512 |

|     |         |        |         |
|-----|---------|--------|---------|
| 269 | 20.0245 | TIP269 | 15.9246 |
| 270 | 20.4191 | TIP270 | 16.1026 |
| 271 | 20.1612 | TIP271 | 15.1885 |
| 272 | 20.2869 | TIP272 | 13.1437 |
| 273 | 20.176  | TIP273 | 16.5733 |
| 274 | 20.1736 | TIP274 | 15.5144 |
| 275 | 20.2754 | TIP275 | 14.415  |
| 276 | 20.1684 | TIP276 | 14.7287 |
| 277 | 20.0705 | TIP277 | 14.852  |
| 278 | 20.409  | TIP278 | 14.1576 |
| 279 | 20.2649 | TIP279 | 13.5774 |
| 280 | 20.2232 | TIP280 | 13.2794 |
| 281 | 20.3898 | TIP281 | 13.2163 |
| 282 | 20.1599 | TIP282 | 13.4071 |
| 283 | 20.4693 | TIP283 | 13.515  |
| 284 | 20.4288 | TIP284 | 14.5168 |
| 285 | 20.2421 | TIP285 | 15.3182 |
| 286 | 20.4371 | TIP286 | 12.175  |
| 287 | 20.2015 | TIP287 | 14.2684 |
| 288 | 20.4344 | TIP288 | 13.0678 |
| 289 | 20.3574 | TIP289 | 14.5609 |
| 290 | 20.3999 | TIP290 | 12.6744 |
| 291 | 20.6319 | TIP291 | 13.7539 |
| 292 | 20.312  | TIP292 | 13.2221 |
| 293 | 20.3051 | TIP293 | 15.1234 |
| 294 | 20.2793 | TIP294 | 14.0109 |
| 295 | 20.3007 | TIP295 | 14.2723 |
| 296 | 20.3396 | TIP296 | 13.3671 |
| 297 | 20.3208 | TIP297 | 14.0443 |
| 298 | 20.477  | TIP298 | 15.557  |
| 299 | 20.4697 | TIP299 | 14.7543 |
| 300 | 20.4879 | TIP300 | 16.0907 |
| 301 | 20.4348 | TIP301 | 13.258  |
| 302 | 20.4609 | TIP302 | 14.921  |
| 303 | 20.3163 | TIP303 | 13.4846 |
| 304 | 20.3333 | TIP304 | 13.352  |
| 305 | 20.3604 | TIP305 | 13.9813 |
| 306 | 20.2082 | TIP306 | 15.8646 |
| 307 | 20.3098 | TIP307 | 14.819  |
| 308 | 20.0839 | TIP308 | 12.7917 |
| 309 | 20.11   | TIP309 | 13.8705 |
| 310 | 20.0388 | TIP310 | 13.9009 |
| 311 | 19.9184 | TIP311 | 13.8588 |
| 312 | 20.2037 | TIP312 | 13.9745 |
| 313 | 19.7804 | TIP313 | 13.9701 |

|     |         |        |         |
|-----|---------|--------|---------|
| 314 | 19.8877 | TIP314 | 16.5064 |
| 315 | 19.4854 | TIP315 | 13.0184 |
| 316 | 19.7639 | TIP316 | 12.6935 |
| 317 | 19.6887 | TIP317 | 13.4063 |
| 318 | 19.8509 | TIP318 | 14.4987 |
| 319 | 19.8557 | TIP319 | 13.2394 |
| 320 | 20.0403 | TIP320 | 14.7222 |
| 321 | 20.0751 | TIP321 | 15.4869 |
| 322 | 20.0581 | TIP322 | 14.5414 |
| 323 | 19.8972 | TIP323 | 15.1398 |
| 324 | 19.7867 | TIP324 | 13.7863 |
| 325 | 19.7185 | TIP325 | 14.6927 |
| 326 | 19.7349 | TIP326 | 13.7399 |
| 327 | 19.7487 | TIP327 | 13.9    |
| 328 | 19.9593 | TIP328 | 11.8624 |
| 329 | 20.2655 | TIP329 | 15.1927 |
| 330 | 20.4385 | TIP330 | 13.8121 |
| 331 | 20.4453 | TIP331 | 13.332  |
| 332 | 20.498  | TIP332 | 14.0079 |
| 333 | 20.6382 | TIP333 | 13.7004 |
| 334 | 20.6409 | TIP334 | 11.799  |
| 335 | 20.4886 | TIP335 | 14.5854 |
| 336 | 20.427  | TIP336 | 13.9262 |
| 337 | 20.6306 | TIP337 | 15.1193 |
| 338 | 20.9117 | TIP338 | 13.9063 |
| 339 | 20.9042 | TIP339 | 15.2388 |
| 340 | 20.7893 | TIP340 | 13.8889 |
| 341 | 20.543  | TIP341 | 14.5763 |
| 342 | 20.5159 | TIP342 | 12.2127 |
| 343 | 20.6233 | TIP343 | 14.0713 |
| 344 | 20.9735 | TIP344 | 12.2532 |
| 345 | 20.5942 | TIP345 | 14.7616 |
| 346 | 20.8757 | TIP346 | 13.7815 |
| 347 | 20.6134 | TIP347 | 14.1184 |
| 348 | 20.9225 | TIP348 | 13.387  |
| 349 | 21.0141 | TIP349 | 13.2163 |
| 350 | 20.6235 | TIP350 | 13.4474 |
| 351 | 20.6757 | TIP351 | 13.5979 |
| 352 | 20.3263 | TIP352 | 14.3671 |
| 353 | 20.4578 | TIP353 | 14.2833 |
| 354 | 20.5693 | TIP354 | 13.1909 |
| 355 | 20.6416 | TIP355 | 12.3858 |
| 356 | 20.8191 | TIP356 | 13.2469 |
| 357 | 20.8092 | TIP357 | 13.8528 |
| 358 | 20.4962 | TIP358 | 13.3704 |



|     |         |        |         |
|-----|---------|--------|---------|
| 359 | 20.6857 | TIP359 | 15.2819 |
| 360 | 20.682  | TIP360 | 14.4556 |
| 361 | 20.709  | TIP361 | 15.1421 |
| 362 | 20.5953 | TIP362 | 12.1116 |
| 363 | 20.3668 | TIP363 | 13.4834 |
| 364 | 20.5293 | TIP364 | 13.7806 |
| 365 | 20.5654 | TIP365 | 13.9473 |
| 366 | 20.4153 | TIP366 | 15.0036 |
| 367 | 20.5516 | TIP367 | 11.4752 |
| 368 | 20.4411 | TIP368 | 13.7298 |
| 369 | 20.2037 | TIP369 | 11.1771 |
| 370 | 20.2631 | TIP370 | 14.0133 |
| 371 | 20.3036 | TIP371 | 12.9857 |
| 372 | 20.3175 | TIP372 | 13.019  |
| 373 | 20.4665 | TIP373 | 14.9307 |
| 374 | 20.3495 | TIP374 | 13.56   |
| 375 | 20.4299 | TIP375 | 13.9879 |
| 376 | 20.1896 | TIP376 | 15.7275 |
| 377 | 19.8767 | TIP377 | 13.4977 |
| 378 | 20.2968 | TIP378 | 14.6422 |
| 379 | 20.3021 | TIP379 | 13.6088 |
| 380 | 19.9189 | TIP380 | 14.486  |
| 381 | 19.896  | TIP381 | 15.7763 |
| 382 | 20.2067 | TIP382 | 13.8961 |
| 383 | 19.9611 | TIP383 | 13.7102 |
| 384 | 19.943  | TIP384 | 15.2296 |
| 385 | 20.2896 | TIP385 | 14.086  |
| 386 | 20.2207 | TIP386 | 13.9596 |
| 387 | 20.0687 | TIP387 | 13.0503 |
| 388 | 20.4014 | TIP388 | 14.3192 |
| 389 | 20.7626 | TIP389 | 13.667  |
| 390 | 20.6744 | TIP390 | 12.9762 |
| 391 | 20.489  | TIP391 | 15.0102 |
| 392 | 20.4752 | TIP392 | 15.2756 |
| 393 | 20.4023 | TIP393 | 13.5365 |
| 394 | 20.5719 | TIP394 | 12.9623 |
| 395 | 20.7881 | TIP395 | 13.3739 |
| 396 | 20.276  | TIP396 | 14.4002 |
| 397 | 20.2165 | TIP397 | 12.9547 |
| 398 | 20.4196 | TIP398 | 13.8087 |
| 399 | 20.2915 | TIP399 | 14.4968 |
| 400 | 20.408  | TIP400 | 13.7814 |
| 401 | 20.2544 | TIP401 | 15.5973 |
| 402 | 20.5183 | TIP402 | 13.5341 |
| 403 | 20.3326 | TIP403 | 14.0913 |

|     |         |        |         |
|-----|---------|--------|---------|
| 404 | 20.5185 | TIP404 | 13.2154 |
| 405 | 20.4407 | TIP405 | 14.7303 |
| 406 | 20.317  | TIP406 | 13.4941 |
| 407 | 20.4819 | TIP407 | 13.4095 |
| 408 | 20.5455 | TIP408 | 13.3613 |
| 409 | 20.5045 | TIP409 | 13.8194 |
| 410 | 20.6459 | TIP410 | 12.6185 |
| 411 | 20.503  | TIP411 | 14.0081 |
| 412 | 20.4791 | TIP412 | 14.9546 |
| 413 | 20.8982 | TIP413 | 13.7184 |
| 414 | 20.5151 | TIP414 | 14.1027 |
| 415 | 20.5199 | TIP415 | 14.8636 |
| 416 | 20.5256 | TIP416 | 13.8671 |
| 417 | 20.5395 | TIP417 | 14.8241 |
| 418 | 20.5258 | TIP418 | 13.6788 |
| 419 | 20.1255 | TIP419 | 14.6305 |
| 420 | 20.1242 | TIP420 | 14.0611 |
| 421 | 20.2137 | TIP421 | 14.09   |
| 422 | 20.0876 | TIP422 | 15.3259 |
| 423 | 20.1115 | TIP423 | 14.1181 |
| 424 | 20.0513 | TIP424 | 14.9497 |
| 425 | 20.2619 | TIP425 | 13.7145 |
| 426 | 20.5459 | TIP426 | 13.5688 |
| 427 | 20.3972 | TIP427 | 12.2492 |
| 428 | 20.3351 | TIP428 | 14.1236 |
| 429 | 20.3375 | TIP429 | 14.4399 |
| 430 | 20.4102 | TIP430 | 12.7202 |
| 431 | 20.39   | TIP431 | 13.6117 |
| 432 | 20.4257 | TIP432 | 13.9226 |
| 433 | 20.3872 | TIP433 | 12.0043 |
| 434 | 20.2323 | TIP434 | 12.6832 |
| 435 | 20.2719 | TIP435 | 13.4116 |
| 436 | 20.5637 | TIP436 | 14.1167 |
| 437 | 20.4279 | TIP437 | 13.8521 |
| 438 | 20.4562 | TIP438 | 14.448  |
| 439 | 20.3631 | TIP439 | 14.4221 |
| 440 | 20.3524 | TIP440 | 14.1835 |
| 441 | 20.2808 | TIP441 | 14.9889 |
| 442 | 20.3697 | TIP442 | 14.4191 |
| 443 | 20.2861 | TIP443 | 13.6875 |
| 444 | 20.1542 | TIP444 | 13.0142 |
| 445 | 20.1785 | TIP445 | 15.1608 |
| 446 | 20.2548 | TIP446 | 14.0371 |
| 447 | 20.1362 | TIP447 | 14.3662 |
| 448 | 20.2764 | TIP448 | 16.7945 |

|     |         |        |         |
|-----|---------|--------|---------|
| 449 | 20.2834 | TIP449 | 13.5951 |
| 450 | 20.4685 | TIP450 | 15.24   |
| 451 | 20.2099 | TIP451 | 13.7658 |
| 452 | 20.0206 | TIP452 | 15.9915 |
| 453 | 20.2465 | TIP453 | 14.457  |
| 454 | 20.1615 | TIP454 | 14.3256 |
| 455 | 20.3698 | TIP455 | 13.6291 |
| 456 | 20.3103 | TIP456 | 13.3246 |
| 457 | 20.4488 | TIP457 | 16.5404 |
| 458 | 20.3896 | TIP458 | 14.8242 |
| 459 | 20.2229 | TIP459 | 14.265  |
| 460 | 20.0506 | TIP460 | 13.3149 |
| 461 | 19.9191 | TIP461 | 15.3422 |
| 462 | 20.2175 | TIP462 | 12.6268 |
| 463 | 20.3209 | TIP463 | 15.1283 |
| 464 | 20.1588 | TIP464 | 14.7348 |
| 465 | 20.1305 | TIP465 | 13.2632 |
| 466 | 20.2618 | TIP466 | 15.2935 |
| 467 | 20.2456 | TIP467 | 13.3884 |
| 468 | 20.4926 | TIP468 | 14.2758 |
| 469 | 20.4283 | TIP469 | 16.1224 |
| 470 | 20.5854 | TIP470 | 15.1497 |
| 471 | 20.4948 | TIP471 | 15.5021 |
| 472 | 20.4816 | TIP472 | 13.3633 |
| 473 | 20.3253 | TIP473 | 15.1761 |
| 474 | 20.3077 | TIP474 | 15.2833 |
| 475 | 20.1531 | TIP475 | 13.2924 |
| 476 | 20.2152 | TIP476 | 14.9527 |
| 477 | 20.2537 | TIP477 | 15.651  |
| 478 | 20.2446 | TIP478 | 14.3418 |
| 479 | 20.3337 | TIP479 | 15.2908 |
| 480 | 20.0043 | TIP480 | 13.1264 |
| 481 | 20.1105 | TIP481 | 15.2545 |
| 482 | 19.8477 | TIP482 | 13.5948 |
| 483 | 19.7178 | TIP483 | 13.4527 |
| 484 | 19.6894 | TIP484 | 15.0148 |
| 485 | 19.7311 | TIP485 | 12.0303 |
| 486 | 19.8522 | TIP486 | 15.256  |
| 487 | 20.1315 | TIP487 | 15.4293 |
| 488 | 20.3757 | TIP488 | 14.0535 |
| 489 | 20.2809 | TIP489 | 14.5012 |
| 490 | 20.019  | TIP490 | 13.377  |
| 491 | 19.9306 | TIP491 | 12.6703 |
| 492 | 19.8978 | TIP492 | 14.4357 |
| 493 | 19.9549 | TIP493 | 14.0778 |

|     |         |        |         |
|-----|---------|--------|---------|
| 494 | 20.1203 | TIP494 | 13.2095 |
| 495 | 20.0828 | TIP495 | 14.2761 |
| 496 | 19.9361 | TIP496 | 15.4038 |
| 497 | 20.0583 | TIP497 | 13.636  |
| 498 | 19.8162 | TIP498 | 13.4244 |
| 499 | 19.8931 | TIP499 | 14.6025 |
| 500 | 20.0676 | TIP500 | 14.3467 |
| 501 | 19.917  | TIP501 | 14.2215 |
| 502 | 19.853  | TIP502 | 13.1379 |
| 503 | 19.7615 | TIP503 | 14.0384 |
| 504 | 19.6872 | TIP504 | 14.0544 |
| 505 | 19.7514 | TIP505 | 15.0901 |
| 506 | 19.6597 | TIP506 | 15.0464 |
| 507 | 19.8075 | TIP507 | 15.307  |
| 508 | 19.8956 | TIP508 | 12.5604 |
| 509 | 19.8733 | TIP509 | 14.5835 |
| 510 | 19.7842 | TIP510 | 14.0066 |
| 511 | 19.9204 | TIP511 | 13.3137 |
| 512 | 19.854  | TIP512 | 12.9905 |
| 513 | 19.9395 | TIP513 | 14.6994 |
| 514 | 19.8835 | TIP514 | 12.6687 |
| 515 | 20.0381 | TIP515 | 13.546  |
| 516 | 20.1773 | TIP516 | 14.0253 |
| 517 | 20.2078 | TIP517 | 12.282  |
| 518 | 20.3006 | TIP518 | 14.0216 |
| 519 | 20.1232 | TIP519 | 13.3834 |
| 520 | 20.1572 | TIP520 | 15.3675 |
| 521 | 20.08   | TIP521 | 13.2237 |
| 522 | 20.22   | TIP522 | 13.0274 |
| 523 | 20.3078 | TIP523 | 12.4553 |
| 524 | 20.1634 | TIP524 | 14.7069 |
| 525 | 20.2193 | TIP525 | 15.0859 |
| 526 | 20.2514 | TIP526 | 14.4889 |
| 527 | 20.254  | TIP527 | 14.8569 |
| 528 | 20.3367 | TIP528 | 14.3373 |
| 529 | 20.4569 | TIP529 | 15.2308 |
| 530 | 20.4226 | TIP530 | 12.0712 |
| 531 | 20.2802 | TIP531 | 15.1906 |
| 532 | 19.9569 | TIP532 | 14.7346 |
| 533 | 20.1211 | TIP533 | 14.9149 |
| 534 | 20.1279 | TIP534 | 13.457  |
| 535 | 20.1546 | TIP535 | 13.9956 |
| 536 | 20.303  | TIP536 | 15.7148 |
| 537 | 20.2731 | TIP537 | 12.7115 |
| 538 | 20.4392 | TIP538 | 13.4079 |

|     |         |        |         |
|-----|---------|--------|---------|
| 539 | 20.5206 | TIP539 | 13.2946 |
| 540 | 20.5179 | TIP540 | 13.248  |
| 541 | 20.1389 | TIP541 | 13.8185 |
| 542 | 20.1812 | TIP542 | 14.3417 |
| 543 | 20.3354 | TIP543 | 13.5594 |
| 544 | 20.1625 | TIP544 | 14.3203 |
| 545 | 20.0608 | TIP545 | 14.3788 |
| 546 | 20.2081 | TIP546 | 13.9869 |
| 547 | 20.2517 | SOD547 | 17.26   |
| 548 | 20.3832 | CLA548 | 16.3844 |
| 549 | 20.2052 |        |         |
| 550 | 20.2114 |        |         |
| 551 | 20.1342 |        |         |
| 552 | 20.2312 |        |         |
| 553 | 20.2431 |        |         |
| 554 | 20.3213 |        |         |
| 555 | 20.3001 |        |         |
| 556 | 20.2822 |        |         |
| 557 | 20.3485 |        |         |
| 558 | 20.4205 |        |         |
| 559 | 20.3854 |        |         |
| 560 | 20.6059 |        |         |
| 561 | 20.2229 |        |         |
| 562 | 20.2574 |        |         |
| 563 | 20.2556 |        |         |
| 564 | 19.9944 |        |         |
| 565 | 19.8889 |        |         |
| 566 | 20.1111 |        |         |
| 567 | 19.9597 |        |         |
| 568 | 20.4916 |        |         |
| 569 | 20.0832 |        |         |
| 570 | 19.9332 |        |         |
| 571 | 19.8088 |        |         |
| 572 | 20.2511 |        |         |
| 573 | 20.4494 |        |         |
| 574 | 20.0374 |        |         |
| 575 | 20.2198 |        |         |
| 576 | 20.301  |        |         |
| 577 | 20.1492 |        |         |
| 578 | 19.9836 |        |         |
| 579 | 20.6686 |        |         |
| 580 | 20.2862 |        |         |
| 581 | 20.3668 |        |         |
| 582 | 20.2489 |        |         |
| 583 | 20.5191 |        |         |

|     |         |
|-----|---------|
| 584 | 20.3685 |
| 585 | 20.3568 |
| 586 | 20.7487 |
| 587 | 20.7273 |
| 588 | 20.6154 |
| 589 | 20.5784 |
| 590 | 20.7296 |
| 591 | 20.4438 |
| 592 | 20.1411 |
| 593 | 20.3737 |
| 594 | 20.3226 |
| 595 | 20.2372 |
| 596 | 20.1364 |
| 597 | 20.1075 |
| 598 | 20.2612 |
| 599 | 20.1573 |
| 600 | 20.3158 |
| 601 | 19.5669 |
| 602 | 19.462  |
| 603 | 19.4734 |
| 604 | 19.3882 |
| 605 | 19.5433 |
| 606 | 19.2381 |
| 607 | 19.473  |
| 608 | 19.2472 |
| 609 | 19.2752 |
| 610 | 19.5916 |
| 611 | 19.6681 |
| 612 | 19.6014 |
| 613 | 19.4575 |
| 614 | 19.3553 |
| 615 | 19.4392 |
| 616 | 19.4121 |
| 617 | 19.4705 |
| 618 | 19.3864 |
| 619 | 19.301  |
| 620 | 19.6137 |
| 621 | 19.303  |
| 622 | 19.6805 |
| 623 | 19.6083 |
| 624 | 19.4943 |
| 625 | 19.2352 |
| 626 | 19.3755 |
| 627 | 19.2295 |
| 628 | 19.1513 |

|     |         |
|-----|---------|
| 629 | 19.1475 |
| 630 | 19.2189 |
| 631 | 19.4614 |
| 632 | 19.6724 |
| 633 | 19.6121 |
| 634 | 19.9474 |
| 635 | 19.8947 |
| 636 | 19.6893 |
| 637 | 19.559  |
| 638 | 19.6321 |
| 639 | 19.5713 |
| 640 | 19.4554 |
| 641 | 19.5807 |
| 642 | 19.694  |
| 643 | 19.6719 |
| 644 | 19.5914 |
| 645 | 19.4396 |
| 646 | 19.2125 |
| 647 | 19.312  |
| 648 | 19.1859 |
| 649 | 19.1986 |
| 650 | 19.2367 |
| 651 | 19.5257 |
| 652 | 19.4348 |
| 653 | 19.4641 |
| 654 | 19.5578 |
| 655 | 19.4215 |
| 656 | 19.6245 |
| 657 | 19.628  |
| 658 | 19.6495 |
| 659 | 19.5264 |
| 660 | 19.5729 |
| 661 | 19.5407 |
| 662 | 19.6046 |
| 663 | 19.2773 |
| 664 | 19.8546 |
| 665 | 19.614  |
| 666 | 19.6069 |
| 667 | 19.7118 |
| 668 | 19.51   |
| 669 | 19.5222 |
| 670 | 19.2903 |
| 671 | 19.0761 |
| 672 | 19.1772 |
| 673 | 19.475  |

|     |         |
|-----|---------|
| 674 | 19.5585 |
| 675 | 19.5546 |
| 676 | 19.7616 |
| 677 | 19.7974 |
| 678 | 20.1194 |
| 679 | 20.0625 |
| 680 | 19.8461 |
| 681 | 19.9482 |
| 682 | 20.0227 |
| 683 | 19.969  |
| 684 | 20.2084 |
| 685 | 19.7627 |
| 686 | 20.0273 |
| 687 | 19.9573 |
| 688 | 19.8862 |
| 689 | 20.0159 |
| 690 | 20.006  |
| 691 | 20.0241 |
| 692 | 19.7582 |
| 693 | 20.1248 |
| 694 | 19.9252 |
| 695 | 19.6056 |
| 696 | 19.473  |
| 697 | 19.5733 |
| 698 | 19.4777 |
| 699 | 19.5034 |
| 700 | 19.5179 |
| 701 | 19.6876 |
| 702 | 19.7586 |
| 703 | 19.7642 |
| 704 | 19.7842 |
| 705 | 19.4693 |
| 706 | 19.5516 |
| 707 | 19.5134 |
| 708 | 19.3518 |
| 709 | 19.3083 |
| 710 | 19.286  |
| 711 | 19.6515 |
| 712 | 19.6284 |
| 713 | 19.6806 |
| 714 | 19.63   |
| 715 | 19.8505 |
| 716 | 19.4878 |
| 717 | 19.5095 |
| 718 | 19.5172 |



|     |         |
|-----|---------|
| 719 | 19.8031 |
| 720 | 19.5505 |
| 721 | 19.5119 |
| 722 | 19.4186 |
| 723 | 19.6735 |
| 724 | 19.6156 |
| 725 | 19.5759 |
| 726 | 19.5037 |
| 727 | 19.5381 |
| 728 | 19.3047 |
| 729 | 19.3386 |
| 730 | 19.539  |
| 731 | 19.3389 |
| 732 | 19.5464 |
| 733 | 19.4168 |
| 734 | 19.5489 |
| 735 | 19.6523 |
| 736 | 19.5874 |
| 737 | 19.6832 |
| 738 | 19.423  |
| 739 | 19.2859 |
| 740 | 19.2137 |
| 741 | 19.2606 |
| 742 | 19.1366 |
| 743 | 19.4968 |
| 744 | 19.6563 |
| 745 | 19.4035 |
| 746 | 19.6003 |
| 747 | 19.3656 |
| 748 | 19.3625 |
| 749 | 19.8151 |
| 750 | 19.5514 |
| 751 | 19.5255 |
| 752 | 19.7843 |
| 753 | 19.7229 |
| 754 | 19.391  |
| 755 | 19.7136 |
| 756 | 19.8505 |
| 757 | 19.6002 |
| 758 | 19.7151 |
| 759 | 19.7044 |
| 760 | 19.6191 |
| 761 | 19.7327 |
| 762 | 19.7948 |
| 763 | 19.8835 |

|     |         |
|-----|---------|
| 764 | 19.6843 |
| 765 | 19.8827 |
| 766 | 19.928  |
| 767 | 19.8377 |
| 768 | 19.7932 |
| 769 | 19.7207 |
| 770 | 19.8096 |
| 771 | 19.519  |
| 772 | 19.382  |
| 773 | 19.4294 |
| 774 | 19.6442 |
| 775 | 19.541  |
| 776 | 19.4709 |
| 777 | 19.3137 |
| 778 | 19.2278 |
| 779 | 19.1626 |
| 780 | 19.6406 |
| 781 | 19.6252 |
| 782 | 19.5449 |
| 783 | 19.4723 |
| 784 | 19.8356 |
| 785 | 19.8396 |
| 786 | 19.842  |
| 787 | 19.6668 |
| 788 | 19.6762 |
| 789 | 19.9544 |
| 790 | 20.2645 |
| 791 | 20.2458 |
| 792 | 20.2076 |
| 793 | 20.1732 |
| 794 | 20.0024 |
| 795 | 19.7648 |
| 796 | 19.6688 |
| 797 | 19.8281 |
| 798 | 19.9234 |
| 799 | 19.7728 |
| 800 | 19.9991 |
| 801 | 20.0412 |
| 802 | 19.8471 |
| 803 | 19.9903 |
| 804 | 19.9538 |
| 805 | 19.8477 |
| 806 | 19.8796 |
| 807 | 19.9909 |
| 808 | 19.813  |

|     |         |
|-----|---------|
| 809 | 19.8986 |
| 810 | 19.8708 |
| 811 | 19.8023 |
| 812 | 19.572  |
| 813 | 19.5129 |
| 814 | 19.2947 |
| 815 | 19.0528 |
| 816 | 19.1188 |
| 817 | 19.4489 |
| 818 | 19.3534 |
| 819 | 19.5111 |
| 820 | 19.5683 |
| 821 | 19.6496 |
| 822 | 19.6678 |
| 823 | 19.4526 |
| 824 | 19.3227 |
| 825 | 19.3302 |
| 826 | 19.5602 |
| 827 | 19.6984 |
| 828 | 19.7662 |
| 829 | 19.8716 |
| 830 | 19.8233 |
| 831 | 19.6291 |
| 832 | 19.6373 |
| 833 | 19.6153 |
| 834 | 19.786  |
| 835 | 19.7025 |
| 836 | 19.6258 |
| 837 | 19.4758 |
| 838 | 19.4128 |
| 839 | 19.2899 |
| 840 | 19.4718 |
| 841 | 19.5016 |
| 842 | 19.3193 |
| 843 | 19.3988 |
| 844 | 19.367  |
| 845 | 19.6733 |
| 846 | 19.2806 |
| 847 | 19.3301 |
| 848 | 19.3681 |
| 849 | 19.4741 |
| 850 | 19.6129 |
| 851 | 19.576  |
| 852 | 19.6579 |
| 853 | 19.5045 |

|     |         |
|-----|---------|
| 854 | 19.4305 |
| 855 | 19.5302 |
| 856 | 19.9092 |
| 857 | 19.749  |
| 858 | 19.9949 |
| 859 | 19.8147 |
| 860 | 19.6063 |
| 861 | 19.372  |
| 862 | 19.4447 |
| 863 | 19.3036 |
| 864 | 19.438  |
| 865 | 19.6197 |
| 866 | 19.1952 |
| 867 | 19.5165 |
| 868 | 19.5197 |
| 869 | 19.4079 |
| 870 | 19.3842 |
| 871 | 19.6167 |
| 872 | 19.6748 |
| 873 | 19.3922 |
| 874 | 19.4443 |
| 875 | 19.2717 |
| 876 | 19.3575 |
| 877 | 19.4834 |
| 878 | 19.5242 |
| 879 | 19.3587 |
| 880 | 19.3054 |
| 881 | 19.22   |
| 882 | 19.1625 |
| 883 | 19.4321 |
| 884 | 19.2165 |
| 885 | 19.4742 |
| 886 | 19.7287 |
| 887 | 19.4138 |
| 888 | 19.5623 |
| 889 | 19.8094 |
| 890 | 19.6648 |
| 891 | 19.6912 |
| 892 | 19.8407 |
| 893 | 19.9934 |
| 894 | 19.9863 |
| 895 | 19.7207 |
| 896 | 19.708  |
| 897 | 19.7745 |
| 898 | 19.2819 |

|     |         |
|-----|---------|
| 899 | 19.3156 |
| 900 | 19.4981 |
| 901 | 19.6009 |
| 902 | 19.4967 |
| 903 | 19.3335 |
| 904 | 19.1802 |
| 905 | 19.1585 |
| 906 | 19.1523 |
| 907 | 19.1485 |
| 908 | 19.2356 |
| 909 | 19.3494 |
| 910 | 19.4867 |
| 911 | 19.5522 |
| 912 | 19.4139 |
| 913 | 19.5948 |
| 914 | 19.3593 |
| 915 | 19.3981 |
| 916 | 19.3402 |
| 917 | 19.2235 |
| 918 | 19.3344 |
| 919 | 19.2541 |
| 920 | 19.5165 |
| 921 | 19.3814 |
| 922 | 19.5487 |
| 923 | 19.5204 |
| 924 | 19.66   |
| 925 | 19.7051 |
| 926 | 19.6557 |
| 927 | 19.49   |
| 928 | 19.5193 |
| 929 | 19.3913 |
| 930 | 19.7737 |
| 931 | 19.7708 |
| 932 | 19.7459 |
| 933 | 19.7323 |
| 934 | 19.8502 |
| 935 | 19.7173 |
| 936 | 19.6523 |
| 937 | 19.8096 |
| 938 | 19.9598 |
| 939 | 19.8143 |
| 940 | 19.9558 |
| 941 | 19.4825 |
| 942 | 19.8156 |
| 943 | 19.8991 |

|     |         |
|-----|---------|
| 944 | 19.8335 |
| 945 | 19.9357 |
| 946 | 19.9339 |
| 947 | 19.6475 |
| 948 | 19.6549 |
| 949 | 19.4318 |
| 950 | 19.5983 |
| 951 | 19.8652 |
| 952 | 19.7332 |
| 953 | 19.6326 |
| 954 | 19.6736 |
| 955 | 19.644  |
| 956 | 19.6726 |
| 957 | 19.8415 |
| 958 | 19.5021 |
| 959 | 19.6229 |
| 960 | 19.3939 |
| 961 | 19.1861 |
| 962 | 19.4247 |
| 963 | 19.4944 |
| 964 | 19.6574 |
| 965 | 19.7849 |
| 966 | 19.5841 |
| 967 | 19.7067 |
| 968 | 19.5478 |
| 969 | 19.3783 |
| 970 | 19.4765 |
| 971 | 19.5589 |
| 972 | 19.684  |
| 973 | 19.6393 |
| 974 | 19.5545 |
| 975 | 19.6546 |
| 976 | 19.6325 |
| 977 | 19.8259 |
| 978 | 19.6561 |
| 979 | 19.7172 |
| 980 | 19.6573 |
| 981 | 19.5935 |
| 982 | 19.6942 |
| 983 | 19.5504 |
| 984 | 19.4277 |
| 985 | 19.5282 |
| 986 | 19.588  |
| 987 | 19.4524 |
| 988 | 19.6031 |

|       |         |
|-------|---------|
| 989   | 19.612  |
| 990   | 19.5655 |
| 991   | 19.6237 |
| 992   | 19.6657 |
| 993   | 19.598  |
| 994   | 19.2937 |
| 995   | 19.6918 |
| 996   | 19.5369 |
| 997   | 19.6348 |
| 998   | 19.6284 |
| 999   | 19.7741 |
| 1,000 | 19.5731 |
| 1,001 | 19.4505 |
| 1,002 | 19.6219 |
| 1,003 | 19.8556 |
| 1,004 | 19.8715 |
| 1,005 | 19.873  |
| 1,006 | 19.6236 |
| 1,007 | 20.0447 |
| 1,008 | 20.2905 |
| 1,009 | 20.3199 |
| 1,010 | 20.3179 |
| 1,011 | 20.0769 |
| 1,012 | 19.8985 |
| 1,013 | 19.8433 |
| 1,014 | 19.86   |
| 1,015 | 19.9106 |
| 1,016 | 19.7975 |
| 1,017 | 19.6633 |
| 1,018 | 19.524  |
| 1,019 | 19.6234 |
| 1,020 | 19.8204 |
| 1,021 | 19.671  |
| 1,022 | 19.9013 |
| 1,023 | 19.724  |
| 1,024 | 19.7278 |
| 1,025 | 19.4245 |
| 1,026 | 19.8804 |
| 1,027 | 19.7194 |
| 1,028 | 19.8385 |
| 1,029 | 19.8644 |
| 1,030 | 19.7283 |
| 1,031 | 19.718  |
| 1,032 | 19.7757 |
| 1,033 | 19.7305 |

|       |         |
|-------|---------|
| 1,034 | 19.8265 |
| 1,035 | 19.8004 |
| 1,036 | 19.7572 |
| 1,037 | 19.6944 |
| 1,038 | 19.7167 |
| 1,039 | 19.8273 |
| 1,040 | 19.8563 |
| 1,041 | 19.9534 |
| 1,042 | 20.0109 |
| 1,043 | 19.8091 |
| 1,044 | 20.0258 |
| 1,045 | 20.0818 |
| 1,046 | 20.2486 |
| 1,047 | 20.1833 |
| 1,048 | 20.0808 |
| 1,049 | 20.0551 |
| 1,050 | 19.8513 |
| 1,051 | 20.2136 |
| 1,052 | 19.7435 |
| 1,053 | 20.1682 |
| 1,054 | 19.7784 |
| 1,055 | 19.7487 |
| 1,056 | 19.6495 |
| 1,057 | 19.6729 |
| 1,058 | 19.904  |
| 1,059 | 19.5364 |
| 1,060 | 19.5697 |
| 1,061 | 19.5465 |
| 1,062 | 19.5797 |
| 1,063 | 19.623  |
| 1,064 | 19.7509 |
| 1,065 | 19.9115 |
| 1,066 | 19.8486 |
| 1,067 | 19.9075 |
| 1,068 | 20.0518 |
| 1,069 | 20.1719 |
| 1,070 | 20.0522 |
| 1,071 | 19.7898 |
| 1,072 | 19.8017 |
| 1,073 | 19.6187 |
| 1,074 | 19.7097 |
| 1,075 | 19.9612 |
| 1,076 | 19.7158 |
| 1,077 | 19.8839 |
| 1,078 | 19.8693 |



|       |         |
|-------|---------|
| 1,079 | 20.0013 |
| 1,080 | 19.8582 |
| 1,081 | 19.7113 |
| 1,082 | 19.806  |
| 1,083 | 19.8629 |
| 1,084 | 19.7536 |
| 1,085 | 19.7351 |
| 1,086 | 19.9048 |
| 1,087 | 19.9691 |
| 1,088 | 19.6628 |
| 1,089 | 19.6058 |
| 1,090 | 19.7547 |
| 1,091 | 19.6029 |
| 1,092 | 19.554  |
| 1,093 | 19.3447 |
| 1,094 | 19.5019 |
| 1,095 | 19.5741 |
| 1,096 | 19.7824 |
| 1,097 | 19.7276 |
| 1,098 | 19.8822 |
| 1,099 | 19.7527 |
| 1,100 | 19.7027 |

**Table S3** .RMSD and RMSF values of RMSD-S2- Meldonium.

| Index | RMSD-S2- Meldonium | Residue | RMSF-S2- Meldonium |
|-------|--------------------|---------|--------------------|
| 1     | 0                  | UNK0    | 15.8992            |
| 2     | 9.95561            | TIP2    | 16.0811            |
| 3     | 11.2299            | TIP3    | 15.5666            |
| 4     | 12.4003            | TIP4    | 13.1487            |
| 5     | 13.5931            | TIP5    | 13.1889            |
| 6     | 14.2903            | TIP6    | 14.6278            |
| 7     | 14.517             | TIP7    | 17.3006            |
| 8     | 14.8023            | TIP8    | 11.8881            |
| 9     | 15.3535            | TIP9    | 15.0067            |
| 10    | 14.9493            | TIP10   | 14.3845            |
| 11    | 15.1873            | TIP11   | 15.3507            |
| 12    | 15.689             | TIP12   | 16.3096            |
| 13    | 16.2946            | TIP13   | 12.2513            |
| 14    | 16.3388            | TIP14   | 16.2259            |
| 15    | 16.5362            | TIP15   | 16.2384            |
| 16    | 16.7176            | TIP16   | 15.2526            |

|    |         |       |         |
|----|---------|-------|---------|
| 17 | 17.5262 | TIP17 | 16.0885 |
| 18 | 17.4843 | TIP18 | 13.1425 |
| 19 | 17.8064 | TIP19 | 14.1096 |
| 20 | 17.6094 | TIP20 | 12.8108 |
| 21 | 17.8725 | TIP21 | 15.4912 |
| 22 | 17.9255 | TIP22 | 17.016  |
| 23 | 17.8612 | TIP23 | 12.0223 |
| 24 | 18.0676 | TIP24 | 14.4226 |
| 25 | 18.1408 | TIP25 | 15.547  |
| 26 | 18.5741 | TIP26 | 16.14   |
| 27 | 18.5797 | TIP27 | 15.3168 |
| 28 | 18.6685 | TIP28 | 17.1917 |
| 29 | 18.7234 | TIP29 | 16.4661 |
| 30 | 18.7501 | TIP30 | 14.4174 |
| 31 | 18.6966 | TIP31 | 13.359  |
| 32 | 18.729  | TIP32 | 13.2808 |
| 33 | 18.7205 | TIP33 | 15.6001 |
| 34 | 18.8723 | TIP34 | 16.9239 |
| 35 | 18.9011 | TIP35 | 15.4399 |
| 36 | 18.8784 | TIP36 | 13.4797 |
| 37 | 18.8473 | TIP37 | 12.0021 |
| 38 | 18.6775 | TIP38 | 15.7873 |
| 39 | 19.0568 | TIP39 | 15.2771 |
| 40 | 19.3562 | TIP40 | 17.0691 |
| 41 | 19.1968 | TIP41 | 16.5246 |
| 42 | 19.4636 | TIP42 | 12.3071 |
| 43 | 19.3219 | TIP43 | 12.9143 |
| 44 | 19.2786 | TIP44 | 14.4935 |
| 45 | 19.4074 | TIP45 | 13.067  |
| 46 | 19.7649 | TIP46 | 15.8018 |
| 47 | 19.5336 | TIP47 | 16.5226 |
| 48 | 19.3573 | TIP48 | 13.9314 |
| 49 | 19.5922 | TIP49 | 14.01   |
| 50 | 19.5498 | TIP50 | 11.4703 |
| 51 | 19.8178 | TIP51 | 14.7351 |
| 52 | 19.9417 | TIP52 | 13.0386 |
| 53 | 19.8341 | TIP53 | 13.3686 |
| 54 | 19.8759 | TIP54 | 16.9891 |
| 55 | 19.9626 | TIP55 | 15.3266 |
| 56 | 20.0205 | TIP56 | 15.7469 |
| 57 | 20.2482 | TIP57 | 16.7853 |
| 58 | 20.3007 | TIP58 | 15.9291 |
| 59 | 20.45   | TIP59 | 13.8149 |
| 60 | 20.5623 | TIP60 | 14.5463 |
| 61 | 20.3921 | TIP61 | 16.2356 |

|     |         |        |         |
|-----|---------|--------|---------|
| 62  | 20.6202 | TIP62  | 13.2928 |
| 63  | 20.2088 | TIP63  | 14.2826 |
| 64  | 20.2612 | TIP64  | 14.0958 |
| 65  | 20.4504 | TIP65  | 17.1851 |
| 66  | 20.5184 | TIP66  | 13.1412 |
| 67  | 20.2101 | TIP67  | 13.8984 |
| 68  | 19.9799 | TIP68  | 14.7979 |
| 69  | 20.0356 | TIP69  | 16.5775 |
| 70  | 20.2014 | TIP70  | 14.2713 |
| 71  | 20.3101 | TIP71  | 13.299  |
| 72  | 20.4612 | TIP72  | 15.5702 |
| 73  | 20.4905 | TIP73  | 14.8448 |
| 74  | 20.5059 | TIP74  | 14.1096 |
| 75  | 20.8625 | TIP75  | 13.409  |
| 76  | 20.9872 | TIP76  | 17.397  |
| 77  | 20.8908 | TIP77  | 13.2979 |
| 78  | 20.702  | TIP78  | 16.27   |
| 79  | 20.5486 | TIP79  | 16.3626 |
| 80  | 20.8246 | TIP80  | 16.8541 |
| 81  | 20.8153 | TIP81  | 15.8806 |
| 82  | 20.9283 | TIP82  | 14.3104 |
| 83  | 21.0627 | TIP83  | 16.5627 |
| 84  | 20.9012 | TIP84  | 15.3847 |
| 85  | 20.8221 | TIP85  | 15.2237 |
| 86  | 20.782  | TIP86  | 15.8001 |
| 87  | 21.0447 | TIP87  | 15.8644 |
| 88  | 21.0384 | TIP88  | 15.9306 |
| 89  | 21.0361 | TIP89  | 15.582  |
| 90  | 21.1855 | TIP90  | 14.1207 |
| 91  | 20.9174 | TIP91  | 15.4402 |
| 92  | 21.1253 | TIP92  | 15.3507 |
| 93  | 21.0802 | TIP93  | 14.8999 |
| 94  | 20.8976 | TIP94  | 11.6727 |
| 95  | 20.9183 | TIP95  | 13.9577 |
| 96  | 20.8372 | TIP96  | 14.0087 |
| 97  | 20.6156 | TIP97  | 16.0425 |
| 98  | 20.7999 | TIP98  | 12.4694 |
| 99  | 21.161  | TIP99  | 14.629  |
| 100 | 21.1096 | TIP100 | 15.0214 |
| 101 | 21.1548 | TIP101 | 15.4102 |
| 102 | 20.9852 | TIP102 | 15.6999 |
| 103 | 21.162  | TIP103 | 16.9994 |
| 104 | 20.8773 | TIP104 | 15.52   |
| 105 | 21.0333 | TIP105 | 16.1707 |
| 106 | 20.881  | TIP106 | 16.5456 |

|     |         |        |         |
|-----|---------|--------|---------|
| 107 | 21.0784 | TIP107 | 17.0866 |
| 108 | 21.0234 | TIP108 | 14.9119 |
| 109 | 21.0201 | TIP109 | 14.4812 |
| 110 | 20.7806 | TIP110 | 14.9249 |
| 111 | 20.8575 | TIP111 | 14.8821 |
| 112 | 20.838  | TIP112 | 14.4992 |
| 113 | 20.7811 | TIP113 | 17.0015 |
| 114 | 20.7946 | TIP114 | 13.4297 |
| 115 | 20.9528 | TIP115 | 15.621  |
| 116 | 21.0002 | TIP116 | 14.3757 |
| 117 | 20.6914 | TIP117 | 16.468  |
| 118 | 20.8041 | TIP118 | 14.7809 |
| 119 | 20.9072 | TIP119 | 15.1597 |
| 120 | 21.1937 | TIP120 | 12.7144 |
| 121 | 21.0573 | TIP121 | 15.6594 |
| 122 | 20.8671 | TIP122 | 14.5278 |
| 123 | 20.8548 | TIP123 | 13.7354 |
| 124 | 20.7424 | TIP124 | 15.8378 |
| 125 | 20.7972 | TIP125 | 14.7077 |
| 126 | 21.223  | TIP126 | 14.9117 |
| 127 | 21.3001 | TIP127 | 14.9396 |
| 128 | 21.1885 | TIP128 | 13.6568 |
| 129 | 21.0893 | TIP129 | 14.7264 |
| 130 | 21.0702 | TIP130 | 13.5364 |
| 131 | 20.9943 | TIP131 | 12.6901 |
| 132 | 21.0669 | TIP132 | 13.9649 |
| 133 | 20.7275 | TIP133 | 14.8047 |
| 134 | 20.8764 | TIP134 | 15.6743 |
| 135 | 20.9091 | TIP135 | 15.8994 |
| 136 | 21.0178 | TIP136 | 17.683  |
| 137 | 21.0366 | TIP137 | 15.6046 |
| 138 | 21.075  | TIP138 | 13.8108 |
| 139 | 20.956  | TIP139 | 16.1247 |
| 140 | 21.1714 | TIP140 | 16.7839 |
| 141 | 21.4557 | TIP141 | 17.1401 |
| 142 | 21.3018 | TIP142 | 13.7362 |
| 143 | 21.3157 | TIP143 | 13.4305 |
| 144 | 21.3363 | TIP144 | 14.8361 |
| 145 | 21.3868 | TIP145 | 15.1745 |
| 146 | 21.3103 | TIP146 | 15.2044 |
| 147 | 21.509  | TIP147 | 15.0051 |
| 148 | 21.2141 | TIP148 | 14.862  |
| 149 | 21.086  | TIP149 | 13.1664 |
| 150 | 21.2045 | TIP150 | 13.4666 |
| 151 | 21.0657 | TIP151 | 13.6786 |

|     |         |        |         |
|-----|---------|--------|---------|
| 152 | 21.4485 | TIP152 | 13.6018 |
| 153 | 21.4204 | TIP153 | 14.6283 |
| 154 | 21.5036 | TIP154 | 14.5131 |
| 155 | 21.429  | TIP155 | 16.2387 |
| 156 | 21.3515 | TIP156 | 18.4744 |
| 157 | 21.4843 | TIP157 | 16.0464 |
| 158 | 21.2479 | TIP158 | 15.366  |
| 159 | 21.0876 | TIP159 | 13.021  |
| 160 | 21.2054 | TIP160 | 13.3976 |
| 161 | 21.2308 | TIP161 | 15.4893 |
| 162 | 21.3357 | TIP162 | 15.7466 |
| 163 | 21.3039 | TIP163 | 16.2927 |
| 164 | 21.5094 | TIP164 | 15.9958 |
| 165 | 21.4288 | TIP165 | 15.4866 |
| 166 | 21.4167 | TIP166 | 13.5166 |
| 167 | 21.4338 | TIP167 | 16.3097 |
| 168 | 21.6625 | TIP168 | 14.8533 |
| 169 | 21.2854 | TIP169 | 16.4905 |
| 170 | 21.4291 | TIP170 | 15.1606 |
| 171 | 21.1987 | TIP171 | 12.2486 |
| 172 | 21.1931 | TIP172 | 16.1977 |
| 173 | 21.0786 | TIP173 | 15.9478 |
| 174 | 21.2234 | TIP174 | 13.6526 |
| 175 | 21.2353 | TIP175 | 14.4726 |
| 176 | 21.2436 | TIP176 | 14.8648 |
| 177 | 21.3413 | TIP177 | 15.0223 |
| 178 | 21.2183 | TIP178 | 12.8169 |
| 179 | 21.1491 | TIP179 | 14.5553 |
| 180 | 21.4319 | TIP180 | 11.8865 |
| 181 | 21.1971 | TIP181 | 14.6599 |
| 182 | 21.2679 | TIP182 | 15.7328 |
| 183 | 20.9436 | TIP183 | 15.4066 |
| 184 | 21.0992 | TIP184 | 18.1658 |
| 185 | 21.1319 | TIP185 | 14.3435 |
| 186 | 21.087  | TIP186 | 16.112  |
| 187 | 21.0382 | TIP187 | 15.3797 |
| 188 | 21.1037 | TIP188 | 15.3371 |
| 189 | 21.2163 | TIP189 | 13.4638 |
| 190 | 20.9122 | TIP190 | 16.4151 |
| 191 | 21.0158 | TIP191 | 14.4081 |
| 192 | 21.2242 | TIP192 | 15.1966 |
| 193 | 21.1968 | TIP193 | 14.8222 |
| 194 | 21.0166 | TIP194 | 12.2877 |
| 195 | 21.1607 | TIP195 | 14.1569 |
| 196 | 21.0725 | TIP196 | 15.4022 |

|     |         |        |         |
|-----|---------|--------|---------|
| 197 | 21.1805 | TIP197 | 15.564  |
| 198 | 21.472  | TIP198 | 14.5954 |
| 199 | 21.3137 | TIP199 | 14.1467 |
| 200 | 20.9412 | TIP200 | 14.782  |
| 201 | 21.2911 | TIP201 | 13.2962 |
| 202 | 21.1349 | TIP202 | 15.737  |
| 203 | 20.9735 | TIP203 | 13.4497 |
| 204 | 20.5965 | TIP204 | 14.4801 |
| 205 | 20.9142 | TIP205 | 13.0014 |
| 206 | 20.8462 | TIP206 | 13.6763 |
| 207 | 21.0326 | TIP207 | 12.7468 |
| 208 | 21.0683 | TIP208 | 14.906  |
| 209 | 20.9194 | TIP209 | 14.8029 |
| 210 | 20.9036 | TIP210 | 16.1837 |
| 211 | 21.0983 | TIP211 | 14.1496 |
| 212 | 21.2478 | TIP212 | 14.0057 |
| 213 | 21.3217 | TIP213 | 14.2861 |
| 214 | 21.099  | TIP214 | 15.3296 |
| 215 | 21.0614 | TIP215 | 13.734  |
| 216 | 21.2096 | TIP216 | 15.4734 |
| 217 | 21.1264 | TIP217 | 12.9025 |
| 218 | 20.9954 | TIP218 | 15.041  |
| 219 | 21.0911 | TIP219 | 12.5596 |
| 220 | 21.0051 | TIP220 | 13.8363 |
| 221 | 21.245  | TIP221 | 16.1412 |
| 222 | 21.1844 | TIP222 | 12.8545 |
| 223 | 21.3804 | TIP223 | 16.8991 |
| 224 | 21.4843 | TIP224 | 15.7301 |
| 225 | 21.3817 | TIP225 | 15.2924 |
| 226 | 21.2684 | TIP226 | 15.5909 |
| 227 | 21.2464 | TIP227 | 14.8734 |
| 228 | 20.9936 | TIP228 | 17.2292 |
| 229 | 21.1352 | TIP229 | 13.9002 |
| 230 | 20.9145 | TIP230 | 15.6196 |
| 231 | 20.7003 | TIP231 | 15.1555 |
| 232 | 21.0882 | TIP232 | 15.608  |
| 233 | 20.8306 | TIP233 | 13.6237 |
| 234 | 20.8879 | TIP234 | 15.1502 |
| 235 | 20.8794 | TIP235 | 14.1618 |
| 236 | 20.7995 | TIP236 | 14.8058 |
| 237 | 20.9854 | TIP237 | 13.3284 |
| 238 | 20.8671 | TIP238 | 16.0926 |
| 239 | 20.8484 | TIP239 | 16.3341 |
| 240 | 20.9743 | TIP240 | 15.5726 |
| 241 | 21.0506 | TIP241 | 13.8861 |

|     |         |        |         |
|-----|---------|--------|---------|
| 242 | 20.9337 | TIP242 | 13.7104 |
| 243 | 21.0811 | TIP243 | 16.1133 |
| 244 | 20.758  | TIP244 | 17.8672 |
| 245 | 20.799  | TIP245 | 15.5802 |
| 246 | 20.8283 | TIP246 | 17.2484 |
| 247 | 20.6471 | TIP247 | 13.3027 |
| 248 | 20.6224 | TIP248 | 13.7189 |
| 249 | 20.7583 | TIP249 | 15.5102 |
| 250 | 20.7257 | TIP250 | 14.8775 |
| 251 | 20.806  | TIP251 | 14.8214 |
| 252 | 20.8778 | TIP252 | 15.0859 |
| 253 | 20.7508 | TIP253 | 11.6428 |
| 254 | 20.8557 | TIP254 | 12.2776 |
| 255 | 20.7458 | TIP255 | 14.4247 |
| 256 | 21.055  | TIP256 | 11.7197 |
| 257 | 21.2439 | TIP257 | 18.9831 |
| 258 | 20.9982 | TIP258 | 16.5365 |
| 259 | 21.151  | TIP259 | 13.5082 |
| 260 | 21.3506 | TIP260 | 14.2815 |
| 261 | 21.3888 | TIP261 | 15.5013 |
| 262 | 21.1832 | TIP262 | 17.0069 |
| 263 | 21.2067 | TIP263 | 15.5817 |
| 264 | 21.0993 | TIP264 | 14.5754 |
| 265 | 21.1724 | TIP265 | 14.0702 |
| 266 | 21.1542 | TIP266 | 15.9143 |
| 267 | 21.1908 | TIP267 | 13.7881 |
| 268 | 21.1208 | TIP268 | 14.9673 |
| 269 | 21.1244 | TIP269 | 16.0094 |
| 270 | 21.1418 | TIP270 | 13.4364 |
| 271 | 20.8159 | TIP271 | 15.2592 |
| 272 | 20.9933 | TIP272 | 12.1047 |
| 273 | 20.692  | TIP273 | 14.5171 |
| 274 | 20.9445 | TIP274 | 15.5644 |
| 275 | 20.9183 | TIP275 | 14.7234 |
| 276 | 20.7387 | TIP276 | 12.8136 |
| 277 | 20.6717 | TIP277 | 11.9475 |
| 278 | 20.96   | TIP278 | 13.8161 |
| 279 | 20.7992 | TIP279 | 15.8618 |
| 280 | 21.0854 | TIP280 | 13.5426 |
| 281 | 20.7992 | TIP281 | 15.733  |
| 282 | 20.9496 | TIP282 | 15.3755 |
| 283 | 21.064  | TIP283 | 14.791  |
| 284 | 21.1031 | TIP284 | 13.7029 |
| 285 | 21.0927 | TIP285 | 15.3192 |
| 286 | 21.3199 | TIP286 | 15.0559 |

|     |         |        |         |
|-----|---------|--------|---------|
| 287 | 21.2284 | TIP287 | 13.2284 |
| 288 | 21.1473 | TIP288 | 13.2428 |
| 289 | 21.3002 | TIP289 | 12.1931 |
| 290 | 21.3341 | TIP290 | 16.5092 |
| 291 | 21.016  | TIP291 | 17.0672 |
| 292 | 21.1425 | TIP292 | 14.7819 |
| 293 | 21.2518 | TIP293 | 15.2377 |
| 294 | 21.2368 | TIP294 | 13.9746 |
| 295 | 21.3408 | TIP295 | 15.6004 |
| 296 | 21.6377 | TIP296 | 15.1779 |
| 297 | 21.3924 | TIP297 | 14.4561 |
| 298 | 21.3375 | TIP298 | 15.5703 |
| 299 | 21.3488 | TIP299 | 15.0673 |
| 300 | 21.3558 | TIP300 | 13.0157 |
| 301 | 21.2879 | TIP301 | 14.4652 |
| 302 | 21.16   | TIP302 | 14.7777 |
| 303 | 21.1782 | TIP303 | 12.5443 |
| 304 | 21.16   | TIP304 | 12.4975 |
| 305 | 21.1455 | TIP305 | 16.8515 |
| 306 | 21.0713 | TIP306 | 13.4296 |
| 307 | 20.8777 | TIP307 | 16.2275 |
| 308 | 21.0176 | TIP308 | 14.2502 |
| 309 | 21.0147 | TIP309 | 14.2096 |
| 310 | 21.2034 | TIP310 | 13.6207 |
| 311 | 21.0178 | TIP311 | 12.9268 |
| 312 | 21.1772 | TIP312 | 13.0269 |
| 313 | 21.2197 | TIP313 | 13.1625 |
| 314 | 21.3464 | TIP314 | 12.6714 |
| 315 | 21.2244 | TIP315 | 11.1486 |
| 316 | 21.0836 | TIP316 | 14.3889 |
| 317 | 21.1985 | TIP317 | 16.5227 |
| 318 | 21.0147 | TIP318 | 11.6822 |
| 319 | 21.2138 | TIP319 | 12.113  |
| 320 | 21.2322 | TIP320 | 15.4884 |
| 321 | 21.1759 | TIP321 | 13.0931 |
| 322 | 21.0952 | TIP322 | 14.2423 |
| 323 | 21.0806 | TIP323 | 14.5823 |
| 324 | 21.11   | TIP324 | 15.2413 |
| 325 | 21.3716 | TIP325 | 15.1858 |
| 326 | 21.3537 | TIP326 | 17.803  |
| 327 | 21.314  | TIP327 | 11.006  |
| 328 | 21.3702 | TIP328 | 12.3831 |
| 329 | 21.2143 | TIP329 | 13.842  |
| 330 | 21.2766 | TIP330 | 13.922  |
| 331 | 21.2783 | TIP331 | 12.8991 |



|     |         |        |         |
|-----|---------|--------|---------|
| 332 | 21.7198 | TIP332 | 16.7175 |
| 333 | 21.6142 | TIP333 | 14.7471 |
| 334 | 21.6056 | TIP334 | 11.5501 |
| 335 | 21.6265 | TIP335 | 12.9646 |
| 336 | 21.4646 | TIP336 | 16.1148 |
| 337 | 21.5301 | TIP337 | 14.3515 |
| 338 | 21.4664 | TIP338 | 12.2849 |
| 339 | 21.2398 | TIP339 | 16.9013 |
| 340 | 21.2811 | TIP340 | 14.6404 |
| 341 | 21.3723 | TIP341 | 12.4167 |
| 342 | 21.4266 | TIP342 | 12.6534 |
| 343 | 21.5187 | TIP343 | 14.6157 |
| 344 | 21.4376 | TIP344 | 12.1794 |
| 345 | 21.7437 | TIP345 | 16.6074 |
| 346 | 21.7367 | TIP346 | 14.6061 |
| 347 | 21.4404 | TIP347 | 15.872  |
| 348 | 21.8205 | TIP348 | 16.9048 |
| 349 | 21.6299 | TIP349 | 13.279  |
| 350 | 21.6795 | TIP350 | 15.6938 |
| 351 | 21.6135 | TIP351 | 13.2255 |
| 352 | 21.4712 | TIP352 | 12.3007 |
| 353 | 21.2208 | TIP353 | 12.2756 |
| 354 | 21.471  | TIP354 | 14.3737 |
| 355 | 21.5005 | TIP355 | 12.8655 |
| 356 | 21.5686 | TIP356 | 13.5181 |
| 357 | 21.5078 | TIP357 | 15.2936 |
| 358 | 21.4464 | TIP358 | 14.5946 |
| 359 | 21.8313 | TIP359 | 13.4791 |
| 360 | 21.4838 | TIP360 | 12.7433 |
| 361 | 21.504  | TIP361 | 15.2906 |
| 362 | 21.6405 | TIP362 | 15.5204 |
| 363 | 21.6653 | TIP363 | 12.7813 |
| 364 | 21.5419 | TIP364 | 13.6048 |
| 365 | 21.3242 | TIP365 | 13.3901 |
| 366 | 21.5414 | TIP366 | 15.9959 |
| 367 | 21.4953 | TIP367 | 15.3222 |
| 368 | 21.534  | TIP368 | 12.6275 |
| 369 | 21.476  | TIP369 | 14.1898 |
| 370 | 21.4863 | TIP370 | 15.3964 |
| 371 | 21.5264 | TIP371 | 17.1206 |
| 372 | 21.3583 | TIP372 | 15.6062 |
| 373 | 21.4044 | TIP373 | 12.5048 |
| 374 | 21.6042 | TIP374 | 13.0072 |
| 375 | 21.3662 | TIP375 | 16.8218 |
| 376 | 21.4603 | TIP376 | 14.4415 |

|     |         |        |         |
|-----|---------|--------|---------|
| 377 | 21.4531 | TIP377 | 15.7558 |
| 378 | 21.3669 | TIP378 | 14.1746 |
| 379 | 21.2662 | TIP379 | 14.7233 |
| 380 | 21.4192 | TIP380 | 15.671  |
| 381 | 21.2393 | TIP381 | 13.1989 |
| 382 | 21.288  | TIP382 | 14.1158 |
| 383 | 21.2649 | TIP383 | 11.9054 |
| 384 | 21.2807 | TIP384 | 16.7067 |
| 385 | 21.2754 | TIP385 | 13.0368 |
| 386 | 20.9697 | TIP386 | 14.5197 |
| 387 | 20.9416 | TIP387 | 14.2972 |
| 388 | 21.1657 | TIP388 | 12.7964 |
| 389 | 21.1934 | TIP389 | 16.3262 |
| 390 | 21.0653 | TIP390 | 13.8856 |
| 391 | 20.8965 | TIP391 | 13.2859 |
| 392 | 21.2033 | TIP392 | 15.086  |
| 393 | 21.2792 | TIP393 | 13.0249 |
| 394 | 21.1031 | TIP394 | 12.3614 |
| 395 | 21.1926 | TIP395 | 16.2739 |
| 396 | 21.326  | TIP396 | 16.5909 |
| 397 | 21.4645 | TIP397 | 13.766  |
| 398 | 21.2166 | TIP398 | 14.7574 |
| 399 | 21.081  | TIP399 | 12.8788 |
| 400 | 20.9061 | TIP400 | 13.5054 |
| 401 | 21.1096 | TIP401 | 13.9215 |
| 402 | 21.0738 | TIP402 | 12.5603 |
| 403 | 21.0662 | TIP403 | 12.5603 |
| 404 | 21.0224 | TIP404 | 16.9125 |
| 405 | 20.9955 | TIP405 | 14.9335 |
| 406 | 21.157  | TIP406 | 12.0856 |
| 407 | 21.2876 | TIP407 | 12.926  |
| 408 | 21.1404 | TIP408 | 12.2079 |
| 409 | 21.0783 | TIP409 | 15.6201 |
| 410 | 21.008  | TIP410 | 14.4863 |
| 411 | 20.9734 | TIP411 | 14.1535 |
| 412 | 21.1286 | TIP412 | 13.9328 |
| 413 | 20.8722 | TIP413 | 15.4132 |
| 414 | 20.7473 | TIP414 | 13.51   |
| 415 | 21.0869 | TIP415 | 14.8989 |
| 416 | 20.9088 | TIP416 | 15.8469 |
| 417 | 20.9132 | TIP417 | 13.1298 |
| 418 | 20.7326 | TIP418 | 15.4346 |
| 419 | 20.5876 | TIP419 | 15.3191 |
| 420 | 20.6827 | TIP420 | 14.7781 |
| 421 | 20.7348 | TIP421 | 15.339  |

|     |         |        |         |
|-----|---------|--------|---------|
| 422 | 20.9335 | TIP422 | 15.0828 |
| 423 | 20.8736 | TIP423 | 13.9741 |
| 424 | 21.0646 | TIP424 | 13.412  |
| 425 | 20.9433 | TIP425 | 15.926  |
| 426 | 20.7002 | TIP426 | 15.0708 |
| 427 | 20.6991 | TIP427 | 16.5552 |
| 428 | 20.6709 | TIP428 | 15.4417 |
| 429 | 21.1024 | TIP429 | 13.4534 |
| 430 | 20.8771 | TIP430 | 14.9028 |
| 431 | 20.9538 | TIP431 | 16.3378 |
| 432 | 21.111  | TIP432 | 13.8072 |
| 433 | 21.1729 | TIP433 | 14.4451 |
| 434 | 21.2364 | TIP434 | 13.9362 |
| 435 | 21.1244 | TIP435 | 15.3135 |
| 436 | 21.0976 | TIP436 | 12.4506 |
| 437 | 20.8463 | TIP437 | 16.2042 |
| 438 | 20.952  | TIP438 | 15.6838 |
| 439 | 21.1286 | TIP439 | 16.9014 |
| 440 | 20.852  | TIP440 | 13.0557 |
| 441 | 21.1594 | TIP441 | 12.9173 |
| 442 | 21.2655 | TIP442 | 16.384  |
| 443 | 21.0622 | TIP443 | 16.6281 |
| 444 | 21.0534 | TIP444 | 13.6502 |
| 445 | 21.1268 | TIP445 | 12.5408 |
| 446 | 21.1821 | TIP446 | 13.4324 |
| 447 | 21.2684 | TIP447 | 14.2381 |
| 448 | 20.9836 | TIP448 | 15.5012 |
| 449 | 20.8458 | TIP449 | 16.9337 |
| 450 | 20.9347 | TIP450 | 14.1259 |
| 451 | 21.0517 | TIP451 | 14.4622 |
| 452 | 20.9446 | TIP452 | 14.7025 |
| 453 | 20.8486 | TIP453 | 17.1605 |
| 454 | 20.87   | TIP454 | 13.649  |
| 455 | 20.9749 | TIP455 | 15.5357 |
| 456 | 21.0226 | TIP456 | 15.7572 |
| 457 | 21.1556 | TIP457 | 15.3954 |
| 458 | 20.9476 | TIP458 | 14.1463 |
| 459 | 21.3409 | TIP459 | 14.1572 |
| 460 | 21.1953 | TIP460 | 14.1785 |
| 461 | 21.3264 | TIP461 | 15.0636 |
| 462 | 21.4054 | TIP462 | 13.9317 |
| 463 | 21.3148 | TIP463 | 14.8879 |
| 464 | 21.293  | TIP464 | 12.7474 |
| 465 | 21.3916 | TIP465 | 14.0857 |
| 466 | 21.2558 | TIP466 | 14.3311 |

|     |         |        |         |
|-----|---------|--------|---------|
| 467 | 21.3746 | TIP467 | 16.3088 |
| 468 | 21.3195 | TIP468 | 14.4499 |
| 469 | 21.3139 | TIP469 | 12.7807 |
| 470 | 21.4035 | TIP470 | 15.7131 |
| 471 | 21.2429 | TIP471 | 12.9859 |
| 472 | 21.1468 | TIP472 | 14.9202 |
| 473 | 21.2963 | TIP473 | 15.7214 |
| 474 | 21.3704 | TIP474 | 16.4062 |
| 475 | 21.171  | TIP475 | 12.2012 |
| 476 | 21.4636 | TIP476 | 15.3437 |
| 477 | 21.5429 | TIP477 | 12.0902 |
| 478 | 21.573  | TIP478 | 16.794  |
| 479 | 21.6825 | TIP479 | 16.3676 |
| 480 | 21.6774 | TIP480 | 15.2314 |
| 481 | 21.5465 | TIP481 | 16.452  |
| 482 | 21.1607 | TIP482 | 13.6094 |
| 483 | 21.2416 | TIP483 | 16.5379 |
| 484 | 21.3011 | TIP484 | 11.6191 |
| 485 | 21.2911 | TIP485 | 15.269  |
| 486 | 21.59   | TIP486 | 13.2883 |
| 487 | 21.1499 | TIP487 | 18.1396 |
| 488 | 20.8355 | TIP488 | 12.8994 |
| 489 | 21.0173 | TIP489 | 15.8889 |
| 490 | 21.2943 | TIP490 | 16.1513 |
| 491 | 21.4771 | TIP491 | 14.5459 |
| 492 | 21.287  | TIP492 | 17.8894 |
| 493 | 21.5801 | TIP493 | 13.7644 |
| 494 | 21.4699 | TIP494 | 13.1384 |
| 495 | 21.1841 | TIP495 | 13.6896 |
| 496 | 21.1325 | TIP496 | 13.1786 |
| 497 | 21.1669 | TIP497 | 14.7438 |
| 498 | 21.3604 | TIP498 | 13.3919 |
| 499 | 21.4692 | TIP499 | 15.1747 |
| 500 | 21.4525 | TIP500 | 17.8212 |
| 501 | 21.1072 | TIP501 | 13.8301 |
| 502 | 21.2585 | TIP502 | 17.2204 |
| 503 | 21.4623 | TIP503 | 13.4119 |
| 504 | 21.2857 | TIP504 | 16.0196 |
| 505 | 21.1386 | TIP505 | 16.9677 |
| 506 | 21.2708 | TIP506 | 15.5824 |
| 507 | 21.3877 | TIP507 | 15.9287 |
| 508 | 21.4481 | TIP508 | 16.6781 |
| 509 | 21.4445 | TIP509 | 13.2939 |
| 510 | 21.3693 | TIP510 | 14.8626 |
| 511 | 21.3525 | TIP511 | 14.4517 |

|     |         |        |         |
|-----|---------|--------|---------|
| 512 | 21.4387 | TIP512 | 14.354  |
| 513 | 20.9674 | TIP513 | 12.7405 |
| 514 | 21.1979 | TIP514 | 14.9206 |
| 515 | 21.1522 | TIP515 | 14.0179 |
| 516 | 21.2734 | TIP516 | 15.6937 |
| 517 | 21.274  | TIP517 | 15.0567 |
| 518 | 21.3099 | TIP518 | 13.6585 |
| 519 | 21.5868 | TIP519 | 14.0689 |
| 520 | 21.4245 | TIP520 | 14.8086 |
| 521 | 21.3818 | TIP521 | 14.5385 |
| 522 | 21.2824 | TIP522 | 16.1105 |
| 523 | 21.0669 | TIP523 | 15.5661 |
| 524 | 21.2061 | TIP524 | 17.4609 |
| 525 | 21.2302 | TIP525 | 13.3246 |
| 526 | 21.2628 | TIP526 | 15.1945 |
| 527 | 21.1563 | TIP527 | 14.617  |
| 528 | 21.3004 | TIP528 | 15.7059 |
| 529 | 21.1716 | TIP529 | 18.2512 |
| 530 | 21.5046 | TIP530 | 17.2602 |
| 531 | 21.4269 | TIP531 | 12.2288 |
| 532 | 21.5562 | TIP532 | 14.0897 |
| 533 | 21.3981 | TIP533 | 12.7199 |
| 534 | 21.4429 | TIP534 | 13.3921 |
| 535 | 21.4041 | TIP535 | 14.0037 |
| 536 | 21.3396 | TIP536 | 12.6768 |
| 537 | 21.2902 | TIP537 | 14.5537 |
| 538 | 21.1208 | TIP538 | 16.3857 |
| 539 | 21.1269 | TIP539 | 14.2589 |
| 540 | 21.2066 | TIP540 | 15.5366 |
| 541 | 21.1082 | TIP541 | 14.1122 |
| 542 | 21.1778 | TIP542 | 14.4381 |
| 543 | 21.0055 | TIP543 | 15.7788 |
| 544 | 21.0346 | TIP544 | 16.0616 |
| 545 | 21.2899 | TIP545 | 15.8297 |
| 546 | 21.2574 | TIP546 | 14.4333 |
| 547 | 21.1409 | TIP547 | 15.0359 |
| 548 | 21.2751 | TIP548 | 15.9697 |
| 549 | 21.3626 | TIP549 | 14.5295 |
| 550 | 21.068  | TIP550 | 12.9363 |
| 551 | 21.3482 | TIP551 | 12.9779 |
| 552 | 21.2776 | TIP552 | 14.7579 |
| 553 | 21.4772 | TIP553 | 13.2814 |
| 554 | 21.4016 | TIP554 | 13.9148 |
| 555 | 21.3711 | TIP555 | 15.9525 |
| 556 | 21.2686 | TIP556 | 15.5949 |

|     |         |        |         |
|-----|---------|--------|---------|
| 557 | 21.3882 | TIP557 | 16.7017 |
| 558 | 21.4827 | TIP558 | 12.5207 |
| 559 | 21.6222 | TIP559 | 13.2652 |
| 560 | 21.4198 | TIP560 | 13.6699 |
| 561 | 21.4888 | TIP561 | 12.5266 |
| 562 | 21.5119 | TIP562 | 15.5997 |
| 563 | 21.304  | TIP563 | 15.839  |
| 564 | 21.4447 | TIP564 | 14.0266 |
| 565 | 21.2474 | TIP565 | 16.7564 |
| 566 | 21.3893 | TIP566 | 15.8268 |
| 567 | 21.4316 | TIP567 | 15.6904 |
| 568 | 21.4196 | TIP568 | 12.3254 |
| 569 | 21.5094 | TIP569 | 14.1511 |
| 570 | 21.3567 | TIP570 | 14.3278 |
| 571 | 21.1746 | TIP571 | 11.8555 |
| 572 | 21.2586 | TIP572 | 13.789  |
| 573 | 21.4673 | TIP573 | 16.8215 |
| 574 | 21.2474 | TIP574 | 13.7709 |
| 575 | 21.3402 | TIP575 | 16.2553 |
| 576 | 21.4448 | TIP576 | 14.8284 |
| 577 | 21.2175 | TIP577 | 12.2296 |
| 578 | 21.1832 | TIP578 | 14.7824 |
| 579 | 21.503  | TIP579 | 16.5392 |
| 580 | 21.4271 | TIP580 | 15.5716 |
| 581 | 21.6003 | TIP581 | 13.5772 |
| 582 | 21.3848 | TIP582 | 13.7748 |
| 583 | 21.4072 | TIP583 | 17.6281 |
| 584 | 21.2884 | TIP584 | 13.7553 |
| 585 | 21.42   | TIP585 | 13.3056 |
| 586 | 21.6038 | TIP586 | 14.7679 |
| 587 | 21.8175 | TIP587 | 15.7696 |
| 588 | 21.7042 | TIP588 | 15.3489 |
| 589 | 21.8361 | TIP589 | 12.5455 |
| 590 | 21.8615 | TIP590 | 13.23   |
| 591 | 21.6749 | TIP591 | 16.2124 |
| 592 | 21.4667 | TIP592 | 14.232  |
| 593 | 21.5215 | TIP593 | 15.895  |
| 594 | 21.2975 | TIP594 | 16.3208 |
| 595 | 21.0127 | TIP595 | 15.6542 |
| 596 | 21.125  | TIP596 | 16.511  |
| 597 | 21.1917 | TIP597 | 17.615  |
| 598 | 21.0596 | TIP598 | 13.196  |
| 599 | 20.9422 | TIP599 | 13.4351 |
| 600 | 21.1258 | TIP600 | 15.7717 |
| 601 | 21.2196 | TIP601 | 16.0135 |

|     |         |        |         |
|-----|---------|--------|---------|
| 602 | 21.0438 | TIP602 | 14.7623 |
| 603 | 21.2904 | TIP603 | 14.9026 |
| 604 | 21.304  | TIP604 | 15.5825 |
| 605 | 21.4486 | TIP605 | 15.2261 |
| 606 | 21.298  | TIP606 | 13.3386 |
| 607 | 21.358  | TIP607 | 14.7369 |
| 608 | 21.3079 | TIP608 | 14.0217 |
| 609 | 21.2451 | TIP609 | 14.9566 |
| 610 | 21.3412 | TIP610 | 13.4623 |
| 611 | 21.3422 | TIP611 | 13.861  |
| 612 | 21.3172 | TIP612 | 15.7693 |
| 613 | 21.3143 | TIP613 | 14.2447 |
| 614 | 21.5094 | TIP614 | 13.3493 |
| 615 | 21.2664 | TIP615 | 15.1592 |
| 616 | 21.1161 | TIP616 | 15.8214 |
| 617 | 21.0975 | TIP617 | 17.6201 |
| 618 | 21.2356 | TIP618 | 15.0482 |
| 619 | 21.0097 | TIP619 | 16.5369 |
| 620 | 21.0393 | TIP620 | 14.1242 |
| 621 | 20.9886 | TIP621 | 12.7434 |
| 622 | 21.0586 | TIP622 | 11.6811 |
| 623 | 21.1184 | TIP623 | 14.9027 |
| 624 | 21.0487 | TIP624 | 14.3859 |
| 625 | 21.2931 | TIP625 | 16.1515 |
| 626 | 21.2168 | TIP626 | 13.8431 |
| 627 | 21.3455 | TIP627 | 12.5809 |
| 628 | 21.6018 | TIP628 | 17.3149 |
| 629 | 21.3675 | TIP629 | 14.725  |
| 630 | 21.3084 | TIP630 | 13.9634 |
| 631 | 21.2798 | TIP631 | 15.6436 |
| 632 | 21.5503 | TIP632 | 14.9301 |
| 633 | 21.3852 | TIP633 | 15.4863 |
| 634 | 21.3585 | TIP634 | 15.775  |
| 635 | 21.3144 | TIP635 | 15.1884 |
| 636 | 21.4086 | TIP636 | 14.2652 |
| 637 | 21.4095 | TIP637 | 14.9629 |
| 638 | 21.2906 | TIP638 | 13.7849 |
| 639 | 21.3223 | TIP639 | 15.8193 |
| 640 | 21.3502 | TIP640 | 14.1767 |
| 641 | 21.3141 | TIP641 | 14.3476 |
| 642 | 21.2653 | TIP642 | 14.8817 |
| 643 | 21.522  | TIP643 | 14.6875 |
| 644 | 21.391  | TIP644 | 14.93   |
| 645 | 21.4459 | TIP645 | 15.5945 |
| 646 | 21.7102 | TIP646 | 15.8497 |

|     |         |        |         |
|-----|---------|--------|---------|
| 647 | 21.3432 | TIP647 | 12.2617 |
| 648 | 21.4421 | TIP648 | 15.3193 |
| 649 | 21.4689 | TIP649 | 15.6317 |
| 650 | 21.7052 | TIP650 | 15.09   |
| 651 | 21.5123 | TIP651 | 16.3371 |
| 652 | 21.5417 | TIP652 | 14.9695 |
| 653 | 21.4299 | TIP653 | 15.202  |
| 654 | 21.3567 | TIP654 | 15.8861 |
| 655 | 21.3928 | TIP655 | 16.2771 |
| 656 | 21.3122 | TIP656 | 14.3    |
| 657 | 21.4508 | TIP657 | 10.6644 |
| 658 | 21.4051 | TIP658 | 12.0977 |
| 659 | 21.3376 | TIP659 | 14.6474 |
| 660 | 21.316  | TIP660 | 11.8649 |
| 661 | 21.5729 | TIP661 | 15.2924 |
| 662 | 21.1388 | TIP662 | 15.0881 |
| 663 | 21.1168 | TIP663 | 14.4841 |
| 664 | 21.4969 | TIP664 | 15.9583 |
| 665 | 21.2296 | TIP665 | 14.7348 |
| 666 | 21.2995 | TIP666 | 15.0225 |
| 667 | 21.3081 | TIP667 | 14.0506 |
| 668 | 21.2224 | TIP668 | 15.4595 |
| 669 | 21.2496 | TIP669 | 14.1969 |
| 670 | 21.3214 | TIP670 | 13.1165 |
| 671 | 21.2679 | TIP671 | 15.3722 |
| 672 | 21.2856 | TIP672 | 17.1535 |
| 673 | 21.1068 | TIP673 | 15.6845 |
| 674 | 21.0539 | TIP674 | 15.599  |
| 675 | 21.1453 | TIP675 | 15.0763 |
| 676 | 21.4519 | TIP676 | 15.2342 |
| 677 | 21.4342 | TIP677 | 15.9052 |
| 678 | 21.3656 | SOD678 | 12.5096 |
| 679 | 21.6344 | SOD679 | 11.9116 |
| 680 | 21.3783 | CLA680 | 13.2307 |
| 681 | 21.5383 | CLA681 | 12.5873 |
| 682 | 21.0705 | CLA682 | 12.0278 |
| 683 | 21.436  |        |         |
| 684 | 21.2677 |        |         |
| 685 | 21.2531 |        |         |
| 686 | 21.2095 |        |         |
| 687 | 21.5088 |        |         |
| 688 | 21.198  |        |         |
| 689 | 21.4042 |        |         |
| 690 | 21.1738 |        |         |
| 691 | 21.1856 |        |         |



|     |         |
|-----|---------|
| 692 | 21.2653 |
| 693 | 21.2397 |
| 694 | 20.864  |
| 695 | 20.8789 |
| 696 | 21.1528 |
| 697 | 21.1811 |
| 698 | 21.0078 |
| 699 | 21.2802 |
| 700 | 21.1513 |

**Table S4** .RMSD and RMSF values of RMSD-S3- Meldonium.

| Index | RMSD-S3- Meldonium | Residue | RMSF-S3- Meldonium |
|-------|--------------------|---------|--------------------|
| 1     | 0                  | UNK0    | 9.7678             |
| 2     | 8.97145            | TIP2    | 15.9756            |
| 3     | 10.3011            | TIP3    | 14.2927            |
| 4     | 11.0922            | TIP4    | 13.8502            |
| 5     | 12.7315            | TIP5    | 14.7601            |
| 6     | 13.4038            | TIP6    | 14.047             |
| 7     | 13.9858            | TIP7    | 15.557             |
| 8     | 14.6446            | TIP8    | 14.7373            |
| 9     | 14.8229            | TIP9    | 12.1952            |
| 10    | 14.9169            | TIP10   | 14.5653            |
| 11    | 15.0644            | TIP11   | 14.7593            |
| 12    | 15.1924            | TIP12   | 14.6678            |
| 13    | 15.4014            | TIP13   | 15.0761            |
| 14    | 15.7815            | TIP14   | 14.396             |
| 15    | 15.9559            | TIP15   | 15.7187            |
| 16    | 16.6937            | TIP16   | 12.3635            |
| 17    | 16.4976            | TIP17   | 12.3065            |
| 18    | 16.8568            | TIP18   | 15.5428            |
| 19    | 16.7646            | TIP19   | 16.221             |
| 20    | 16.7797            | TIP20   | 13.4439            |
| 21    | 16.6867            | TIP21   | 12.7433            |
| 22    | 16.9614            | TIP22   | 14.8229            |
| 23    | 17.2025            | TIP23   | 15.0925            |
| 24    | 17.2916            | TIP24   | 14.2591            |
| 25    | 17.4358            | TIP25   | 14.1057            |
| 26    | 17.1446            | TIP26   | 12.7274            |
| 27    | 17.3573            | TIP27   | 14.6324            |
| 28    | 17.3753            | TIP28   | 14.5254            |
| 29    | 17.525             | TIP29   | 14.5063            |
| 30    | 17.8076            | TIP30   | 14.9374            |
| 31    | 17.7108            | TIP31   | 15.2571            |

|    |         |       |         |
|----|---------|-------|---------|
| 32 | 17.8159 | TIP32 | 14.3519 |
| 33 | 18.0769 | TIP33 | 13.3843 |
| 34 | 17.9641 | TIP34 | 13.5617 |
| 35 | 17.7056 | TIP35 | 13.6886 |
| 36 | 17.885  | TIP36 | 14.4184 |
| 37 | 18.115  | TIP37 | 15.4676 |
| 38 | 18.0816 | TIP38 | 15.2281 |
| 39 | 18.2855 | TIP39 | 14.3649 |
| 40 | 18.6961 | TIP40 | 13.6972 |
| 41 | 18.5569 | TIP41 | 13.5298 |
| 42 | 18.5177 | TIP42 | 14.2173 |
| 43 | 18.6303 | TIP43 | 16.2857 |
| 44 | 18.7809 | TIP44 | 15.4091 |
| 45 | 18.8978 | TIP45 | 15.8692 |
| 46 | 18.9417 | TIP46 | 16.5985 |
| 47 | 18.7398 | TIP47 | 16.6181 |
| 48 | 19.1048 | TIP48 | 14.4086 |
| 49 | 19.2421 | TIP49 | 14.8152 |
| 50 | 19.0953 | TIP50 | 14.9174 |
| 51 | 19.3654 | TIP51 | 15.2551 |
| 52 | 19.3316 | TIP52 | 14.8013 |
| 53 | 19.2767 | TIP53 | 15.1561 |
| 54 | 19.223  | TIP54 | 13.6185 |
| 55 | 19.1059 | TIP55 | 14.2902 |
| 56 | 19.3478 | TIP56 | 13.6496 |
| 57 | 19.3465 | TIP57 | 14.8957 |
| 58 | 19.7831 | TIP58 | 14.8138 |
| 59 | 19.6886 | TIP59 | 14.3631 |
| 60 | 19.6534 | TIP60 | 14.9082 |
| 61 | 19.9497 | TIP61 | 14.7093 |
| 62 | 19.9427 | TIP62 | 15.4338 |
| 63 | 19.7446 | TIP63 | 14.2156 |
| 64 | 19.701  | TIP64 | 15.4789 |
| 65 | 19.4664 | TIP65 | 16.1452 |
| 66 | 19.4244 | TIP66 | 15.7174 |
| 67 | 19.2161 | TIP67 | 13.9075 |
| 68 | 19.2112 | TIP68 | 16.7415 |
| 69 | 19.1607 | TIP69 | 16.4301 |
| 70 | 19.2413 | TIP70 | 13.8569 |
| 71 | 19.1183 | TIP71 | 13.8078 |
| 72 | 18.9931 | TIP72 | 14.5416 |
| 73 | 19.265  | TIP73 | 13.7483 |
| 74 | 19.3821 | TIP74 | 15.0796 |
| 75 | 19.365  | TIP75 | 15.5204 |
| 76 | 19.52   | TIP76 | 15.1533 |

|     |         |        |         |
|-----|---------|--------|---------|
| 77  | 19.8453 | TIP77  | 15.4097 |
| 78  | 19.6471 | TIP78  | 12.8866 |
| 79  | 19.529  | TIP79  | 13.2237 |
| 80  | 19.1714 | TIP80  | 14.7199 |
| 81  | 19.4448 | TIP81  | 11.7304 |
| 82  | 19.4667 | TIP82  | 14.4556 |
| 83  | 19.1782 | TIP83  | 14.7549 |
| 84  | 19.2587 | TIP84  | 15.2626 |
| 85  | 19.2601 | TIP85  | 13.4957 |
| 86  | 19.2692 | TIP86  | 15.1013 |
| 87  | 19.3841 | TIP87  | 14.9022 |
| 88  | 19.5763 | TIP88  | 14.6649 |
| 89  | 19.7044 | TIP89  | 13.3595 |
| 90  | 19.5249 | TIP90  | 13.748  |
| 91  | 19.3332 | TIP91  | 13.8101 |
| 92  | 19.5175 | TIP92  | 12.958  |
| 93  | 19.4899 | TIP93  | 15.2965 |
| 94  | 19.5326 | TIP94  | 13.9457 |
| 95  | 20.1009 | TIP95  | 13.7832 |
| 96  | 20.0689 | TIP96  | 13.6183 |
| 97  | 20.1045 | TIP97  | 15.1225 |
| 98  | 19.9796 | TIP98  | 14.6629 |
| 99  | 19.8724 | TIP99  | 14.4428 |
| 100 | 19.8108 | TIP100 | 13.5551 |
| 101 | 20.3807 | TIP101 | 14.3972 |
| 102 | 20.3595 | TIP102 | 15.0407 |
| 103 | 20.3809 | TIP103 | 13.7518 |
| 104 | 20.4178 | TIP104 | 13.4366 |
| 105 | 20.1549 | TIP105 | 15.592  |
| 106 | 20.1436 | TIP106 | 14.3103 |
| 107 | 20.169  | TIP107 | 14.8702 |
| 108 | 20.1927 | TIP108 | 15.822  |
| 109 | 20.0976 | TIP109 | 14.2097 |
| 110 | 20.1429 | TIP110 | 15.7969 |
| 111 | 20.5103 | TIP111 | 14.5214 |
| 112 | 20.4989 | TIP112 | 14.4286 |
| 113 | 20.4955 | TIP113 | 14.4838 |
| 114 | 20.5954 | TIP114 | 15.19   |
| 115 | 20.6572 | TIP115 | 15.1796 |
| 116 | 20.6399 | TIP116 | 14.3808 |
| 117 | 20.4846 | TIP117 | 14.9854 |
| 118 | 20.4288 | TIP118 | 13.8857 |
| 119 | 20.3916 | TIP119 | 15.7655 |
| 120 | 20.2996 | TIP120 | 14.3149 |
| 121 | 20.5622 | TIP121 | 12.5861 |

|     |         |        |         |
|-----|---------|--------|---------|
| 122 | 20.4069 | TIP122 | 13.2912 |
| 123 | 20.4404 | TIP123 | 14.4123 |
| 124 | 20.4382 | TIP124 | 15.1593 |
| 125 | 20.4363 | TIP125 | 13.9432 |
| 126 | 20.3084 | TIP126 | 16.0782 |
| 127 | 20.0588 | TIP127 | 14.6213 |
| 128 | 20.338  | TIP128 | 15.2255 |
| 129 | 20.363  | TIP129 | 13.5715 |
| 130 | 20.2895 | TIP130 | 13.5675 |
| 131 | 20.5136 | TIP131 | 13.6173 |
| 132 | 20.3439 | TIP132 | 15.9816 |
| 133 | 19.9536 | TIP133 | 15.4008 |
| 134 | 19.961  | TIP134 | 15.7763 |
| 135 | 19.9616 | TIP135 | 14.0758 |
| 136 | 19.974  | TIP136 | 15.2429 |
| 137 | 20.0438 | TIP137 | 14.3051 |
| 138 | 20.1088 | TIP138 | 15.0677 |
| 139 | 20.2086 | TIP139 | 13.1729 |
| 140 | 20.2486 | TIP140 | 14.4927 |
| 141 | 20.1247 | TIP141 | 14.4871 |
| 142 | 20.1121 | TIP142 | 14.5711 |
| 143 | 20.0251 | TIP143 | 14.3479 |
| 144 | 20.1375 | TIP144 | 15.6228 |
| 145 | 20.341  | TIP145 | 12.7883 |
| 146 | 20.0051 | TIP146 | 14.572  |
| 147 | 20.2758 | TIP147 | 14.3713 |
| 148 | 20.526  | TIP148 | 13.8821 |
| 149 | 20.3255 | TIP149 | 13.2055 |
| 150 | 20.1577 | TIP150 | 13.6856 |
| 151 | 20.0932 | TIP151 | 12.7366 |
| 152 | 20.2565 | TIP152 | 13.9722 |
| 153 | 20.2982 | TIP153 | 15.6916 |
| 154 | 20.5321 | TIP154 | 12.1624 |
| 155 | 20.2164 | TIP155 | 14.8468 |
| 156 | 20.3467 | TIP156 | 15.0928 |
| 157 | 20.1569 | TIP157 | 13.9918 |
| 158 | 20.3483 | TIP158 | 13.7615 |
| 159 | 20.2878 | TIP159 | 14.7493 |
| 160 | 19.8659 | TIP160 | 14.9261 |
| 161 | 20.0529 | TIP161 | 14.5962 |
| 162 | 20.2017 | TIP162 | 12.153  |
| 163 | 20.1375 | TIP163 | 13.8644 |
| 164 | 20.0055 | TIP164 | 16.0834 |
| 165 | 20.1857 | TIP165 | 16.5345 |
| 166 | 20.321  | TIP166 | 14.7875 |

|     |         |        |         |
|-----|---------|--------|---------|
| 167 | 20.5676 | TIP167 | 14.4151 |
| 168 | 20.4626 | TIP168 | 14.8413 |
| 169 | 20.8645 | TIP169 | 13.9465 |
| 170 | 20.7584 | TIP170 | 13.729  |
| 171 | 20.8076 | TIP171 | 14.6853 |
| 172 | 20.787  | TIP172 | 14.641  |
| 173 | 20.5528 | TIP173 | 13.5058 |
| 174 | 20.6033 | TIP174 | 15.1172 |
| 175 | 20.4441 | TIP175 | 13.6155 |
| 176 | 20.4305 | TIP176 | 13.8    |
| 177 | 20.4105 | TIP177 | 16.1899 |
| 178 | 20.3544 | TIP178 | 14.5979 |
| 179 | 20.3798 | TIP179 | 15.3664 |
| 180 | 20.2505 | TIP180 | 16.4268 |
| 181 | 20.2547 | TIP181 | 14.8294 |
| 182 | 20.3052 | TIP182 | 16.1472 |
| 183 | 20.4859 | TIP183 | 15.0359 |
| 184 | 20.5039 | TIP184 | 13.0346 |
| 185 | 20.3894 | TIP185 | 14.3168 |
| 186 | 20.5973 | TIP186 | 14.9101 |
| 187 | 20.2641 | TIP187 | 13.6911 |
| 188 | 20.3755 | TIP188 | 14.1617 |
| 189 | 20.8044 | TIP189 | 16.2978 |
| 190 | 20.5617 | TIP190 | 14.1523 |
| 191 | 20.283  | TIP191 | 15.0553 |
| 192 | 20.051  | TIP192 | 14.4867 |
| 193 | 20.3984 | TIP193 | 15.9045 |
| 194 | 20.4497 | TIP194 | 14.5257 |
| 195 | 20.4971 | TIP195 | 13.6999 |
| 196 | 20.3958 | TIP196 | 15.2621 |
| 197 | 20.5981 | TIP197 | 14.9696 |
| 198 | 20.3242 | TIP198 | 15.034  |
| 199 | 20.2157 | TIP199 | 15.507  |
| 200 | 20.4779 | TIP200 | 15.7588 |
| 201 | 20.6824 | TIP201 | 13.6281 |
| 202 | 20.8464 | TIP202 | 15.2399 |
| 203 | 20.7364 | TIP203 | 15.2658 |
| 204 | 20.6965 | TIP204 | 14.94   |
| 205 | 20.916  | TIP205 | 14.7489 |
| 206 | 20.96   | TIP206 | 13.5754 |
| 207 | 20.8844 | TIP207 | 14.3752 |
| 208 | 20.7921 | TIP208 | 14.9497 |
| 209 | 20.9629 | TIP209 | 14.6337 |
| 210 | 21.0815 | TIP210 | 14.0065 |
| 211 | 20.8861 | TIP211 | 12.0106 |

|     |         |        |         |
|-----|---------|--------|---------|
| 212 | 20.8436 | TIP212 | 12.967  |
| 213 | 21.0037 | TIP213 | 12.244  |
| 214 | 20.9742 | TIP214 | 14.659  |
| 215 | 20.7147 | TIP215 | 14.5305 |
| 216 | 20.5648 | TIP216 | 14.9103 |
| 217 | 20.7056 | TIP217 | 14.3067 |
| 218 | 21.0033 | TIP218 | 15.6976 |
| 219 | 20.6019 | TIP219 | 13.2244 |
| 220 | 20.747  | TIP220 | 14.1394 |
| 221 | 20.822  | TIP221 | 13.2294 |
| 222 | 20.6659 | TIP222 | 16.4693 |
| 223 | 20.6155 | TIP223 | 15.4613 |
| 224 | 20.7395 | TIP224 | 15.3613 |
| 225 | 20.883  | TIP225 | 14.4888 |
| 226 | 20.7468 | TIP226 | 15.1475 |
| 227 | 20.7746 | TIP227 | 13.2524 |
| 228 | 20.8853 | TIP228 | 15.1079 |
| 229 | 20.8286 | TIP229 | 15.0803 |
| 230 | 21.0295 | TIP230 | 14.9194 |
| 231 | 21.2758 | TIP231 | 12.8214 |
| 232 | 21.2384 | TIP232 | 15.5808 |
| 233 | 21.2941 | TIP233 | 15.3655 |
| 234 | 21.0799 | TIP234 | 14.5149 |
| 235 | 20.9121 | TIP235 | 13.2089 |
| 236 | 20.9703 | TIP236 | 12.8684 |
| 237 | 20.8227 | TIP237 | 14.625  |
| 238 | 20.9341 | TIP238 | 14.1807 |
| 239 | 20.7288 | TIP239 | 13.791  |
| 240 | 21.223  | TIP240 | 13.0041 |
| 241 | 20.891  | TIP241 | 12.3968 |
| 242 | 20.8753 | TIP242 | 13.8736 |
| 243 | 20.7657 | TIP243 | 13.8604 |
| 244 | 20.8687 | TIP244 | 15.7643 |
| 245 | 20.9512 | TIP245 | 12.2873 |
| 246 | 20.9574 | TIP246 | 14.653  |
| 247 | 20.8569 | TIP247 | 15.656  |
| 248 | 20.6091 | TIP248 | 13.7881 |
| 249 | 20.5016 | TIP249 | 14.3988 |
| 250 | 20.7886 | TIP250 | 13.9255 |
| 251 | 20.6655 | TIP251 | 14.4943 |
| 252 | 21.0199 | TIP252 | 13.3362 |
| 253 | 20.7433 | TIP253 | 14.5707 |
| 254 | 20.746  | TIP254 | 16.2088 |
| 255 | 20.6238 | TIP255 | 15.4524 |
| 256 | 20.5664 | TIP256 | 13.0543 |

|     |         |        |         |
|-----|---------|--------|---------|
| 257 | 20.5071 | TIP257 | 13.9085 |
| 258 | 20.6075 | TIP258 | 13.0778 |
| 259 | 20.7422 | TIP259 | 15.654  |
| 260 | 20.7007 | TIP260 | 15.0329 |
| 261 | 20.6385 | TIP261 | 13.4933 |
| 262 | 20.563  | TIP262 | 13.7038 |
| 263 | 20.7739 | TIP263 | 13.7202 |
| 264 | 20.6523 | TIP264 | 14.8366 |
| 265 | 20.4201 | TIP265 | 14.0436 |
| 266 | 20.4481 | TIP266 | 14.5202 |
| 267 | 20.1872 | TIP267 | 14.8189 |
| 268 | 20.6961 | TIP268 | 13.4526 |
| 269 | 20.7682 | TIP269 | 15.1248 |
| 270 | 20.6645 | TIP270 | 11.4219 |
| 271 | 21.0226 | TIP271 | 14.8435 |
| 272 | 21.1098 | TIP272 | 13.8641 |
| 273 | 20.7392 | TIP273 | 15.9676 |
| 274 | 20.8905 | TIP274 | 13.5376 |
| 275 | 20.9149 | TIP275 | 13.4768 |
| 276 | 21.0323 | TIP276 | 14.3113 |
| 277 | 20.723  | TIP277 | 14.2735 |
| 278 | 20.6738 | TIP278 | 15.1451 |
| 279 | 20.6378 | TIP279 | 16.1154 |
| 280 | 20.6575 | TIP280 | 14.4912 |
| 281 | 20.639  | TIP281 | 15.7233 |
| 282 | 20.5868 | TIP282 | 14.3252 |
| 283 | 20.5949 | TIP283 | 16.289  |
| 284 | 20.5075 | TIP284 | 14.2759 |
| 285 | 20.8279 | TIP285 | 15.0939 |
| 286 | 20.7063 | TIP286 | 14.727  |
| 287 | 20.3193 | TIP287 | 12.2356 |
| 288 | 20.5076 | TIP288 | 13.1079 |
| 289 | 20.5415 | TIP289 | 12.7396 |
| 290 | 20.3081 | TIP290 | 14.3181 |
| 291 | 20.1008 | TIP291 | 14.5839 |
| 292 | 20.1451 | TIP292 | 16.2264 |
| 293 | 20.1184 | TIP293 | 14.336  |
| 294 | 20.15   | TIP294 | 14.5879 |
| 295 | 20.2405 | TIP295 | 15.7804 |
| 296 | 20.3593 | TIP296 | 15.5794 |
| 297 | 20.2813 | TIP297 | 14.1574 |
| 298 | 20.4352 | TIP298 | 15.443  |
| 299 | 20.7111 | TIP299 | 13.6366 |
| 300 | 20.3975 | TIP300 | 13.7447 |
| 301 | 20.4535 | TIP301 | 14.9476 |

|     |         |        |         |
|-----|---------|--------|---------|
| 302 | 20.3562 | TIP302 | 15.9628 |
| 303 | 20.4402 | TIP303 | 15.4814 |
| 304 | 20.1706 | TIP304 | 15.8792 |
| 305 | 20.0428 | TIP305 | 14.6647 |
| 306 | 20.3484 | TIP306 | 15.982  |
| 307 | 20.361  | TIP307 | 11.8725 |
| 308 | 20.244  | TIP308 | 14.9296 |
| 309 | 20.2364 | TIP309 | 16.4698 |
| 310 | 20.2748 | TIP310 | 14.6914 |
| 311 | 20.6872 | TIP311 | 14.4216 |
| 312 | 20.586  | TIP312 | 15.0766 |
| 313 | 20.6172 | TIP313 | 14.1327 |
| 314 | 20.6105 | TIP314 | 14.4396 |
| 315 | 20.4334 | TIP315 | 14.1398 |
| 316 | 20.3222 | TIP316 | 15.2925 |
| 317 | 20.2667 | TIP317 | 15.2934 |
| 318 | 20.0798 | TIP318 | 13.4454 |
| 319 | 20.0164 | TIP319 | 14.0564 |
| 320 | 20.2525 | TIP320 | 13.5813 |
| 321 | 20.5346 | TIP321 | 13.4496 |
| 322 | 20.7689 | TIP322 | 14.8322 |
| 323 | 20.7808 | TIP323 | 13.6247 |
| 324 | 20.6218 | TIP324 | 14.4436 |
| 325 | 20.7215 | TIP325 | 15.1969 |
| 326 | 20.4921 | TIP326 | 15.0449 |
| 327 | 20.2923 | TIP327 | 12.755  |
| 328 | 20.4533 | TIP328 | 16.5489 |
| 329 | 20.5534 | TIP329 | 15.3126 |
| 330 | 20.6415 | TIP330 | 12.598  |
| 331 | 20.7208 | TIP331 | 12.8748 |
| 332 | 20.7052 | TIP332 | 14.8062 |
| 333 | 20.7731 | TIP333 | 14.081  |
| 334 | 20.7004 | TIP334 | 14.3225 |
| 335 | 20.6319 | TIP335 | 13.4926 |
| 336 | 20.3819 | TIP336 | 15.299  |
| 337 | 20.8491 | TIP337 | 14.6663 |
| 338 | 20.7173 | TIP338 | 14.5009 |
| 339 | 20.6542 | TIP339 | 12.9623 |
| 340 | 20.7026 | TIP340 | 12.6825 |
| 341 | 20.7378 | TIP341 | 14.0504 |
| 342 | 20.5804 | TIP342 | 15.3423 |
| 343 | 20.5878 | TIP343 | 13.6271 |
| 344 | 20.4924 | TIP344 | 14.2585 |
| 345 | 20.337  | TIP345 | 14.9477 |
| 346 | 20.2891 | TIP346 | 13.7055 |



|     |         |        |         |
|-----|---------|--------|---------|
| 347 | 20.3291 | TIP347 | 15.306  |
| 348 | 20.3738 | TIP348 | 12.7875 |
| 349 | 20.1615 | TIP349 | 14.7867 |
| 350 | 20.2966 | TIP350 | 15.0388 |
| 351 | 20.3215 | TIP351 | 12.8857 |
| 352 | 20.2991 | TIP352 | 15.4965 |
| 353 | 20.3325 | TIP353 | 14.6248 |
| 354 | 20.329  | TIP354 | 13.5862 |
| 355 | 20.4252 | TIP355 | 12.6938 |
| 356 | 20.5127 | TIP356 | 15.5699 |
| 357 | 20.4171 | TIP357 | 15.197  |
| 358 | 20.0425 | TIP358 | 13.7126 |
| 359 | 19.9563 | TIP359 | 14.4492 |
| 360 | 20.0094 | TIP360 | 13.6262 |
| 361 | 20.0802 | TIP361 | 15.085  |
| 362 | 19.6894 | TIP362 | 14.7098 |
| 363 | 19.8873 | TIP363 | 13.5168 |
| 364 | 20.0503 | TIP364 | 15.6016 |
| 365 | 20.0651 | TIP365 | 13.2064 |
| 366 | 20.1121 | TIP366 | 14.1128 |
| 367 | 20.0146 | TIP367 | 15.1391 |
| 368 | 19.8145 | TIP368 | 13.6576 |
| 369 | 19.615  | TIP369 | 14.055  |
| 370 | 19.8645 | TIP370 | 13.1341 |
| 371 | 19.7778 | TIP371 | 14.4108 |
| 372 | 19.8525 | TIP372 | 14.241  |
| 373 | 20.3124 | TIP373 | 15.2215 |
| 374 | 20.2808 | TIP374 | 12.9343 |
| 375 | 20.3274 | TIP375 | 14.381  |
| 376 | 20.3069 | TIP376 | 12.9521 |
| 377 | 20.213  | TIP377 | 14.9915 |
| 378 | 20.3313 | TIP378 | 15.0264 |
| 379 | 19.8082 | TIP379 | 15.3292 |
| 380 | 19.8966 | TIP380 | 16.1793 |
| 381 | 19.9631 | TIP381 | 16.5541 |
| 382 | 20.0444 | TIP382 | 15.6423 |
| 383 | 20.216  | TIP383 | 14.2861 |
| 384 | 20.0079 | TIP384 | 14.722  |
| 385 | 19.8415 | TIP385 | 15.0893 |
| 386 | 19.731  | TIP386 | 15.7679 |
| 387 | 20.099  | TIP387 | 13.814  |
| 388 | 20.323  | TIP388 | 13.1871 |
| 389 | 20.3535 | TIP389 | 13.7918 |
| 390 | 20.395  | TIP390 | 13.4764 |
| 391 | 20.2207 | TIP391 | 14.6315 |

|     |         |        |         |
|-----|---------|--------|---------|
| 392 | 20.2906 | TIP392 | 13.1676 |
| 393 | 20.4165 | TIP393 | 14.9819 |
| 394 | 20.3897 | TIP394 | 15.1754 |
| 395 | 20.5028 | TIP395 | 15.353  |
| 396 | 20.2691 | TIP396 | 15.3663 |
| 397 | 20.1439 | TIP397 | 16.6139 |
| 398 | 19.8371 | TIP398 | 14.2626 |
| 399 | 19.9136 | TIP399 | 13.7646 |
| 400 | 20.37   | TIP400 | 14.5741 |
| 401 | 20.0954 | TIP401 | 14.6368 |
| 402 | 20.2848 | TIP402 | 15.0402 |
| 403 | 20.0713 | TIP403 | 13.2616 |
| 404 | 19.7706 | TIP404 | 14.5084 |
| 405 | 20.0198 | TIP405 | 12.8655 |
| 406 | 20.1171 | TIP406 | 14.398  |
| 407 | 19.8175 | TIP407 | 14.8726 |
| 408 | 20.001  | TIP408 | 15.6551 |
| 409 | 20.0356 | TIP409 | 14.9741 |
| 410 | 19.792  | TIP410 | 13.049  |
| 411 | 20.1056 | TIP411 | 12.7497 |
| 412 | 20.0955 | TIP412 | 15.8873 |
| 413 | 20.3286 | TIP413 | 14.2334 |
| 414 | 20.3853 | TIP414 | 15.0023 |
| 415 | 20.6068 | TIP415 | 14.5247 |
| 416 | 20.2638 | TIP416 | 15.1652 |
| 417 | 20.2295 | TIP417 | 13.7473 |
| 418 | 20.2031 | TIP418 | 15.4204 |
| 419 | 19.9179 | TIP419 | 13.2379 |
| 420 | 19.961  | TIP420 | 13.8362 |
| 421 | 19.889  | TIP421 | 12.3695 |
| 422 | 19.9303 | TIP422 | 14.0735 |
| 423 | 19.7035 | TIP423 | 13.691  |
| 424 | 19.8051 | TIP424 | 14.827  |
| 425 | 20.0447 | TIP425 | 13.1777 |
| 426 | 19.9252 | TIP426 | 12.3614 |
| 427 | 19.984  | TIP427 | 15.6254 |
| 428 | 20.0663 | TIP428 | 13.0147 |
| 429 | 19.5825 | TIP429 | 15.0293 |
| 430 | 19.6836 | TIP430 | 14.7812 |
| 431 | 19.6635 | TIP431 | 13.3049 |
| 432 | 19.7273 | TIP432 | 13.8596 |
| 433 | 19.8235 | TIP433 | 14.424  |
| 434 | 19.6235 | TIP434 | 14.6042 |
| 435 | 19.7507 | TIP435 | 13.7925 |
| 436 | 20.055  | TIP436 | 13.6382 |

|     |         |        |         |
|-----|---------|--------|---------|
| 437 | 19.8767 | TIP437 | 14.2253 |
| 438 | 20.1806 | TIP438 | 15.3381 |
| 439 | 20.2996 | TIP439 | 14.0861 |
| 440 | 20.177  | TIP440 | 13.2697 |
| 441 | 19.8884 | TIP441 | 15.1223 |
| 442 | 20.1114 | TIP442 | 14.1147 |
| 443 | 20.1771 | TIP443 | 14.8169 |
| 444 | 20.2039 | TIP444 | 13.8422 |
| 445 | 20.4399 | TIP445 | 13.4189 |
| 446 | 20.3149 | TIP446 | 14.3568 |
| 447 | 20.3004 | TIP447 | 15.3315 |
| 448 | 20.532  | TIP448 | 15.3247 |
| 449 | 20.2133 | TIP449 | 14.7218 |
| 450 | 19.9597 | TIP450 | 15.1454 |
| 451 | 20.1619 | TIP451 | 13.0782 |
| 452 | 20.2856 | TIP452 | 15.1595 |
| 453 | 20.2273 | TIP453 | 16.9909 |
| 454 | 20.4887 | TIP454 | 14.3981 |
| 455 | 20.4648 | TIP455 | 13.7768 |
| 456 | 20.481  | TIP456 | 15.2041 |
| 457 | 20.3325 | TIP457 | 13.6273 |
| 458 | 20.4941 | TIP458 | 13.7585 |
| 459 | 20.4839 | TIP459 | 15.1131 |
| 460 | 20.8725 | TIP460 | 14.5467 |
| 461 | 20.4738 | TIP461 | 13.0224 |
| 462 | 20.4871 | TIP462 | 12.5809 |
| 463 | 20.3909 | TIP463 | 15.0233 |
| 464 | 20.393  | TIP464 | 15.6108 |
| 465 | 20.1983 | TIP465 | 14.034  |
| 466 | 20.3132 | TIP466 | 13.6171 |
| 467 | 20.4541 | TIP467 | 14.1705 |
| 468 | 20.4242 | TIP468 | 14.1908 |
| 469 | 20.6538 | TIP469 | 13.9331 |
| 470 | 20.5812 | TIP470 | 13.7228 |
| 471 | 20.3436 | TIP471 | 13.2145 |
| 472 | 20.2736 | TIP472 | 15.0953 |
| 473 | 20.1055 | TIP473 | 13.9211 |
| 474 | 20.1683 | TIP474 | 11.7874 |
| 475 | 20.4482 | TIP475 | 14.8937 |
| 476 | 20.3241 | TIP476 | 12.586  |
| 477 | 20.4362 | TIP477 | 12.7502 |
| 478 | 20.7958 | TIP478 | 14.1286 |
| 479 | 20.5263 | TIP479 | 14.6863 |
| 480 | 20.2484 | TIP480 | 13.9307 |
| 481 | 20.2523 | TIP481 | 15.8441 |

|     |         |        |         |
|-----|---------|--------|---------|
| 482 | 20.1921 | TIP482 | 15.2043 |
| 483 | 20.2481 | TIP483 | 13.0856 |
| 484 | 20.2223 | TIP484 | 15.9213 |
| 485 | 20.0141 | TIP485 | 15.1035 |
| 486 | 20.2756 | TIP486 | 15.5598 |
| 487 | 20.0064 | TIP487 | 14.7197 |
| 488 | 20.11   | TIP488 | 14.3673 |
| 489 | 20.3453 | TIP489 | 13.9471 |
| 490 | 20.2268 | TIP490 | 16.1677 |
| 491 | 20.2298 | TIP491 | 14.1004 |
| 492 | 20.3857 | TIP492 | 14.6479 |
| 493 | 20.6551 | TIP493 | 15.1899 |
| 494 | 20.5547 | TIP494 | 13.7625 |
| 495 | 20.44   | TIP495 | 14.826  |
| 496 | 20.5294 | TIP496 | 14.2587 |
| 497 | 20.5538 | TIP497 | 15.777  |
| 498 | 20.56   | TIP498 | 14.4569 |
| 499 | 20.0702 | TIP499 | 13.8642 |
| 500 | 20.2206 | TIP500 | 15.9661 |
| 501 | 20.1434 | TIP501 | 14.2231 |
| 502 | 20.3643 | TIP502 | 14.4821 |
| 503 | 20.3831 | TIP503 | 15.7386 |
| 504 | 20.3231 | TIP504 | 13.9269 |
| 505 | 20.2024 | TIP505 | 14.1186 |
| 506 | 20.2115 | TIP506 | 14.7435 |
| 507 | 20.3757 | TIP507 | 15.093  |
| 508 | 20.551  | TIP508 | 15.9194 |
| 509 | 20.5459 | TIP509 | 13.1139 |
| 510 | 20.4126 | TIP510 | 13.3473 |
| 511 | 20.3375 | TIP511 | 14.3859 |
| 512 | 20.3892 | TIP512 | 14.6395 |
| 513 | 20.3517 | TIP513 | 13.4747 |
| 514 | 20.2205 | TIP514 | 12.8198 |
| 515 | 19.9546 | TIP515 | 15.4038 |
| 516 | 20.1386 | TIP516 | 13.982  |
| 517 | 20.4358 | TIP517 | 13.6851 |
| 518 | 20.4702 | TIP518 | 14.4708 |
| 519 | 20.0932 | TIP519 | 14.8296 |
| 520 | 20.3688 | TIP520 | 15.8982 |
| 521 | 20.3443 | TIP521 | 14.5314 |
| 522 | 20.2692 | TIP522 | 12.9246 |
| 523 | 20.4447 | TIP523 | 15.503  |
| 524 | 20.5717 | TIP524 | 14.7814 |
| 525 | 20.4275 | TIP525 | 14.4947 |
| 526 | 20.1272 | TIP526 | 15.0698 |

|     |         |        |         |
|-----|---------|--------|---------|
| 527 | 20.2015 | TIP527 | 15.003  |
| 528 | 20.2417 | TIP528 | 15.9955 |
| 529 | 20.4299 | TIP529 | 16.1696 |
| 530 | 20.4806 | TIP530 | 13.9789 |
| 531 | 20.6569 | TIP531 | 14.6483 |
| 532 | 20.668  | TIP532 | 15.2419 |
| 533 | 20.4869 | TIP533 | 14.591  |
| 534 | 20.4871 | TIP534 | 15.7557 |
| 535 | 20.7055 | TIP535 | 13.7416 |
| 536 | 20.6842 | TIP536 | 13.2359 |
| 537 | 20.2712 | TIP537 | 12.6835 |
| 538 | 20.6129 | TIP538 | 15.3479 |
| 539 | 20.7645 | TIP539 | 14.8088 |
| 540 | 20.5751 | TIP540 | 12.8996 |
| 541 | 20.7987 | TIP541 | 12.266  |
| 542 | 20.404  | TIP542 | 13.4092 |
| 543 | 20.5928 | TIP543 | 14.1026 |
| 544 | 20.5785 | TIP544 | 16.1989 |
| 545 | 20.6734 | TIP545 | 14.7313 |
| 546 | 20.327  | TIP546 | 14.4096 |
| 547 | 20.3234 | TIP547 | 16.1326 |
| 548 | 20.5257 | TIP548 | 14.7015 |
| 549 | 20.327  | TIP549 | 14.6487 |
| 550 | 20.2501 | TIP550 | 13.7756 |
| 551 | 20.3707 | TIP551 | 13.7617 |
| 552 | 20.2372 | TIP552 | 15.7066 |
| 553 | 20.3519 | TIP553 | 13.732  |
| 554 | 20.3416 | TIP554 | 12.2045 |
| 555 | 20.3217 | TIP555 | 15.6337 |
| 556 | 20.4617 | TIP556 | 13.4858 |
| 557 | 20.4177 | TIP557 | 14.7724 |
| 558 | 20.0831 | TIP558 | 17.2732 |
| 559 | 20.3833 | TIP559 | 14.3314 |
| 560 | 20.5731 | TIP560 | 15.3784 |
| 561 | 20.2212 | TIP561 | 14.1949 |
| 562 | 20.4705 | TIP562 | 14.8508 |
| 563 | 20.5224 | TIP563 | 14.0488 |
| 564 | 20.4293 | TIP564 | 14.7001 |
| 565 | 20.443  | TIP565 | 14.5181 |
| 566 | 20.5122 | TIP566 | 12.0541 |
| 567 | 20.5309 | TIP567 | 12.4084 |
| 568 | 20.6013 | TIP568 | 14.8307 |
| 569 | 20.4928 | TIP569 | 14.8219 |
| 570 | 20.4196 | TIP570 | 15.5369 |
| 571 | 20.3704 | TIP571 | 12.6827 |

|     |         |        |         |
|-----|---------|--------|---------|
| 572 | 20.1655 | TIP572 | 16.4234 |
| 573 | 20.5068 | TIP573 | 15.3249 |
| 574 | 20.3388 | TIP574 | 14.4695 |
| 575 | 20.3775 | TIP575 | 15.9847 |
| 576 | 20.351  | TIP576 | 14.668  |
| 577 | 20.4604 | SOD577 | 13.5037 |
| 578 | 20.2694 | SOD578 | 13.4924 |
| 579 | 20.2263 | CLA579 | 13.9555 |
| 580 | 20.3475 | CLA580 | 14.012  |
| 581 | 20.3062 |        |         |
| 582 | 20.4071 |        |         |
| 583 | 20.4372 |        |         |
| 584 | 20.5915 |        |         |
| 585 | 20.8393 |        |         |
| 586 | 20.5757 |        |         |
| 587 | 20.8749 |        |         |
| 588 | 20.8416 |        |         |
| 589 | 21.0831 |        |         |
| 590 | 21.0388 |        |         |
| 591 | 21.0613 |        |         |
| 592 | 20.9552 |        |         |
| 593 | 21.1353 |        |         |
| 594 | 20.8347 |        |         |
| 595 | 20.923  |        |         |
| 596 | 20.8714 |        |         |
| 597 | 21.2573 |        |         |
| 598 | 20.8754 |        |         |
| 599 | 21.0258 |        |         |
| 600 | 21.1862 |        |         |
| 601 | 20.4888 |        |         |
| 602 | 20.323  |        |         |
| 603 | 20.4362 |        |         |
| 604 | 20.1174 |        |         |
| 605 | 20.3723 |        |         |
| 606 | 20.3773 |        |         |
| 607 | 20.6064 |        |         |
| 608 | 20.5157 |        |         |
| 609 | 20.5777 |        |         |
| 610 | 20.4704 |        |         |
| 611 | 20.4236 |        |         |
| 612 | 20.1745 |        |         |
| 613 | 20.4403 |        |         |
| 614 | 20.2676 |        |         |
| 615 | 20.2027 |        |         |
| 616 | 20.5158 |        |         |

|     |         |
|-----|---------|
| 617 | 20.3903 |
| 618 | 20.462  |
| 619 | 20.4721 |
| 620 | 20.4677 |
| 621 | 20.5261 |
| 622 | 20.5618 |
| 623 | 20.3724 |
| 624 | 20.142  |
| 625 | 20.3488 |
| 626 | 20.2152 |
| 627 | 20.3012 |
| 628 | 20.3346 |
| 629 | 20.5872 |
| 630 | 20.4915 |
| 631 | 20.622  |
| 632 | 20.5623 |
| 633 | 20.5855 |
| 634 | 20.3171 |
| 635 | 20.2007 |
| 636 | 20.4727 |
| 637 | 20.3039 |
| 638 | 20.1822 |
| 639 | 20.4264 |
| 640 | 20.1988 |
| 641 | 20.1449 |
| 642 | 20.0947 |
| 643 | 20.4772 |
| 644 | 20.2323 |
| 645 | 20.2511 |
| 646 | 20.1893 |
| 647 | 20.2517 |
| 648 | 20.2561 |
| 649 | 20.3974 |
| 650 | 20.271  |
| 651 | 20.2468 |
| 652 | 20.3574 |
| 653 | 20.0877 |
| 654 | 20.1629 |
| 655 | 20.3101 |
| 656 | 20.193  |
| 657 | 20.0683 |
| 658 | 19.921  |
| 659 | 20.1768 |
| 660 | 20.0817 |
| 661 | 20.3149 |

|     |         |
|-----|---------|
| 662 | 20.265  |
| 663 | 20.1893 |
| 664 | 20.2625 |
| 665 | 20.3451 |
| 666 | 20.202  |
| 667 | 20.0915 |
| 668 | 20.3223 |
| 669 | 20.2381 |
| 670 | 20.2708 |
| 671 | 19.8668 |
| 672 | 19.9664 |
| 673 | 19.8467 |
| 674 | 19.7815 |
| 675 | 19.9339 |
| 676 | 20.0865 |
| 677 | 19.9945 |
| 678 | 20.0511 |
| 679 | 19.9462 |
| 680 | 19.8276 |
| 681 | 20.1635 |
| 682 | 20.0855 |
| 683 | 19.9095 |
| 684 | 19.7078 |
| 685 | 19.8826 |
| 686 | 19.9688 |
| 687 | 20.0763 |
| 688 | 20.2158 |
| 689 | 20.4494 |
| 690 | 19.9601 |
| 691 | 20.0484 |
| 692 | 19.7989 |
| 693 | 20.2372 |
| 694 | 19.9738 |
| 695 | 19.8725 |
| 696 | 19.9411 |
| 697 | 20.0826 |
| 698 | 20.2752 |
| 699 | 20.3997 |
| 700 | 20.2598 |
| 701 | 20.2114 |
| 702 | 20.175  |
| 703 | 20.4654 |
| 704 | 20.2424 |
| 705 | 20.4944 |
| 706 | 20.1545 |



|     |         |
|-----|---------|
| 707 | 19.9696 |
| 708 | 20.161  |
| 709 | 20.3177 |
| 710 | 20.0516 |
| 711 | 20.4046 |
| 712 | 20.5102 |
| 713 | 20.3253 |
| 714 | 20.4594 |
| 715 | 20.1603 |
| 716 | 20.3857 |
| 717 | 20.0591 |
| 718 | 20.1476 |
| 719 | 20.2432 |
| 720 | 20.3959 |
| 721 | 20.1581 |
| 722 | 20.3109 |
| 723 | 20.211  |
| 724 | 20.4814 |
| 725 | 20.5776 |
| 726 | 20.5187 |
| 727 | 20.4284 |
| 728 | 20.5159 |
| 729 | 20.2694 |
| 730 | 20.4755 |
| 731 | 20.2259 |
| 732 | 20.3328 |
| 733 | 20.0996 |
| 734 | 20.055  |
| 735 | 20.2531 |
| 736 | 20.2401 |
| 737 | 20.1886 |
| 738 | 20.1488 |
| 739 | 20.1095 |
| 740 | 20.3765 |
| 741 | 20.2668 |
| 742 | 20.0082 |
| 743 | 19.832  |
| 744 | 19.9126 |
| 745 | 20.1834 |
| 746 | 19.9081 |
| 747 | 19.7091 |
| 748 | 19.9015 |
| 749 | 20.0079 |
| 750 | 19.9599 |
| 751 | 19.7235 |

|     |         |
|-----|---------|
| 752 | 19.8375 |
| 753 | 19.6957 |
| 754 | 19.8207 |
| 755 | 19.6289 |
| 756 | 19.8108 |
| 757 | 19.8382 |
| 758 | 19.7888 |
| 759 | 19.7087 |
| 760 | 19.8746 |
| 761 | 19.9073 |
| 762 | 20.1497 |
| 763 | 19.8788 |
| 764 | 19.884  |
| 765 | 19.7797 |
| 766 | 20.0835 |
| 767 | 19.8956 |
| 768 | 19.9091 |
| 769 | 20.0958 |
| 770 | 19.9816 |
| 771 | 19.8186 |
| 772 | 19.8843 |
| 773 | 19.8814 |
| 774 | 20.0542 |
| 775 | 19.9963 |
| 776 | 20.0687 |
| 777 | 19.6834 |
| 778 | 19.7506 |
| 779 | 19.7725 |
| 780 | 19.7985 |
| 781 | 19.6565 |
| 782 | 20.0202 |
| 783 | 20.1612 |
| 784 | 20.1712 |
| 785 | 20.3098 |
| 786 | 20.1441 |
| 787 | 20.0069 |
| 788 | 19.9913 |
| 789 | 19.5613 |
| 790 | 19.646  |
| 791 | 19.8826 |
| 792 | 19.7668 |
| 793 | 20.1643 |
| 794 | 19.955  |
| 795 | 20.0165 |
| 796 | 20.0278 |

|     |         |
|-----|---------|
| 797 | 20.0501 |
| 798 | 20.038  |
| 799 | 19.8163 |
| 800 | 19.9768 |
| 801 | 20.05   |
| 802 | 19.8444 |
| 803 | 20.0172 |
| 804 | 19.9298 |
| 805 | 20.2875 |
| 806 | 20.1271 |
| 807 | 19.9057 |
| 808 | 19.9081 |
| 809 | 19.9289 |
| 810 | 19.8494 |
| 811 | 19.8284 |
| 812 | 19.807  |
| 813 | 20.0085 |
| 814 | 20.1856 |
| 815 | 20.2265 |
| 816 | 20.2489 |
| 817 | 20.1704 |
| 818 | 20.257  |
| 819 | 20.1606 |
| 820 | 20.0225 |
| 821 | 20.1134 |
| 822 | 20.2807 |
| 823 | 20.1956 |
| 824 | 20.1638 |
| 825 | 20.2101 |
| 826 | 20.315  |
| 827 | 20.3426 |
| 828 | 20.333  |
| 829 | 20.3257 |
| 830 | 19.9582 |
| 831 | 20.3104 |
| 832 | 20.2253 |
| 833 | 20.1258 |
| 834 | 20.0707 |
| 835 | 20.0439 |
| 836 | 20.2386 |
| 837 | 20.1013 |
| 838 | 20.3715 |
| 839 | 20.2581 |
| 840 | 20.2215 |
| 841 | 20.3083 |

|     |         |
|-----|---------|
| 842 | 20.2245 |
| 843 | 19.9299 |
| 844 | 19.748  |
| 845 | 20.0402 |
| 846 | 20.1211 |
| 847 | 20.0162 |
| 848 | 20.1243 |
| 849 | 20.1484 |
| 850 | 20.1474 |
| 851 | 20.2023 |
| 852 | 20.0801 |
| 853 | 19.984  |
| 854 | 20.2242 |
| 855 | 20.1436 |
| 856 | 20.2146 |
| 857 | 20.0999 |
| 858 | 20.121  |
| 859 | 20.1207 |
| 860 | 20.2914 |
| 861 | 20.2606 |
| 862 | 20.2834 |
| 863 | 20.3185 |
| 864 | 20.0973 |
| 865 | 20.1385 |
| 866 | 19.7186 |
| 867 | 19.6929 |
| 868 | 19.834  |
| 869 | 19.8233 |
| 870 | 19.8459 |
| 871 | 19.7824 |
| 872 | 19.9544 |
| 873 | 19.8329 |
| 874 | 19.974  |
| 875 | 20.1385 |
| 876 | 20.1227 |
| 877 | 20.0517 |
| 878 | 19.9363 |
| 879 | 20.06   |
| 880 | 19.8141 |
| 881 | 19.9367 |
| 882 | 20.0208 |
| 883 | 20.0679 |
| 884 | 19.9887 |
| 885 | 19.956  |
| 886 | 19.8048 |

|     |         |
|-----|---------|
| 887 | 19.7368 |
| 888 | 19.8697 |
| 889 | 19.7699 |
| 890 | 20.0455 |
| 891 | 19.9808 |
| 892 | 19.6854 |
| 893 | 19.9992 |
| 894 | 19.8636 |
| 895 | 19.8653 |
| 896 | 20.0171 |
| 897 | 19.8165 |
| 898 | 20.2259 |
| 899 | 20.2582 |
| 900 | 20.19   |
| 901 | 19.9119 |
| 902 | 20.1536 |
| 903 | 19.9415 |
| 904 | 20.0505 |
| 905 | 19.9342 |
| 906 | 20.2354 |
| 907 | 20.1533 |
| 908 | 20.1663 |
| 909 | 20.1392 |
| 910 | 20.2297 |
| 911 | 20.1326 |
| 912 | 20.2388 |
| 913 | 20.2503 |
| 914 | 20.405  |
| 915 | 20.5249 |
| 916 | 20.4861 |
| 917 | 20.5315 |
| 918 | 20.5079 |
| 919 | 20.4449 |
| 920 | 20.156  |
| 921 | 20.2966 |
| 922 | 20.1179 |
| 923 | 20.1742 |
| 924 | 20.2791 |
| 925 | 20.3056 |
| 926 | 20.0119 |
| 927 | 20.1145 |
| 928 | 20.2601 |
| 929 | 20.6171 |
| 930 | 20.5025 |
| 931 | 20.5297 |

|     |         |
|-----|---------|
| 932 | 20.2676 |
| 933 | 20.39   |
| 934 | 20.306  |
| 935 | 20.255  |
| 936 | 20.1485 |
| 937 | 19.9944 |
| 938 | 20.0234 |
| 939 | 20.0433 |
| 940 | 19.855  |
| 941 | 20.0669 |
| 942 | 20.1315 |
| 943 | 20.1583 |
| 944 | 20.2014 |
| 945 | 20.1349 |
| 946 | 20.3001 |
| 947 | 20.2961 |
| 948 | 20.4614 |
| 949 | 20.0943 |
| 950 | 20.2059 |
| 951 | 19.9434 |
| 952 | 20.2563 |
| 953 | 20.1266 |
| 954 | 20.2389 |
| 955 | 20.4147 |
| 956 | 20.4115 |
| 957 | 20.389  |
| 958 | 20.4251 |
| 959 | 20.2641 |
| 960 | 20.5937 |
| 961 | 20.4263 |
| 962 | 20.3966 |
| 963 | 20.3034 |
| 964 | 20.1222 |
| 965 | 19.8259 |
| 966 | 20.0589 |
| 967 | 20.0831 |
| 968 | 20.1375 |
| 969 | 19.8974 |
| 970 | 19.9442 |
| 971 | 19.9952 |
| 972 | 20.1198 |
| 973 | 20.259  |
| 974 | 20.352  |
| 975 | 20.339  |
| 976 | 20.3047 |

|       |         |
|-------|---------|
| 977   | 20.2545 |
| 978   | 20.2005 |
| 979   | 20.0131 |
| 980   | 20.0983 |
| 981   | 20.1002 |
| 982   | 20.1171 |
| 983   | 20.0644 |
| 984   | 20.2232 |
| 985   | 19.9284 |
| 986   | 20.043  |
| 987   | 19.8631 |
| 988   | 20.1055 |
| 989   | 20.0772 |
| 990   | 19.7489 |
| 991   | 19.7285 |
| 992   | 20.1818 |
| 993   | 20.2986 |
| 994   | 20.073  |
| 995   | 20.0608 |
| 996   | 19.9913 |
| 997   | 19.9283 |
| 998   | 19.8449 |
| 999   | 19.8885 |
| 1,000 | 20.1166 |
| 1,001 | 20.2462 |
| 1,002 | 20.1848 |
| 1,003 | 20.2911 |
| 1,004 | 20.4508 |
| 1,005 | 20.2347 |
| 1,006 | 20.4564 |
| 1,007 | 20.6096 |
| 1,008 | 20.6274 |
| 1,009 | 20.5502 |
| 1,010 | 20.5897 |
| 1,011 | 20.4178 |
| 1,012 | 20.537  |
| 1,013 | 20.381  |
| 1,014 | 20.2315 |
| 1,015 | 20.4152 |
| 1,016 | 20.6626 |
| 1,017 | 20.2267 |
| 1,018 | 20.2711 |
| 1,019 | 20.2549 |
| 1,020 | 20.1444 |
| 1,021 | 20.1386 |

|       |         |
|-------|---------|
| 1,022 | 20.063  |
| 1,023 | 20.2064 |
| 1,024 | 20.1182 |
| 1,025 | 20.0949 |
| 1,026 | 20.1786 |
| 1,027 | 20.1226 |
| 1,028 | 20.4795 |
| 1,029 | 20.1396 |
| 1,030 | 20.3626 |
| 1,031 | 20.374  |
| 1,032 | 20.2755 |
| 1,033 | 20.1298 |
| 1,034 | 20.2782 |
| 1,035 | 20.2821 |
| 1,036 | 20.0204 |
| 1,037 | 20.1885 |
| 1,038 | 19.9574 |
| 1,039 | 19.9434 |
| 1,040 | 19.9091 |
| 1,041 | 19.9953 |
| 1,042 | 19.9547 |
| 1,043 | 19.9222 |
| 1,044 | 19.9336 |
| 1,045 | 20.0394 |
| 1,046 | 20.0362 |
| 1,047 | 19.9389 |
| 1,048 | 20.0498 |
| 1,049 | 20.1668 |
| 1,050 | 19.6879 |
| 1,051 | 19.8204 |
| 1,052 | 20.0678 |
| 1,053 | 19.8722 |
| 1,054 | 19.9031 |
| 1,055 | 19.9237 |
| 1,056 | 20.0891 |
| 1,057 | 20.3432 |
| 1,058 | 20.1317 |
| 1,059 | 19.8985 |
| 1,060 | 19.998  |
| 1,061 | 20.0141 |
| 1,062 | 20.1127 |
| 1,063 | 20.1723 |
| 1,064 | 20.1172 |
| 1,065 | 20.033  |
| 1,066 | 19.7876 |



|       |         |
|-------|---------|
| 1,067 | 19.9259 |
| 1,068 | 19.7975 |
| 1,069 | 19.7541 |
| 1,070 | 19.8785 |
| 1,071 | 19.7827 |
| 1,072 | 19.8544 |
| 1,073 | 20.0568 |
| 1,074 | 19.7244 |
| 1,075 | 19.7894 |
| 1,076 | 19.9315 |
| 1,077 | 19.9511 |
| 1,078 | 20.0469 |
| 1,079 | 19.8684 |
| 1,080 | 19.5901 |
| 1,081 | 19.4075 |
| 1,082 | 19.6769 |
| 1,083 | 19.3022 |
| 1,084 | 19.3844 |
| 1,085 | 19.3565 |
| 1,086 | 19.5395 |
| 1,087 | 19.7099 |
| 1,088 | 19.5071 |
| 1,089 | 19.3999 |
| 1,090 | 19.8466 |
| 1,091 | 19.4423 |
| 1,092 | 19.8566 |
| 1,093 | 19.7799 |
| 1,094 | 19.8135 |
| 1,095 | 19.6477 |
| 1,096 | 19.5732 |
| 1,097 | 19.455  |
| 1,098 | 19.5703 |
| 1,099 | 19.8165 |
| 1,100 | 19.7379 |

**Table S5** .RMSD and RMSF values of RMSD-S4- Meldonium.

| Index | RMSD-S4- Meldonium | Residue | RMSF-S4- Meldonium |
|-------|--------------------|---------|--------------------|
| 1     | 0                  | UNK0    | 15.2307            |
| 2     | 9.42766            | TIP2    | 12.6359            |
| 3     | 10.2517            | TIP3    | 13.7865            |
| 4     | 11.2014            | TIP4    | 13.7964            |
| 5     | 12.0707            | TIP5    | 13.7722            |
| 6     | 12.8994            | TIP6    | 12.6162            |
| 7     | 12.9049            | TIP7    | 13.441             |

|    |         |       |         |
|----|---------|-------|---------|
| 8  | 13.6291 | TIP8  | 12.8752 |
| 9  | 13.8751 | TIP9  | 14.2636 |
| 10 | 13.9164 | TIP10 | 13.9611 |
| 11 | 14.3105 | TIP11 | 13.4022 |
| 12 | 14.7649 | TIP12 | 12.7892 |
| 13 | 15.6502 | TIP13 | 14.456  |
| 14 | 16.0277 | TIP14 | 14.5354 |
| 15 | 16.443  | TIP15 | 14.7835 |
| 16 | 16.112  | TIP16 | 14.2721 |
| 17 | 16.4198 | TIP17 | 13.6622 |
| 18 | 16.759  | TIP18 | 14.7021 |
| 19 | 16.5119 | TIP19 | 12.7124 |
| 20 | 16.6924 | TIP20 | 13.4354 |
| 21 | 17.0515 | TIP21 | 11.8025 |
| 22 | 17.0892 | TIP22 | 13.2189 |
| 23 | 17.1122 | TIP23 | 12.107  |
| 24 | 16.9469 | TIP24 | 13.2505 |
| 25 | 16.9613 | TIP25 | 15.2705 |
| 26 | 16.911  | TIP26 | 15.4365 |
| 27 | 17.2384 | TIP27 | 13.7534 |
| 28 | 17.4163 | TIP28 | 14.8394 |
| 29 | 17.4355 | TIP29 | 11.9825 |
| 30 | 17.5836 | TIP30 | 13.6111 |
| 31 | 17.4811 | TIP31 | 12.9648 |
| 32 | 17.6787 | TIP32 | 14.4866 |
| 33 | 17.6462 | TIP33 | 13.5016 |
| 34 | 17.418  | TIP34 | 13.9205 |
| 35 | 17.7913 | TIP35 | 14.4547 |
| 36 | 17.5969 | TIP36 | 13.0077 |
| 37 | 17.6517 | TIP37 | 14.65   |
| 38 | 17.5152 | TIP38 | 13.6986 |
| 39 | 17.8597 | TIP39 | 14.3462 |
| 40 | 17.8498 | TIP40 | 13.7841 |
| 41 | 18.086  | TIP41 | 12.5268 |
| 42 | 18.0493 | TIP42 | 13.0128 |
| 43 | 17.9038 | TIP43 | 14.4779 |
| 44 | 18.0424 | TIP44 | 14.3456 |
| 45 | 17.953  | TIP45 | 12.9915 |
| 46 | 18.0933 | TIP46 | 14.7361 |
| 47 | 17.6852 | TIP47 | 13.3345 |
| 48 | 18.2426 | TIP48 | 14.7578 |
| 49 | 18.1613 | TIP49 | 12.7549 |
| 50 | 18.3263 | TIP50 | 14.9251 |
| 51 | 18.2646 | TIP51 | 13.8845 |
| 52 | 18.2221 | TIP52 | 13.1954 |
| 53 | 18.2293 | TIP53 | 13.9497 |

|    |         |       |         |
|----|---------|-------|---------|
| 54 | 18.1173 | TIP54 | 13.6883 |
| 55 | 18.2215 | TIP55 | 13.838  |
| 56 | 18.0688 | TIP56 | 14.9869 |
| 57 | 18.0251 | TIP57 | 13.2901 |
| 58 | 18.2284 | TIP58 | 13.282  |
| 59 | 18.1967 | TIP59 | 12.6689 |
| 60 | 18.2817 | TIP60 | 15.0768 |
| 61 | 18.3653 | TIP61 | 13.692  |
| 62 | 18.2846 | TIP62 | 12.3693 |
| 63 | 18.4741 | TIP63 | 13.4387 |
| 64 | 18.0741 | TIP64 | 14.8073 |
| 65 | 18.1317 | TIP65 | 13.9458 |
| 66 | 18.1552 | TIP66 | 12.728  |
| 67 | 18.4839 | TIP67 | 13.4675 |
| 68 | 18.8193 | TIP68 | 13.8437 |
| 69 | 18.6633 | TIP69 | 13.4408 |
| 70 | 18.9395 | TIP70 | 14.6796 |
| 71 | 18.6336 | TIP71 | 14.2489 |
| 72 | 18.5    | TIP72 | 12.49   |
| 73 | 18.4783 | TIP73 | 13.928  |
| 74 | 18.4374 | TIP74 | 13.4203 |
| 75 | 18.5127 | TIP75 | 14.3018 |
| 76 | 18.2449 | TIP76 | 12.6298 |
| 77 | 18.34   | TIP77 | 13.5594 |
| 78 | 18.2781 | TIP78 | 13.0511 |
| 79 | 18.5889 | TIP79 | 13.5078 |
| 80 | 18.7303 | TIP80 | 14.7908 |
| 81 | 18.869  | TIP81 | 14.0339 |
| 82 | 19.1785 | TIP82 | 14.5651 |
| 83 | 18.9091 | TIP83 | 13.5958 |
| 84 | 18.7338 | TIP84 | 14.9772 |
| 85 | 19.0661 | TIP85 | 14.778  |
| 86 | 18.6843 | TIP86 | 13.8554 |
| 87 | 18.6355 | TIP87 | 14.0866 |
| 88 | 18.7434 | TIP88 | 14.174  |
| 89 | 18.9495 | TIP89 | 13.7913 |
| 90 | 18.7688 | TIP90 | 12.5371 |
| 91 | 18.6788 | TIP91 | 14.4588 |
| 92 | 18.7984 | TIP92 | 13.9798 |
| 93 | 18.8238 | TIP93 | 13.3766 |
| 94 | 18.901  | TIP94 | 14.6504 |
| 95 | 18.9347 | TIP95 | 14.7384 |
| 96 | 18.9583 | TIP96 | 12.3985 |
| 97 | 19.0776 | TIP97 | 13.6722 |
| 98 | 19.0179 | TIP98 | 13.2845 |
| 99 | 18.9001 | TIP99 | 12.6155 |

|     |         |        |         |
|-----|---------|--------|---------|
| 100 | 19.3095 | TIP100 | 15.1321 |
| 101 | 19.4438 | TIP101 | 14.2367 |
| 102 | 19.6343 | TIP102 | 12.9565 |
| 103 | 19.503  | TIP103 | 11.5877 |
| 104 | 19.537  | TIP104 | 14.4746 |
| 105 | 19.7105 | TIP105 | 12.6311 |
| 106 | 19.6919 | TIP106 | 13.5462 |
| 107 | 19.6787 | TIP107 | 12.7056 |
| 108 | 19.4551 | TIP108 | 13.1982 |
| 109 | 19.2901 | TIP109 | 13.9567 |
| 110 | 19.2588 | TIP110 | 13.2166 |
| 111 | 19.5278 | TIP111 | 13.7674 |
| 112 | 19.5683 | TIP112 | 13.592  |
| 113 | 19.6353 | TIP113 | 12.3621 |
| 114 | 19.558  | TIP114 | 14.7152 |
| 115 | 19.598  | TIP115 | 12.9077 |
| 116 | 19.5404 | TIP116 | 12.5053 |
| 117 | 19.5476 | TIP117 | 13.8256 |
| 118 | 19.4588 | TIP118 | 13.3264 |
| 119 | 19.3458 | TIP119 | 14.1668 |
| 120 | 19.3799 | TIP120 | 13.8851 |
| 121 | 19.5856 | TIP121 | 14.5848 |
| 122 | 19.6573 | TIP122 | 14.2032 |
| 123 | 19.7117 | TIP123 | 15.1288 |
| 124 | 19.7573 | TIP124 | 13.9346 |
| 125 | 19.8524 | TIP125 | 13.298  |
| 126 | 19.8157 | TIP126 | 11.9171 |
| 127 | 19.7011 | TIP127 | 14.4426 |
| 128 | 19.6158 | TIP128 | 13.4613 |
| 129 | 19.4722 | TIP129 | 14.5987 |
| 130 | 19.0931 | TIP130 | 13.6861 |
| 131 | 19.3918 | TIP131 | 12.191  |
| 132 | 19.2392 | TIP132 | 12.9652 |
| 133 | 19.3522 | TIP133 | 12.8056 |
| 134 | 19.3103 | TIP134 | 13.2804 |
| 135 | 19.5805 | TIP135 | 12.3496 |
| 136 | 19.6081 | TIP136 | 14.0165 |
| 137 | 19.7948 | TIP137 | 12.958  |
| 138 | 19.8255 | TIP138 | 12.5565 |
| 139 | 19.7036 | TIP139 | 15.899  |
| 140 | 19.4082 | TIP140 | 13.9424 |
| 141 | 19.5891 | TIP141 | 13.7919 |
| 142 | 19.6726 | TIP142 | 15.3229 |
| 143 | 19.5426 | TIP143 | 13.3227 |
| 144 | 19.5476 | TIP144 | 15.3083 |
| 145 | 19.5162 | TIP145 | 13.6888 |

|     |         |        |         |
|-----|---------|--------|---------|
| 146 | 19.3341 | TIP146 | 15.8376 |
| 147 | 19.4251 | TIP147 | 13.7167 |
| 148 | 19.3762 | TIP148 | 13.9513 |
| 149 | 19.4777 | TIP149 | 13.3603 |
| 150 | 19.4418 | TIP150 | 13.656  |
| 151 | 19.5697 | TIP151 | 14.858  |
| 152 | 19.8061 | TIP152 | 14.2103 |
| 153 | 19.8725 | TIP153 | 12.963  |
| 154 | 19.6085 | TIP154 | 14.1872 |
| 155 | 19.849  | TIP155 | 14.6118 |
| 156 | 19.9745 | TIP156 | 12.4469 |
| 157 | 19.7878 | TIP157 | 12.9056 |
| 158 | 19.9856 | TIP158 | 14.4707 |
| 159 | 19.6782 | TIP159 | 14.0547 |
| 160 | 19.5451 | TIP160 | 12.911  |
| 161 | 19.4886 | TIP161 | 13.8934 |
| 162 | 19.359  | TIP162 | 13.0228 |
| 163 | 19.3852 | TIP163 | 14.221  |
| 164 | 19.5364 | TIP164 | 13.3959 |
| 165 | 19.3067 | TIP165 | 14.4939 |
| 166 | 19.3191 | TIP166 | 14.5312 |
| 167 | 19.5591 | TIP167 | 13.4294 |
| 168 | 19.1946 | TIP168 | 13.7079 |
| 169 | 19.0961 | TIP169 | 14.2993 |
| 170 | 19.1808 | TIP170 | 13.6166 |
| 171 | 19.0902 | TIP171 | 13.0892 |
| 172 | 19.2368 | TIP172 | 13.3491 |
| 173 | 19.3151 | TIP173 | 13.2238 |
| 174 | 19.1919 | TIP174 | 13.8555 |
| 175 | 19.3585 | TIP175 | 13.2027 |
| 176 | 19.3893 | TIP176 | 13.4227 |
| 177 | 19.339  | TIP177 | 12.2995 |
| 178 | 19.3219 | TIP178 | 12.9327 |
| 179 | 19.0194 | TIP179 | 13.7132 |
| 180 | 19.1376 | TIP180 | 12.3746 |
| 181 | 19.0725 | TIP181 | 12.5368 |
| 182 | 19.126  | TIP182 | 13.9191 |
| 183 | 19.1283 | TIP183 | 13.8745 |
| 184 | 19.1256 | TIP184 | 13.3974 |
| 185 | 18.7849 | TIP185 | 14.0667 |
| 186 | 18.7644 | TIP186 | 14.1538 |
| 187 | 18.8121 | TIP187 | 12.9548 |
| 188 | 19.1488 | TIP188 | 15.0562 |
| 189 | 19.0336 | TIP189 | 13.5244 |
| 190 | 19.0847 | TIP190 | 13.3265 |
| 191 | 19.2621 | TIP191 | 14.6267 |

|     |         |        |         |
|-----|---------|--------|---------|
| 192 | 19.435  | TIP192 | 13.0989 |
| 193 | 19.5154 | TIP193 | 14.0156 |
| 194 | 19.3113 | TIP194 | 12.975  |
| 195 | 19.0715 | TIP195 | 15.7566 |
| 196 | 19.0622 | TIP196 | 14.794  |
| 197 | 19.3221 | TIP197 | 13.9326 |
| 198 | 19.1088 | TIP198 | 12.7495 |
| 199 | 19.0277 | TIP199 | 14.1449 |
| 200 | 18.8049 | TIP200 | 13.9876 |
| 201 | 18.8014 | TIP201 | 13.9383 |
| 202 | 19.093  | TIP202 | 12.2418 |
| 203 | 19.0689 | TIP203 | 14.2178 |
| 204 | 19.2323 | TIP204 | 14.2216 |
| 205 | 19.2344 | TIP205 | 13.2031 |
| 206 | 19.0437 | TIP206 | 14.3551 |
| 207 | 18.8513 | TIP207 | 13.3781 |
| 208 | 19.0342 | TIP208 | 14.4652 |
| 209 | 18.5689 | TIP209 | 14.8681 |
| 210 | 18.7952 | TIP210 | 12.7933 |
| 211 | 18.9808 | TIP211 | 14.3358 |
| 212 | 18.7345 | TIP212 | 14.6635 |
| 213 | 19.0247 | TIP213 | 12.6555 |
| 214 | 19.0313 | TIP214 | 12.8243 |
| 215 | 19.0503 | TIP215 | 14.8916 |
| 216 | 19.3344 | TIP216 | 14.2413 |
| 217 | 19.3558 | TIP217 | 12.6592 |
| 218 | 19.0331 | TIP218 | 14.7933 |
| 219 | 19.1328 | TIP219 | 13.8258 |
| 220 | 19.2667 | TIP220 | 13.0634 |
| 221 | 19.1873 | TIP221 | 13.9191 |
| 222 | 19.0203 | TIP222 | 14.3303 |
| 223 | 19.1998 | TIP223 | 13.7795 |
| 224 | 19.1685 | TIP224 | 12.8435 |
| 225 | 19.3938 | TIP225 | 14.1558 |
| 226 | 19.166  | TIP226 | 13.0379 |
| 227 | 19.3407 | TIP227 | 14.8815 |
| 228 | 19.0398 | TIP228 | 14.0631 |
| 229 | 19.2695 | TIP229 | 12.4605 |
| 230 | 19.2159 | TIP230 | 14.4312 |
| 231 | 19.1587 | TIP231 | 15.0224 |
| 232 | 19.0615 | TIP232 | 12.1664 |
| 233 | 19.0636 | TIP233 | 14.4233 |
| 234 | 19.2914 | TIP234 | 14.7343 |
| 235 | 19.2333 | TIP235 | 12.8587 |
| 236 | 18.8603 | TIP236 | 15.2795 |
| 237 | 19.0695 | TIP237 | 13.3036 |

|     |         |        |         |
|-----|---------|--------|---------|
| 238 | 19.0423 | TIP238 | 13.2411 |
| 239 | 19.0453 | TIP239 | 13.5089 |
| 240 | 19.1858 | TIP240 | 13.228  |
| 241 | 19.0181 | TIP241 | 14.6653 |
| 242 | 19.0977 | TIP242 | 13.9148 |
| 243 | 19.2738 | TIP243 | 13.0675 |
| 244 | 19.1482 | TIP244 | 13.028  |
| 245 | 19.4396 | TIP245 | 13.8185 |
| 246 | 19.4595 | TIP246 | 13.7835 |
| 247 | 19.4088 | TIP247 | 12.9441 |
| 248 | 19.5804 | TIP248 | 14.4064 |
| 249 | 19.4536 | TIP249 | 13.5434 |
| 250 | 19.5956 | TIP250 | 13.2546 |
| 251 | 19.5099 | TIP251 | 13.7005 |
| 252 | 19.4198 | TIP252 | 13.4943 |
| 253 | 19.6093 | TIP253 | 13.9678 |
| 254 | 19.3709 | TIP254 | 14.9804 |
| 255 | 19.2981 | TIP255 | 12.4905 |
| 256 | 19.3944 | TIP256 | 14.6428 |
| 257 | 19.6723 | TIP257 | 11.8748 |
| 258 | 19.8054 | TIP258 | 13.8445 |
| 259 | 19.7888 | TIP259 | 14.4858 |
| 260 | 19.5152 | TIP260 | 13.5178 |
| 261 | 19.8513 | TIP261 | 12.7385 |
| 262 | 19.7318 | TIP262 | 12.8965 |
| 263 | 19.9438 | TIP263 | 12.5007 |
| 264 | 19.8124 | TIP264 | 14.0097 |
| 265 | 19.7605 | TIP265 | 14.725  |
| 266 | 19.506  | TIP266 | 13.7711 |
| 267 | 19.5581 | TIP267 | 12.6589 |
| 268 | 19.7879 | TIP268 | 15.7323 |
| 269 | 19.6969 | TIP269 | 14.9802 |
| 270 | 19.9558 | TIP270 | 12.7218 |
| 271 | 19.8182 | TIP271 | 11.7131 |
| 272 | 19.8916 | TIP272 | 13.4066 |
| 273 | 19.6875 | TIP273 | 11.5112 |
| 274 | 19.8116 | TIP274 | 12.4866 |
| 275 | 19.7429 | TIP275 | 13.6712 |
| 276 | 19.6347 | TIP276 | 13.2854 |
| 277 | 19.7213 | TIP277 | 15.9171 |
| 278 | 19.5939 | TIP278 | 12.9784 |
| 279 | 19.4141 | TIP279 | 13.8298 |
| 280 | 19.6048 | TIP280 | 14.0146 |
| 281 | 19.7625 | TIP281 | 14.5302 |
| 282 | 20.0324 | TIP282 | 13.5034 |
| 283 | 19.8815 | TIP283 | 14.6288 |

|     |         |        |         |
|-----|---------|--------|---------|
| 284 | 19.6999 | TIP284 | 12.3605 |
| 285 | 19.6889 | TIP285 | 13.9473 |
| 286 | 19.8941 | TIP286 | 13.7336 |
| 287 | 19.7838 | TIP287 | 12.7229 |
| 288 | 19.6781 | TIP288 | 12.2652 |
| 289 | 19.9472 | TIP289 | 13.4341 |
| 290 | 19.7789 | TIP290 | 13.8968 |
| 291 | 19.7647 | TIP291 | 13.2275 |
| 292 | 19.8225 | TIP292 | 11.9562 |
| 293 | 19.9214 | TIP293 | 13.1551 |
| 294 | 19.9668 | TIP294 | 11.611  |
| 295 | 20.0127 | TIP295 | 14.3358 |
| 296 | 19.8142 | TIP296 | 15.5246 |
| 297 | 19.9424 | TIP297 | 14.8884 |
| 298 | 19.9611 | TIP298 | 11.4943 |
| 299 | 19.9584 | TIP299 | 14.397  |
| 300 | 20.04   | TIP300 | 13.575  |
| 301 | 20.0678 | TIP301 | 15.3632 |
| 302 | 20.1    | TIP302 | 12.5155 |
| 303 | 19.7213 | TIP303 | 12.0747 |
| 304 | 19.9627 | TIP304 | 13.1549 |
| 305 | 19.7306 | TIP305 | 12.5938 |
| 306 | 19.4918 | TIP306 | 14.4777 |
| 307 | 19.3717 | TIP307 | 13.1892 |
| 308 | 19.5311 | TIP308 | 13.9832 |
| 309 | 19.76   | TIP309 | 13.5972 |
| 310 | 19.5546 | TIP310 | 14.5976 |
| 311 | 19.6571 | TIP311 | 14.0961 |
| 312 | 19.5008 | TIP312 | 12.513  |
| 313 | 19.3549 | TIP313 | 12.8966 |
| 314 | 19.4355 | TIP314 | 15.5144 |
| 315 | 19.7572 | TIP315 | 12.6313 |
| 316 | 19.7597 | TIP316 | 11.048  |
| 317 | 19.7775 | TIP317 | 13.8986 |
| 318 | 19.6778 | TIP318 | 14.1389 |
| 319 | 19.6776 | TIP319 | 15.5727 |
| 320 | 19.5783 | TIP320 | 13.8608 |
| 321 | 19.7269 | TIP321 | 12.1959 |
| 322 | 19.5615 | TIP322 | 13.6911 |
| 323 | 19.703  | TIP323 | 13.2421 |
| 324 | 19.6374 | TIP324 | 13.7882 |
| 325 | 19.7099 | TIP325 | 14.4108 |
| 326 | 19.4577 | TIP326 | 14.4112 |
| 327 | 19.4208 | TIP327 | 14.2517 |
| 328 | 19.6302 | TIP328 | 13.5286 |
| 329 | 19.5617 | TIP329 | 13.3346 |



|     |         |        |         |
|-----|---------|--------|---------|
| 330 | 19.561  | TIP330 | 13.754  |
| 331 | 19.4395 | TIP331 | 14.0299 |
| 332 | 19.177  | TIP332 | 13.3924 |
| 333 | 19.4892 | TIP333 | 13.6164 |
| 334 | 19.4326 | TIP334 | 14.47   |
| 335 | 19.4497 | TIP335 | 13.2996 |
| 336 | 19.2787 | TIP336 | 13.4701 |
| 337 | 19.4226 | TIP337 | 12.7868 |
| 338 | 19.3816 | TIP338 | 12.4205 |
| 339 | 19.5247 | TIP339 | 12.2594 |
| 340 | 18.9343 | TIP340 | 14.3832 |
| 341 | 19.0249 | TIP341 | 14.2819 |
| 342 | 19.1256 | TIP342 | 12.9901 |
| 343 | 19.5963 | TIP343 | 14.0135 |
| 344 | 19.5163 | TIP344 | 13.0773 |
| 345 | 19.5033 | TIP345 | 12.9094 |
| 346 | 19.6023 | TIP346 | 12.8034 |
| 347 | 19.6828 | TIP347 | 13.7532 |
| 348 | 19.5175 | TIP348 | 12.7972 |
| 349 | 19.7524 | TIP349 | 13.7753 |
| 350 | 20.0213 | TIP350 | 14.1293 |
| 351 | 19.6022 | TIP351 | 12.5876 |
| 352 | 19.7803 | TIP352 | 14.8082 |
| 353 | 19.841  | TIP353 | 14.0351 |
| 354 | 19.8347 | TIP354 | 11.89   |
| 355 | 19.6573 | TIP355 | 15.2281 |
| 356 | 19.6968 | TIP356 | 12.2716 |
| 357 | 19.8372 | TIP357 | 14.0434 |
| 358 | 19.5758 | TIP358 | 14.5432 |
| 359 | 19.6574 | TIP359 | 13.6965 |
| 360 | 19.7768 | TIP360 | 14.1494 |
| 361 | 19.5207 | TIP361 | 13.7233 |
| 362 | 19.6415 | TIP362 | 13.9251 |
| 363 | 19.63   | TIP363 | 13.8528 |
| 364 | 19.5334 | TIP364 | 14.1459 |
| 365 | 19.4016 | TIP365 | 12.2236 |
| 366 | 19.7587 | TIP366 | 12.6095 |
| 367 | 19.6223 | TIP367 | 14.7515 |
| 368 | 19.6072 | TIP368 | 13.233  |
| 369 | 19.5763 | TIP369 | 13.0134 |
| 370 | 19.4496 | TIP370 | 12.5008 |
| 371 | 19.57   | TIP371 | 13.2871 |
| 372 | 19.5766 | TIP372 | 13.2949 |
| 373 | 19.4794 | TIP373 | 13.4224 |
| 374 | 19.4493 | TIP374 | 12.8837 |
| 375 | 19.4244 | TIP375 | 14.8832 |

|     |         |        |         |
|-----|---------|--------|---------|
| 376 | 19.5695 | TIP376 | 13.3156 |
| 377 | 19.8145 | TIP377 | 14.8771 |
| 378 | 19.8925 | TIP378 | 12.1881 |
| 379 | 20.0397 | TIP379 | 14.8787 |
| 380 | 19.8387 | TIP380 | 14.3348 |
| 381 | 19.8507 | TIP381 | 13.4003 |
| 382 | 19.7321 | TIP382 | 13.3417 |
| 383 | 19.6959 | TIP383 | 14.0293 |
| 384 | 19.6095 | TIP384 | 14.958  |
| 385 | 19.6601 | TIP385 | 12.3437 |
| 386 | 19.8049 | TIP386 | 13.5466 |
| 387 | 19.666  | TIP387 | 13.8471 |
| 388 | 19.6129 | TIP388 | 13.6536 |
| 389 | 19.21   | TIP389 | 13.5451 |
| 390 | 19.3838 | TIP390 | 13.3141 |
| 391 | 19.5656 | TIP391 | 14.3216 |
| 392 | 19.5931 | TIP392 | 13.3969 |
| 393 | 19.6872 | TIP393 | 14.3405 |
| 394 | 19.5589 | TIP394 | 13.5328 |
| 395 | 19.5974 | TIP395 | 13.2194 |
| 396 | 19.2976 | TIP396 | 13.9562 |
| 397 | 19.4913 | TIP397 | 13.8436 |
| 398 | 19.6282 | TIP398 | 13.2864 |
| 399 | 19.546  | TIP399 | 13.5006 |
| 400 | 19.7277 | TIP400 | 12.4035 |
| 401 | 19.7059 | TIP401 | 13.2017 |
| 402 | 19.6248 | TIP402 | 14.5574 |
| 403 | 19.5665 | TIP403 | 13.6055 |
| 404 | 19.5975 | TIP404 | 12.1945 |
| 405 | 19.9351 | TIP405 | 14.6779 |
| 406 | 19.9298 | TIP406 | 13.2812 |
| 407 | 19.5379 | TIP407 | 13.1556 |
| 408 | 19.5803 | TIP408 | 14.267  |
| 409 | 19.6593 | TIP409 | 13.9289 |
| 410 | 19.6045 | TIP410 | 13.5437 |
| 411 | 19.4217 | TIP411 | 14.5597 |
| 412 | 19.3731 | TIP412 | 13.6317 |
| 413 | 19.1605 | TIP413 | 14.347  |
| 414 | 19.1805 | TIP414 | 11.7193 |
| 415 | 19.0804 | TIP415 | 13.4749 |
| 416 | 19.0751 | TIP416 | 13.4948 |
| 417 | 19.3306 | TIP417 | 14.2784 |
| 418 | 19.5294 | TIP418 | 13.0193 |
| 419 | 19.2722 | TIP419 | 14.4656 |
| 420 | 19.4424 | TIP420 | 13.197  |
| 421 | 19.2844 | TIP421 | 14.1778 |

|     |         |        |         |
|-----|---------|--------|---------|
| 422 | 19.2175 | TIP422 | 12.3184 |
| 423 | 19.4899 | TIP423 | 14.2169 |
| 424 | 19.5608 | TIP424 | 13.4824 |
| 425 | 19.6398 | TIP425 | 12.2011 |
| 426 | 19.2955 | TIP426 | 13.7104 |
| 427 | 19.3045 | TIP427 | 13.8399 |
| 428 | 19.5237 | TIP428 | 13.6384 |
| 429 | 19.3129 | TIP429 | 12.8376 |
| 430 | 19.2224 | TIP430 | 13.5559 |
| 431 | 19.435  | TIP431 | 14.2403 |
| 432 | 19.3961 | TIP432 | 14.1808 |
| 433 | 19.6825 | TIP433 | 14.4474 |
| 434 | 19.6723 | TIP434 | 13.4508 |
| 435 | 19.6544 | TIP435 | 15.2567 |
| 436 | 19.4759 | TIP436 | 13.3528 |
| 437 | 19.5457 | TIP437 | 14.663  |
| 438 | 19.2252 | TIP438 | 13.3476 |
| 439 | 19.4799 | TIP439 | 12.0945 |
| 440 | 19.5387 | TIP440 | 14.333  |
| 441 | 19.4225 | TIP441 | 13.0143 |
| 442 | 19.4649 | TIP442 | 14.5687 |
| 443 | 19.7385 | TIP443 | 12.2934 |
| 444 | 19.5011 | TIP444 | 14.7446 |
| 445 | 19.6161 | TIP445 | 13.8129 |
| 446 | 19.5701 | TIP446 | 13.2263 |
| 447 | 19.7529 | TIP447 | 14.622  |
| 448 | 19.5937 | TIP448 | 13.2243 |
| 449 | 19.5249 | TIP449 | 14.3163 |
| 450 | 19.4472 | TIP450 | 14.1933 |
| 451 | 19.4425 | TIP451 | 14.6914 |
| 452 | 19.2372 | TIP452 | 12.9831 |
| 453 | 19.4518 | TIP453 | 13.6878 |
| 454 | 19.5353 | TIP454 | 14.107  |
| 455 | 19.4363 | TIP455 | 13.8845 |
| 456 | 19.8856 | TIP456 | 14.433  |
| 457 | 19.5238 | TIP457 | 13.785  |
| 458 | 19.6555 | TIP458 | 13.2062 |
| 459 | 19.6405 | TIP459 | 12.4226 |
| 460 | 19.6602 | TIP460 | 13.8245 |
| 461 | 19.5047 | TIP461 | 14.172  |
| 462 | 19.4569 | TIP462 | 12.7503 |
| 463 | 19.5601 | TIP463 | 14.6948 |
| 464 | 19.5001 | TIP464 | 12.8502 |
| 465 | 19.3085 | TIP465 | 11.6347 |
| 466 | 19.3375 | TIP466 | 12.5085 |
| 467 | 19.454  | TIP467 | 13.2557 |

|     |         |        |         |
|-----|---------|--------|---------|
| 468 | 19.2611 | TIP468 | 14.8423 |
| 469 | 19.4357 | TIP469 | 13.7576 |
| 470 | 19.3857 | TIP470 | 13.3779 |
| 471 | 19.2546 | TIP471 | 13.6047 |
| 472 | 19.581  | TIP472 | 13.915  |
| 473 | 19.439  | TIP473 | 13.6497 |
| 474 | 19.421  | TIP474 | 11.9296 |
| 475 | 19.4614 | TIP475 | 14.6063 |
| 476 | 19.6167 | TIP476 | 12.5779 |
| 477 | 19.2655 | TIP477 | 14.1966 |
| 478 | 19.5128 | TIP478 | 13.8428 |
| 479 | 19.1169 | TIP479 | 13.9093 |
| 480 | 19.5453 | TIP480 | 14.3572 |
| 481 | 19.3061 | TIP481 | 14.1303 |
| 482 | 19.1268 | TIP482 | 14.9191 |
| 483 | 19.2479 | TIP483 | 13.9984 |
| 484 | 19.5494 | TIP484 | 12.5451 |
| 485 | 19.2859 | TIP485 | 13.5968 |
| 486 | 19.4231 | TIP486 | 13.1628 |
| 487 | 19.5456 | TIP487 | 12.3474 |
| 488 | 19.7239 | TIP488 | 13.3646 |
| 489 | 19.52   | TIP489 | 13.5381 |
| 490 | 19.6553 | TIP490 | 13.5595 |
| 491 | 19.5719 | TIP491 | 12.4444 |
| 492 | 19.6092 | TIP492 | 14.2222 |
| 493 | 19.5277 | TIP493 | 12.9401 |
| 494 | 19.3111 | TIP494 | 14.5417 |
| 495 | 19.404  | TIP495 | 13.1821 |
| 496 | 19.5652 | TIP496 | 13.4327 |
| 497 | 19.5147 | TIP497 | 13.4397 |
| 498 | 19.8878 | TIP498 | 14.5155 |
| 499 | 19.7099 | TIP499 | 12.5993 |
| 500 | 19.8702 | TIP500 | 13.6476 |
| 501 | 19.9638 | TIP501 | 14.0016 |
| 502 | 19.9746 | TIP502 | 12.2903 |
| 503 | 19.8889 | TIP503 | 13.1939 |
| 504 | 19.5982 | TIP504 | 12.1329 |
| 505 | 19.1252 | TIP505 | 13.192  |
| 506 | 19.5376 | TIP506 | 13.8676 |
| 507 | 19.2104 | TIP507 | 14.105  |
| 508 | 19.4525 | TIP508 | 15.0126 |
| 509 | 19.6267 | TIP509 | 12.8368 |
| 510 | 19.4736 | TIP510 | 13.2696 |
| 511 | 19.4249 | TIP511 | 13.066  |
| 512 | 19.4631 | TIP512 | 12.1782 |
| 513 | 19.5461 | TIP513 | 13.8412 |

|     |         |        |         |
|-----|---------|--------|---------|
| 514 | 19.2192 | TIP514 | 12.6384 |
| 515 | 19.3605 | TIP515 | 13.1626 |
| 516 | 19.4546 | TIP516 | 14.0978 |
| 517 | 19.5735 | TIP517 | 15.2204 |
| 518 | 19.4473 | TIP518 | 11.8328 |
| 519 | 19.6429 | TIP519 | 13.1506 |
| 520 | 19.8683 | TIP520 | 11.3886 |
| 521 | 19.6788 | TIP521 | 13.3171 |
| 522 | 19.8952 | TIP522 | 12.6289 |
| 523 | 19.9699 | TIP523 | 13.384  |
| 524 | 19.9163 | TIP524 | 14.4734 |
| 525 | 19.8435 | TIP525 | 13.7879 |
| 526 | 19.961  | TIP526 | 13.9022 |
| 527 | 19.7486 | TIP527 | 13.8434 |
| 528 | 19.5545 | TIP528 | 12.3405 |
| 529 | 19.6707 | TIP529 | 12.9069 |
| 530 | 19.8301 | TIP530 | 13.2576 |
| 531 | 19.8651 | TIP531 | 14.0263 |
| 532 | 19.742  | TIP532 | 13.0667 |
| 533 | 19.7669 | TIP533 | 13.2437 |
| 534 | 19.9385 | TIP534 | 11.7399 |
| 535 | 20.0082 | TIP535 | 14.3669 |
| 536 | 19.5772 | TIP536 | 14.5435 |
| 537 | 19.6616 | TIP537 | 13.8672 |
| 538 | 19.6848 | TIP538 | 13.4014 |
| 539 | 19.887  | TIP539 | 14.1652 |
| 540 | 19.7155 | TIP540 | 12.8207 |
| 541 | 20.0973 | TIP541 | 13.7542 |
| 542 | 19.8457 | TIP542 | 15.3712 |
| 543 | 20.0064 | TIP543 | 13.355  |
| 544 | 20.083  | TIP544 | 13.705  |
| 545 | 20.1911 | TIP545 | 13.1958 |
| 546 | 20.1303 | TIP546 | 13.8227 |
| 547 | 20.2129 | SOD547 | 14.4715 |
| 548 | 20.0015 | CLA548 | 14.9136 |
| 549 | 20.1159 |        |         |
| 550 | 20.2445 |        |         |
| 551 | 19.8868 |        |         |
| 552 | 20.2102 |        |         |
| 553 | 19.9057 |        |         |
| 554 | 20.2678 |        |         |
| 555 | 19.996  |        |         |
| 556 | 20.4561 |        |         |
| 557 | 20.0972 |        |         |
| 558 | 20.2303 |        |         |
| 559 | 20.0301 |        |         |

|     |         |
|-----|---------|
| 560 | 20.2079 |
| 561 | 20.1862 |
| 562 | 20.1499 |
| 563 | 20.1376 |
| 564 | 20.1563 |
| 565 | 19.948  |
| 566 | 20.0518 |
| 567 | 20.2125 |
| 568 | 20.3652 |
| 569 | 20.2341 |
| 570 | 20.1119 |
| 571 | 20.0036 |
| 572 | 20.3678 |
| 573 | 20.3272 |
| 574 | 20.4797 |
| 575 | 20.273  |
| 576 | 20.2    |
| 577 | 20.1813 |
| 578 | 20.0345 |
| 579 | 20.119  |
| 580 | 20.1257 |
| 581 | 20.0428 |
| 582 | 20.0796 |
| 583 | 19.855  |
| 584 | 19.7095 |
| 585 | 19.7065 |
| 586 | 19.4372 |
| 587 | 19.4478 |
| 588 | 19.604  |
| 589 | 19.661  |
| 590 | 19.4837 |
| 591 | 19.5756 |
| 592 | 19.3532 |
| 593 | 19.7555 |
| 594 | 19.8138 |
| 595 | 20.0767 |
| 596 | 20.0464 |
| 597 | 19.7198 |
| 598 | 19.8782 |
| 599 | 19.7853 |
| 600 | 19.7849 |
| 601 | 19.4541 |
| 602 | 19.5065 |
| 603 | 19.4994 |
| 604 | 19.7412 |
| 605 | 19.6235 |

|     |         |
|-----|---------|
| 606 | 19.2889 |
| 607 | 19.0784 |
| 608 | 19.414  |
| 609 | 19.4943 |
| 610 | 19.5261 |
| 611 | 19.5349 |
| 612 | 19.3957 |
| 613 | 19.2411 |
| 614 | 19.3322 |
| 615 | 19.1959 |
| 616 | 19.0974 |
| 617 | 19.0728 |
| 618 | 19.151  |
| 619 | 19.2335 |
| 620 | 19.4854 |
| 621 | 19.5828 |
| 622 | 19.4495 |
| 623 | 19.5709 |
| 624 | 19.6502 |
| 625 | 19.6665 |
| 626 | 19.808  |
| 627 | 19.7529 |
| 628 | 19.5797 |
| 629 | 19.4859 |
| 630 | 19.4767 |
| 631 | 19.3444 |
| 632 | 19.4692 |
| 633 | 19.4139 |
| 634 | 19.4249 |
| 635 | 19.4848 |
| 636 | 19.6343 |
| 637 | 19.6896 |
| 638 | 19.7763 |
| 639 | 19.9426 |
| 640 | 19.8717 |
| 641 | 19.6424 |
| 642 | 19.8376 |
| 643 | 19.6767 |
| 644 | 19.6522 |
| 645 | 19.5856 |
| 646 | 19.5848 |
| 647 | 19.7479 |
| 648 | 19.7187 |
| 649 | 19.6901 |
| 650 | 19.534  |
| 651 | 19.6635 |

|     |         |
|-----|---------|
| 652 | 19.7213 |
| 653 | 19.7176 |
| 654 | 19.681  |
| 655 | 19.3781 |
| 656 | 19.4173 |
| 657 | 19.2994 |
| 658 | 19.2465 |
| 659 | 19.4149 |
| 660 | 19.3299 |
| 661 | 19.6653 |
| 662 | 19.8258 |
| 663 | 19.6591 |
| 664 | 19.3267 |
| 665 | 19.7163 |
| 666 | 19.6607 |
| 667 | 19.6891 |
| 668 | 19.6724 |
| 669 | 19.3395 |
| 670 | 19.6171 |
| 671 | 19.6375 |
| 672 | 19.5713 |
| 673 | 19.7151 |
| 674 | 19.4711 |
| 675 | 19.4494 |
| 676 | 19.2717 |
| 677 | 19.4653 |
| 678 | 19.3226 |
| 679 | 19.4809 |
| 680 | 19.2654 |
| 681 | 19.1992 |
| 682 | 19.7057 |
| 683 | 19.5418 |
| 684 | 19.503  |
| 685 | 19.3206 |
| 686 | 19.322  |
| 687 | 19.1984 |
| 688 | 19.1332 |
| 689 | 19.3604 |
| 690 | 19.3098 |
| 691 | 19.6217 |
| 692 | 19.4809 |
| 693 | 19.4057 |
| 694 | 19.1398 |
| 695 | 19.158  |
| 696 | 19.2317 |
| 697 | 19.3744 |



|     |         |
|-----|---------|
| 698 | 19.5565 |
| 699 | 19.5835 |
| 700 | 19.6262 |
| 701 | 19.6391 |
| 702 | 19.182  |
| 703 | 19.2171 |
| 704 | 19.2482 |
| 705 | 19.4241 |
| 706 | 19.3921 |
| 707 | 19.6058 |
| 708 | 19.4175 |
| 709 | 19.3838 |
| 710 | 19.3609 |
| 711 | 19.338  |
| 712 | 19.2264 |
| 713 | 19.1995 |
| 714 | 19.6255 |
| 715 | 19.6972 |
| 716 | 19.7216 |
| 717 | 19.6905 |
| 718 | 19.8388 |
| 719 | 19.873  |
| 720 | 19.9224 |
| 721 | 19.9153 |
| 722 | 20.0574 |
| 723 | 19.938  |
| 724 | 19.8765 |
| 725 | 19.83   |
| 726 | 19.736  |
| 727 | 19.8942 |
| 728 | 19.9071 |
| 729 | 20.0924 |
| 730 | 20.0125 |
| 731 | 19.785  |
| 732 | 19.8824 |
| 733 | 19.85   |
| 734 | 19.7635 |
| 735 | 19.6811 |
| 736 | 19.6257 |
| 737 | 19.6943 |
| 738 | 19.8356 |
| 739 | 20.0699 |
| 740 | 19.7844 |
| 741 | 19.8044 |
| 742 | 19.7988 |
| 743 | 19.8464 |

|     |         |
|-----|---------|
| 744 | 19.6651 |
| 745 | 19.4508 |
| 746 | 19.5156 |
| 747 | 19.5677 |
| 748 | 19.693  |
| 749 | 19.6074 |
| 750 | 19.4124 |
| 751 | 19.4762 |
| 752 | 19.4624 |
| 753 | 19.1935 |
| 754 | 19.5435 |
| 755 | 19.4614 |
| 756 | 19.379  |
| 757 | 19.4562 |
| 758 | 19.5836 |
| 759 | 19.5785 |
| 760 | 19.5402 |
| 761 | 19.488  |
| 762 | 19.3366 |
| 763 | 19.3864 |
| 764 | 19.4438 |
| 765 | 19.5153 |
| 766 | 19.5785 |
| 767 | 19.4689 |
| 768 | 19.4202 |
| 769 | 19.4803 |
| 770 | 19.3674 |
| 771 | 19.509  |
| 772 | 19.3772 |
| 773 | 19.5513 |
| 774 | 19.2931 |
| 775 | 19.0594 |
| 776 | 19.3696 |
| 777 | 19.0373 |
| 778 | 19.1162 |
| 779 | 19.0787 |
| 780 | 19.1288 |
| 781 | 19.2362 |
| 782 | 19.0497 |
| 783 | 19.3939 |
| 784 | 19.5432 |
| 785 | 19.2228 |
| 786 | 19.4215 |
| 787 | 19.3241 |
| 788 | 19.3009 |
| 789 | 19.4691 |

|     |         |
|-----|---------|
| 790 | 19.4405 |
| 791 | 19.1357 |
| 792 | 19.2061 |
| 793 | 19.1185 |
| 794 | 19.0635 |
| 795 | 19.3514 |
| 796 | 19.4326 |
| 797 | 19.5355 |
| 798 | 19.4545 |
| 799 | 19.3204 |
| 800 | 19.1603 |
| 801 | 19.2796 |
| 802 | 19.4522 |
| 803 | 19.5991 |
| 804 | 19.4935 |
| 805 | 19.6823 |
| 806 | 19.3805 |
| 807 | 19.3988 |
| 808 | 19.2492 |
| 809 | 19.3584 |
| 810 | 18.9809 |
| 811 | 19.1945 |
| 812 | 19.1345 |
| 813 | 19.2745 |
| 814 | 18.9445 |
| 815 | 19.2981 |
| 816 | 19.2196 |
| 817 | 19.3597 |
| 818 | 19.4173 |
| 819 | 19.5109 |
| 820 | 19.5067 |
| 821 | 19.5366 |
| 822 | 19.6652 |
| 823 | 19.4523 |
| 824 | 19.4949 |
| 825 | 19.438  |
| 826 | 19.2135 |
| 827 | 19.3569 |
| 828 | 19.3646 |
| 829 | 19.3558 |
| 830 | 19.4387 |
| 831 | 19.3483 |
| 832 | 19.1497 |
| 833 | 19.2404 |
| 834 | 19.337  |
| 835 | 19.2303 |

|     |         |
|-----|---------|
| 836 | 19.1893 |
| 837 | 19.2632 |
| 838 | 19.1336 |
| 839 | 19.2263 |
| 840 | 19.1448 |
| 841 | 18.9059 |
| 842 | 19.0829 |
| 843 | 19.1942 |
| 844 | 19.2301 |
| 845 | 19.0294 |
| 846 | 19.1549 |
| 847 | 18.9775 |
| 848 | 19.1249 |
| 849 | 19.1749 |
| 850 | 19.2041 |
| 851 | 19.4066 |
| 852 | 19.4907 |
| 853 | 19.5854 |
| 854 | 19.5215 |
| 855 | 19.5183 |
| 856 | 19.1948 |
| 857 | 19.4061 |
| 858 | 19.5789 |
| 859 | 19.2294 |
| 860 | 19.3305 |
| 861 | 19.7674 |
| 862 | 19.3102 |
| 863 | 19.4029 |
| 864 | 19.5648 |
| 865 | 19.3633 |
| 866 | 19.5297 |
| 867 | 19.5986 |
| 868 | 19.322  |
| 869 | 19.3111 |
| 870 | 19.2811 |
| 871 | 19.2451 |
| 872 | 19.0802 |
| 873 | 19.1544 |
| 874 | 19.1815 |
| 875 | 19.1112 |
| 876 | 19.1556 |
| 877 | 19.3334 |
| 878 | 19.341  |
| 879 | 19.3338 |
| 880 | 19.2857 |
| 881 | 19.4361 |

|     |         |
|-----|---------|
| 882 | 19.2126 |
| 883 | 19.2454 |
| 884 | 19.0547 |
| 885 | 19.5211 |
| 886 | 19.4036 |
| 887 | 19.4301 |
| 888 | 19.708  |
| 889 | 19.2929 |
| 890 | 19.243  |
| 891 | 19.0919 |
| 892 | 19.291  |
| 893 | 19.4881 |
| 894 | 19.7847 |
| 895 | 19.4836 |
| 896 | 19.5574 |
| 897 | 19.7336 |
| 898 | 19.5844 |
| 899 | 19.6935 |
| 900 | 19.5167 |
| 901 | 19.1007 |
| 902 | 19.7784 |
| 903 | 19.7762 |
| 904 | 19.6416 |
| 905 | 19.3455 |
| 906 | 19.3874 |
| 907 | 19.4002 |
| 908 | 19.3563 |
| 909 | 19.2591 |
| 910 | 19.4559 |
| 911 | 19.5265 |
| 912 | 19.6421 |
| 913 | 19.4648 |
| 914 | 19.49   |
| 915 | 19.374  |
| 916 | 19.4497 |
| 917 | 19.6538 |
| 918 | 19.5436 |
| 919 | 19.668  |
| 920 | 19.6736 |
| 921 | 19.7223 |
| 922 | 19.6893 |
| 923 | 19.6576 |
| 924 | 19.3637 |
| 925 | 19.614  |
| 926 | 19.8145 |
| 927 | 19.6187 |

|     |         |
|-----|---------|
| 928 | 19.6571 |
| 929 | 19.6161 |
| 930 | 19.6211 |
| 931 | 19.3163 |
| 932 | 19.6023 |
| 933 | 19.5655 |
| 934 | 19.5341 |
| 935 | 19.7359 |
| 936 | 19.7841 |
| 937 | 19.9128 |
| 938 | 19.809  |
| 939 | 19.8233 |
| 940 | 19.7684 |
| 941 | 19.6721 |
| 942 | 19.4524 |
| 943 | 19.6064 |
| 944 | 19.456  |
| 945 | 19.6167 |
| 946 | 19.405  |
| 947 | 19.5015 |
| 948 | 19.4731 |
| 949 | 19.6824 |
| 950 | 19.2437 |
| 951 | 19.2838 |
| 952 | 19.2425 |
| 953 | 19.3833 |
| 954 | 19.435  |
| 955 | 19.1375 |
| 956 | 19.1783 |
| 957 | 19.0655 |
| 958 | 18.7541 |
| 959 | 18.719  |
| 960 | 18.9287 |
| 961 | 19.0924 |
| 962 | 19.2619 |
| 963 | 19.2127 |
| 964 | 19.1053 |
| 965 | 19.3559 |
| 966 | 19.3141 |
| 967 | 19.2921 |
| 968 | 19.2587 |
| 969 | 19.1386 |
| 970 | 19.1795 |
| 971 | 19.0627 |
| 972 | 19.1635 |
| 973 | 19.1264 |

|       |         |
|-------|---------|
| 974   | 19.1767 |
| 975   | 19.1797 |
| 976   | 19.2381 |
| 977   | 19.0573 |
| 978   | 19.0662 |
| 979   | 19.1855 |
| 980   | 19.071  |
| 981   | 19.1679 |
| 982   | 19.2798 |
| 983   | 18.986  |
| 984   | 18.9718 |
| 985   | 18.9246 |
| 986   | 18.9454 |
| 987   | 18.9453 |
| 988   | 19.1983 |
| 989   | 18.795  |
| 990   | 18.8655 |
| 991   | 19.0065 |
| 992   | 18.8635 |
| 993   | 19.0351 |
| 994   | 19.005  |
| 995   | 19.2403 |
| 996   | 19.0772 |
| 997   | 19.0797 |
| 998   | 19.0106 |
| 999   | 18.9256 |
| 1,000 | 18.8039 |
| 1,001 | 18.9522 |
| 1,002 | 18.95   |
| 1,003 | 18.775  |
| 1,004 | 18.8205 |
| 1,005 | 18.9926 |
| 1,006 | 18.7075 |
| 1,007 | 18.7495 |
| 1,008 | 18.7702 |
| 1,009 | 18.9043 |
| 1,010 | 19.0334 |
| 1,011 | 18.9251 |
| 1,012 | 19.0629 |
| 1,013 | 18.8675 |
| 1,014 | 19.04   |
| 1,015 | 18.7914 |
| 1,016 | 18.8877 |
| 1,017 | 18.8046 |
| 1,018 | 18.6731 |
| 1,019 | 18.9048 |

|       |         |
|-------|---------|
| 1,020 | 18.8724 |
| 1,021 | 18.7821 |
| 1,022 | 18.902  |
| 1,023 | 19.2646 |
| 1,024 | 19.013  |
| 1,025 | 18.9311 |
| 1,026 | 19.1089 |
| 1,027 | 18.8407 |
| 1,028 | 18.9767 |
| 1,029 | 18.8326 |
| 1,030 | 19.1478 |
| 1,031 | 18.9587 |
| 1,032 | 18.948  |
| 1,033 | 19.0302 |
| 1,034 | 18.8522 |
| 1,035 | 18.9216 |
| 1,036 | 18.7182 |
| 1,037 | 19.0154 |
| 1,038 | 18.9655 |
| 1,039 | 19.0197 |
| 1,040 | 18.9663 |
| 1,041 | 18.7462 |
| 1,042 | 18.8737 |
| 1,043 | 18.7844 |
| 1,044 | 18.7223 |
| 1,045 | 18.8172 |
| 1,046 | 19.18   |
| 1,047 | 18.8471 |
| 1,048 | 18.9568 |
| 1,049 | 19.0609 |
| 1,050 | 18.9773 |
| 1,051 | 19.3418 |
| 1,052 | 19.2746 |
| 1,053 | 19.2304 |
| 1,054 | 19.3845 |
| 1,055 | 19.0121 |
| 1,056 | 19.0794 |
| 1,057 | 19.3371 |
| 1,058 | 19.2536 |
| 1,059 | 19.3083 |
| 1,060 | 19.2977 |
| 1,061 | 19.3307 |
| 1,062 | 19.3551 |
| 1,063 | 19.3824 |
| 1,064 | 19.3098 |
| 1,065 | 19.3166 |



|       |         |
|-------|---------|
| 1,066 | 19.2502 |
| 1,067 | 18.8724 |
| 1,068 | 19.0493 |
| 1,069 | 19.1016 |
| 1,070 | 19.0868 |
| 1,071 | 19.3202 |
| 1,072 | 19.1833 |
| 1,073 | 19.2553 |
| 1,074 | 19.1216 |
| 1,075 | 19.0884 |
| 1,076 | 19.2117 |
| 1,077 | 19.4392 |
| 1,078 | 19.2566 |
| 1,079 | 19.0431 |
| 1,080 | 19.0731 |
| 1,081 | 18.8894 |
| 1,082 | 19.0535 |
| 1,083 | 19.0276 |
| 1,084 | 19.2983 |
| 1,085 | 19.0544 |
| 1,086 | 19.1979 |
| 1,087 | 19.203  |
| 1,088 | 19.1603 |
| 1,089 | 18.931  |
| 1,090 | 18.8543 |
| 1,091 | 18.9138 |
| 1,092 | 18.8784 |
| 1,093 | 18.9314 |
| 1,094 | 18.8784 |
| 1,095 | 19.2565 |
| 1,096 | 19.2618 |
| 1,097 | 19.1805 |
| 1,098 | 19.1854 |
| 1,099 | 19.2308 |
| 1,100 | 19.1963 |
